# Supplementary material for: Identification of MicroRNAs Involved in Different Layers of rice-Magnaporthe oryzae interaction
Source: Research Square preprint supplement (doi:10.21203/rs.3.rs-7070474/v1), 2025-07-17
Supplement: Supplementary file 1 [file 5b6b660c3433d6cc71129933.xlsx]

## Sheet: Table S1
Table S1: Summary of small RNA-seq profiles
Sample	Reads	miRNA Aligned_reads	Aligned(%)	known_miRNA_categorys
L1	9756944	174401	1.79		LTH_0 hr_repeat1
L1.uniq	1757238	1191	0.07	278
L2	14598327	328635	2.25		LTH_0 hr_repeat2
L2.uniq	3221511	1487	0.05	302
L3	12073368	264036	2.19		LTH_0 hr_repeat3
L3.uniq	2727813	1390	0.05	287
LCK31	9995267	210195	2.1		LTH_CK_3 hr_repeat1
LCK31.uniq	2268091	1323	0.06	279
LCK32	15437394	191337	1.24		LTH_CK_3 hr_repeat2
LCK32.uniq	3242073	1221	0.04	284
LCK33	13418772	243184	1.81		LTH_CK_3 hr_repeat3
LCK33.uniq	3319998	1314	0.04	286
LCK61	14306922	273818	1.91		LTH_CK_6 hr_repeat1
LCK61.uniq	4059996	1372	0.03	300
LCK62	13512611	191201	1.41		LTH_CK_6 hr_repeat2
LCK62.uniq	3536157	1123	0.03	276
LCK63	13339670	275254	2.06		LTH_CK_6 hr_repeat3
LCK63.uniq	3837350	1353	0.04	304
LCH31	13935113	57178	0.41		LTH_chitin_3 hr_repeat1
LCH31.uniq	1454588	819	0.06	253
LCH32	10472311	212477	2.03		LTH_chitin_3 hr_repeat2
LCH32.uniq	2305726	1297	0.06	288
LCH33	13437824	169777	1.26		LTH_chitin_3 hr_repeat3
LCH33.uniq	2871492	1097	0.04	267
LCH61	13628726	162744	1.19		LTH_chitin_6 hr_repeat1
LCH61.uniq	2840956	1082	0.04	273
LCH62	15368653	244003	1.59		LTH_chitin_6 hr_repeat2
LCH62.uniq	4072132	1279	0.03	301
LCH63	13663237	148048	1.08		LTH_chitin_6 hr_repeat3
LCH63.uniq	2684912	1060	0.04	272
L01	10685688	194252	1.82		LTH2_0 hr_repeat1
L01.uniq	1969529	1402	0.07	295
L02	15318244	271369	1.77		LTH2_0 hr_repeat2
L02.uniq	2526524	1508	0.06	307
L03	12053528	260390	2.16		LTH2_0 hr_repeat3
L03.uniq	2258890	1521	0.07	299
LG121	12892361	74013	0.57		LTH2_Guy11_12 hr_repeat1
LG121.uniq	1876782	884	0.05	249
LG122	13545370	56534	0.42		LTH2_Guy11_12 hr_repeat2
LG122.uniq	1964354	916	0.05	260
LG123	5204402	63548	1.22		LTH2_Guy11_12 hr_repeat3
LG123.uniq	1078587	939	0.09	243
LG241	4409304	66058	1.5		LTH2_Guy11_24 hr_repeat1
LG241.uniq	943220	867	0.09	232
LG242	9333792	51878	0.56		LTH2_Guy11_24 hr_repeat2
LG242.uniq	1431134	961	0.07	253
LG243	7177973	47851	0.67		LTH2_Guy11_24 hr_repeat3
LG243.uniq	1208090	938	0.08	238
LM121	9032130	119951	1.33		LTH_melo_12 hr_repeat1
LM121.uniq	1723325	1217	0.07	269
LM122	14577201	200211	1.37		LTH_melo_12 hr_repeat2
LM122.uniq	2471901	1484	0.06	296
LM123	15921023	86867	0.55		LTH_melo_12 hr_repeat3
LM123.uniq	2329435	1011	0.04	265
LM241	12419878	50618	0.41		LTH_melo_24 hr_repeat1
LM241.uniq	1896797	808	0.04	230
LM242	11815342	55509	0.47		LTH_melo_24 hr_repeat2
LM242.uniq	1860396	787	0.04	225
LM243	11706965	60967	0.52		LTH_melo_24 hr_repeat3
LM243.uniq	1911723	812	0.04	230
P01	10933119	129232	1.18		Pizt_0 hr_repeat1
P01.uniq	2392391	1072	0.04	277
P02	15060505	285367	1.89		Pizt_0 hr_repeat2
P02.uniq	3445046	1563	0.05	323
P03	15894875	264907	1.67		Pizt_0 hr_repeat3
P03.uniq	3706416	1515	0.04	311
PR181	15075516	277869	1.84		Pizt_RB22_18 hr_repeat1
PR181.uniq	3956881	1546	0.04	320
PR182	14411632	219389	1.52		Pizt_RB22_18 hr_repeat2
PR182.uniq	3146447	1404	0.04	302
PR183	13739246	209313	1.52		Pizt_RB22_18 hr_repeat3
PR183.uniq	3042538	1359	0.04	294
PR421	13340970	182414	1.37		Pizt_RB22_42 hr_repeat1
PR421.uniq	3081783	1248	0.04	289
PR422	12201229	166449	1.36		Pizt_RB22_42 hr_repeat2
PR422.uniq	2525378	1213	0.05	280
PR423	11407496	153003	1.34		Pizt_RB22_42 hr_repeat3
PR423.uniq	2591082	1211	0.05	285
PA181	13830701	121727	0.88		Pizt_AvrPizt_18 hr_repeat1
PA181.uniq	2652276	1031	0.04	267
PA182	14405834	132004	0.92		Pizt_AvrPizt_18 hr_repeat2
PA182.uniq	2961631	1096	0.04	281
PA183	14220986	152384	1.07		Pizt_AvrPizt_18 hr_repeat3
PA183.uniq	3077537	1108	0.04	282
PA421	10122045	134659	1.33		Pizt_AvrPizt_42 hr_repeat1
PA421.uniq	2056135	1208	0.06	286
PA422	16339014	208248	1.27		Pizt_AvrPizt_42 hr_repeat2
PA422.uniq	2910918	1311	0.05	298
PA423	15396999	197235	1.28		Pizt_AvrPizt_42 hr_repeat3
PA423.uniq	2893160	1318	0.05	309

## Sheet: Table S2
Table S2: miRNA reads with different treatments （TPM）
		PTI															ETS															ETI
		LTH_0 hr			LTH_chitin_3hr			LTH_chitin_6 hr			LTH_CK_3 hr			LTH_CK_6 hr			LTH2_0 hr			LTH_Guy11_12 hr			LTH_Guy11_24 hr			LTH_moelo_12 hr			LTH_melo_24 hr			Pizt_0 hr			Pizt_AvrPzit_18 hr			Pizt_AvrPizt_42 hr			Pizt_RB22_18 hr			Pizt_RB22_42 hr
miRNA_id	Sequence	repeat1	repeat2	repeat3	repeat1	repeat2	repeat3	repeat1	repeat2	repeat3	repeat1	repeat2	repeat3	repeat1	repeat2	repeat3	repeat1	repeat2	repeat3	repeat1	repeat2	repeat3	repeat1	repeat2	repeat3	repeat1	repeat2	repeat3	repeat1	repeat2	repeat3	repeat1	repeat2	repeat3	repeat1	repeat2	repeat3	repeat1	repeat2	repeat3	repeat1	repeat2	repeat3	repeat1	repeat2	repeat3	Length
osa-miR11336-3p	GAATATGGGAAATGCTAGAAAGTCT	0.92242	0.548008	0.662615	0	0.38196	0.520918	0.220123	0.585608	0.146378	0.600284	0.518222	0.29809	0.698962	0.814054	0.749644	0.467916	0.522253	0.829633	0.232696	0.221478	0.576435	1.81435	0.107138	0.27863	0.442863	0.891804	0.31405	0.0805161	0.0846357	0.0854192	0.18293	0.59759	0.18874	0.0723029	0.0694163	0.0703186	0.493971	0.18361	0.0649477	0.132665	0.277554	0.727842	0.374785	0.163918	0.613632	25
osa-miR11336-5p	GACTTTCTAGCGTTGCCCACATTC	0.102491	0.205503	0.248481	0.0717612	0.0954899	0.372084	0.0733744	0.0650675	0.0731891	0.400189	0.259111	0	0.0698962	0.59204	0.0749644	0.467916	0.261127	0.165927	0	0.073826	0	0	0.107138	0.417945	0.221432	0.548802	0.18843	0.161032	0	0.0854192	0.0914652	0.199197	0.251653	0.144606	0.0694163	0	0.0987943	0.122406	0	0.198998	0.346942	0.218353	0.299828	0.081959	0.0876617	24
osa-miR11337-3p	TATCTCGTTAGATTCGTCTCG	0.102491	0.068501	0	0	0.0954899	0.0744168	0	0	0	0	0.194333	0	0.0698962	0.14801	0	0	0	0	0	0.147652	0	0	0	0	0	0	0.06281	0	0	0	0	0	0	0.0723029	0	0	0	0	0.0649477	0	0	0.0727842	0	0	0	21
osa-miR11337-5p	TGCGAGACGAATCTAACGAGG	2.56228	2.19203	2.07067	0.287045	2.8647	1.04184	0.586995	1.43149	0.731891	2.40114	0.712556	1.3414	1.53772	1.62811	2.24893	1.02941	0.979225	1.24445	0.775653	0.664434	1.92145	2.26793	0.857101	0.696575	1.99289	1.92081	0.37686	0.483097	0.677086	1.02503	1.00612	1.19518	0.692047	0.795332	0.485914	0.843823	2.27227	0.795642	0.584529	0.795993	0.971438	0.87341	1.5741	0.901549	0.964278	21
osa-miR11338-3p>osa-miR11341-3p	ATCTCGTTAGATTCGTCTCGCAAA	1.33238	2.46604	15.6543	2.36812	2.00529	4.91151	1.54086	6.83209	0.365945	6.30298	5.247	11.1784	1.95709	4.21828	4.198	5.42782	0.78338	9.20892	6.43792	2.43626	3.07432	9.07173	4.17837	4.45808	3.54291	12.2794	1.63306	2.41548	4.31642	4.61264	2.01223	1.06238	1.19535	0.795332	1.11066	0.632868	1.08674	1.65249	0.519582	1.52565	1.1796	1.60125	1.64906	1.31134	2.36686	24
osa-miR11338-5p	TTTGTGAGACGAATCTAATGATAT	0	0.274004	0	0	0.28647	0.0744168	0	0.325338	0	0.500237	0.0647778	0.223567	0.209689	0.518035	1.0495	0.0935831	0.0652816	0.0829633	0	0.073826	0.192145	0.226793	0.107138	0	0.442863	0.0686003	0	0	0	0	0	0.199197	0.125827	0.289212	0.0694163	0.421912	0.296383	0.0612032	0	0.132665	0.277554	0.218353	0.0749571	0.327836	0.175323	24
osa-miR11339-5p	GCATTGCCCACATTCATATAG	0	0.137002	0.0828269	0	0.38196	0.0744168	0.220123	0.0650675	0.0731891	0.200095	0.194333	0.29809	0	0	0.299857	0	0.195845	0.24889	0	0	0.38429	0	0.214275	0	0	0.0686003	0	0	0	0	0	0.132798	0.18874	0	0.0694163	0	0.0987943	0.0612032	0	0.132665	0.138777	0.363921	0.0749571	0	0.0876617	21
osa-miR11340-3p	AATAGTGTAATCGGATTATAGATC	0.409964	0.342505	0.414135	0.0717612	0.19098	0	0.146749	0.0650675	0.0731891	0.200095	0.194333	0.223567	0.139792	0.222015	0.374822	0.187166	0.130563	0.0829633	0	0	0.38429	0	0.107138	0	0	0.0686003	0	0.0805161	0	0.0854192	0	0.265595	0.125827	0	0	0.0703186	0.197589	0.0612032	0.194843	0.132665	0.0693884	0	0.149914	0.163918	0.0876617	24
osa-miR11340-5p	ATCCGATCTACGATCCGATTACAC	4.20214	3.56205	2.48481	0.215284	2.57823	1.63717	0.440247	2.34243	1.39059	3.8018	1.36033	2.90638	3.6346	0.888059	2.62375	0.748665	0.587535	0.49778	0.387827	0.812086	2.30574	2.49472	1.92848	1.53247	1.99289	1.50921	1.13058	0.40258	0.338543	0.768773	0.640256	1.85917	0.880787	0.795332	1.18008	1.54701	2.07468	2.26452	2.92265	0.663327	1.04083	1.16455	1.87393	2.04897	2.2792	24
osa-miR11341-5p	CCTAGGCTATTTTGCGAGACGAAT	1.02491	2.05503	1.90502	0.717612	1.33686	1.93484	2.71485	4.16432	1.68335	1.60076	1.94333	3.87517	3.98409	3.92226	3.22347	2.99466	2.21958	2.40593	1.55131	0.36913	1.15287	1.58755	0.857101	1.11452	1.77145	1.50921	1.38182	0.161032	1.26954	1.11045	2.3781	2.78875	3.71189	0.939938	1.66599	1.26574	1.97589	1.04045	0.909268	4.0463	2.63676	3.63921	0.974442	1.14743	1.31492	24
osa-miR11342-3p	CTCGTTAGATTCGTCTCGCAAA	7.68683	17.3993	1.15958	0.0717612	8.4986	1.41392	3.00835	5.53074	4.6841	4.50213	2.52633	1.93758	15.6568	7.25248	9.59544	4.67916	6.78929	7.71558	0.387827	1.698	8.45438	4.30907	3.4284	2.22904	14.2823	1.2348	4.83637	1.44929	0.253907	0.427096	0.823187	1.19518	0.125827	1.01224	1.52716	0.843823	1.87709	0.795642	2.33812	0.994991	1.59593	0.87341	1.64906	0.983507	1.05194	22
osa-miR11342-5p	CGAGACGAATCTAACGAGATA	0.102491	0.205503	0.248481	0.0717612	0.28647	0.297667	0.0733744	0.130135	0	0	0	0	0.0698962	0.370025	0.224893	0	0	0	0	0	0	0.226793	0	0.139315	0	0.0686003	0	0	0	0	0	0.0663988	0	0	0	0	0	0	0.0649477	0	0	0.0727842	0	0	0	21
osa-miR11343-3p	TGAATGTGGGCAATGTTAAAA	0	0.068501	0	0	0	0.0744168	0	0.130135	0.0731891	0.200095	0.0647778	0	0.209689	0	0.0749644	0.0935831	0.0652816	0.165927	0	0.073826	0.38429	0	0.107138	0	0.221432	0.0686003	0	0.0805161	0	0	0.274396	0.199197	0.251653	0	0	0	0.197589	0.244813	0.194843	0.198998	0.138777	0.0727842	0	0.081959	0.262985	21
osa-miR11343-5p	CTTTCTAGCGTTGCCCACATT	0	0	0	0	0	0	0.0733744	0.0650675	0	0.100047	0	0.0745225	0.0698962	0.14801	0	0.0935831	0	0.165927	0	0	0	0	0	0	0	0.0686003	0.06281	0	0	0	0	0.0663988	0	0	0	0	0	0	0	0	0	0	0	0	0	21
osa-miR11344-3p	CTGTGAGGTACCGGTACCTAA	0	0.068501	0.0828269	0	0	0	0	0	0	0	0	0	0	0	0	0	0	0	0	0	0	0	0	0	0	0	0	0	0	0	0	0	0	0	0	0	0	0	0	0	0	0	0	0	0	21
osa-miR11344-5p	TATCTCGAGATATCGGTACCTC	0	0	0	0	0	0	0	0	0	0	0	0	0.0698962	0	0.0749644	0	0	0.0829633	0	0	0	0	0	0	0	0	0	0	0	0	0	0	0	0	0.138833	0	0.197589	0	0.0649477	0	0.0693884	0.0727842	0	0	0.0876617	22
osa-miR1319a	AACCGGCATCTGTAATATATTATA	0.717438	0.959014	1.49088	0.0717612	2.38725	0.595334	0.366872	0.910945	0.292756	2.30109	0.259111	2.60829	1.18824	1.92413	0.524751	0.561499	0.261127	0.331853	1.16348	0.590608	0.76858	0.226793	0.42855	0.139315	0.664295	0.960404	0.6281	0.805161	0.846357	0.768773	1.8293	1.19518	0.503307	1.51836	1.18008	1.8986	0.987943	1.65249	1.88348	1.19399	1.45716	1.16455	2.24871	1.63918	1.84089	24
osa-miR1319b	CCTTTAATATATTATAGGTGTCGG	0	0.205503	0	0	0	0	0	0.0650675	0	0	0.0647778	0	0.0698962	0.14801	0.149929	0	0	0	0.0775653	0	0	0.453586	0	0	0	0	0	0	0	0	0	0.0663988	0.0629134	0.144606	0	0.0703186	0.0987943	0	0	0	0.138777	0	0	0.081959	0	24
osa-miR1320-3p	TGTAAAATTCATTCGTTCCAA	0	0	0.331308	0	0.0954899	0	0.0733744	0.0650675	0	0	0	0.0745225	0	0	0	0	0.0652816	0	0	0.073826	0.192145	0	0	0	0	0	0	0	0	0	0.0914652	0.331994	0.125827	0	0	0	0	0	0	0.331664	0.208165	0.145568	0.149914	0.327836	0	21
osa-miR1320-5p	TGGAACGGAGGAATTTTATAG	0.614947	1.43852	1.2424	0.215284	4.20156	1.19067	1.76099	0.650675	2.41524	2.60123	0.712556	0.521657	0.629066	0.222015	0.524751	1.123	1.37091	1.65927	0.387827	1.77182	1.53716	0.226793	0.535688	2.08973	3.43219	3.84162	1.13058	0.40258	0.761721	0.597935	10.5185	15.6037	25.1653	5.35042	7.01105	6.39899	8.19992	9.5477	8.05352	19.8335	9.15927	17.9049	10.9437	16.8016	11.4837	21
osa-miR1423-3p	AGCGCCCAAGCGGTAGTTGTC	0.102491	0.068501	0	0.0717612	0.0954899	0.0744168	0	0	0	0	0	0	0.0698962	0	0	0	0.0652816	0	0.0775653	0.073826	0	0.226793	0	0	0.885727	0.0686003	0	0	0	0	0	0	0	0	0	0.140637	0	0.0612032	0.0649477	0.0663327	0.0693884	0.0727842	0.0749571	0.081959	0.0876617	21
osa-miR1423-5p	AGGCAACTACACGTTGGGCGCTCG	7.27687	13.1522	11.4301	2.65516	13.1776	9.00443	8.36469	8.91425	9.07545	13.6064	7.96767	13.1905	12.5813	7.69651	8.47097	9.26473	8.02964	9.043	2.79235	2.95304	5.38006	4.30907	4.71405	4.04014	6.08937	7.40883	3.39174	2.17393	3.04689	4.0147	5.48791	8.10066	7.73834	2.81981	5.06739	4.00816	4.14936	3.91701	5.26077	10.1489	5.82863	5.60438	6.59622	4.01599	3.15582	24
osa-miR1425-3p	CAGCAAGAACTGGATCTTAAT	14.5537	14.5222	16.8139	3.80334	13.2731	8.11143	9.09843	5.85608	3.95221	14.2067	8.09722	9.31531	12.0222	4.58831	14.1683	13.0081	12.9258	21.9853	2.24939	3.32217	7.87795	4.30907	4.07123	3.62219	8.96798	11.5248	4.96199	1.44929	2.03126	1.53755	8.50626	15.1389	11.7019	1.80757	1.73541	2.53147	3.85298	2.26452	3.11749	8.42426	6.45312	8.00626	2.84837	3.60619	2.89283	21
osa-miR1425-5p	TAGGATTCAATCCTTGCTGCT	54.5253	91.9968	88.6248	21.2413	46.0261	55.9614	51.9491	63.636	31.9104	48.3229	51.2392	55.2211	67.8692	40.1107	89.5075	45.8557	38.5162	64.9602	12.7983	15.5035	25.7474	19.5042	11.7851	14.7674	29.0076	24.9019	10.5521	7.08542	7.44794	9.90863	35.4885	58.8294	55.8042	17.5696	26.9335	16.2436	22.2287	17.7489	18.3802	33.697	28.7268	39.9585	21.8875	18.1949	23.4057	21
osa-miR1426	AGAATCTTGATGATGATTAAA	0	0	0	0	0	0	0	0	0	0	0	0	0	0	0	0	0	0	0	0	0	0	0	0	0	0	0	0	0	0	0	0	0	0	0	0	0	0	0.0649477	0	0	0	0	0	0	21
osa-miR1427	TGCGGAACCGTGCGGTGGCGC	0	0	0	0	0	0	0	0	0	0	0	0	0	0	0	0	0	0	0	0	0	0	0	0	0	0	0	0	0	0	0	0	0.0629134	0	0	0	0	0.244813	0.259791	0	0.138777	0	0.224871	0	0.0876617	21
osa-miR1428a-3p	TAAGATAAAGCCGTGAATTTG	0	0.068501	0	0	0	0.0744168	0	0	0	0	0	0	0	0	0	0	0	0	0	0	0	0	0	0	0	0	0	0	0	0	0	0.199197	0.37748	0	0.0694163	0	0.0987943	0.122406	0	0	0.208165	0	0	0	0	21
osa-miR1428a-5p	CGTTTTGCAAATTCGCAGGCC	0	0	0	0	0	0	0	0	0	0	0	0	0	0	0	0	0	0	0	0	0	0	0	0	0	0	0	0	0	0	0.0914652	0.132798	0	0	0	0	0	0.0612032	0	0	0	0	0	0	0	21
osa-miR1428b>osa-miR1428c>osa-miR1428d	TAAGATAATGCCATGAATTCG	0	0.068501	0	0	0.0954899	0.0744168	0	0	0	0	0	0.0745225	0	0	0	0.187166	0.0652816	0.0829633	0	0	0	0	0	0	0	0	0	0	0	0.0854192	0	0.0663988	0.251653	0.144606	0.0694163	0	0	0	0	0.0663327	0	0	0.0749571	0.081959	0	21
osa-miR1428e-3p	TAAGATAATGCCATGAATTTG	0.409964	1.02752	0.662615	0.143522	0.0954899	0.22325	0.146749	0.325338	0.219567	0.400189	0.259111	0.447135	0.349481	0.222015	1.64922	3.27541	0.587535	0.829633	0	0.221478	0.38429	0.680379	0.107138	0.139315	0.885727	0.137201	0.18843	0	0.0846357	0	2.65249	3.78473	3.90063	0	0.902412	0.351593	0.197589	0.122406	0.324739	1.45932	1.11021	1.67404	0.524699	0.409795	0.438308	21
osa-miR1428e-5p>osa-miR1428f-5p>osa-miR1428g-5p	AATTCACAGGCCCTATCTTGTG	0.614947	1.50702	0.579789	0.0717612	0.28647	0.22325	0.293498	0.585608	0.146378	0.400189	0.259111	0.372612	0.55917	0.14801	0.524751	2.05883	0.456971	0.580743	0.775653	0.516782	1.34502	1.36076	0.535688	0.417945	0.996443	0.686003	0.18843	0.322064	0.338543	0.170838	1.92077	2.12476	2.01323	0	0.416498	0.210956	0.296383	0.367219	0.194843	2.32165	0.902049	0.727842	0.599657	0.327836	0.262985	22
osa-miR1429-3p	GTTGCACGGGTTTGTATGTTG	4.09964	5.61708	4.47265	0.789373	4.20156	2.60459	2.93498	3.38351	2.26886	5.20246	2.915	3.80065	4.47336	2.07214	3.74822	2.05883	1.82789	2.98668	0.930784	1.10739	1.72931	2.26793	1.60706	2.7863	3.32148	3.36141	1.57025	1.44929	0.677086	1.02503	1.09758	1.79277	1.95031	1.15685	1.31891	1.75797	1.87709	1.77489	2.14327	2.58698	2.08165	1.09176	1.42418	1.31134	2.19154	21
osa-miR1429-5p	GTAATATACTAATCCGTGCAT	0.102491	0.068501	0	0.0717612	0	0	0.0733744	0	0	0	0	0.0745225	0	0.0740049	0.149929	0.280749	0.261127	0.0829633	0.155131	0	0	0	0	0	0	0.0686003	0	0	0	0	0	0	0.0629134	0	0	0.210956	0	0	0.0649477	0	0	0	0.149914	0	0	21
osa-miR1430	TGGTGAGCCTTCCTGGCTAAG	0	0	0	0	0	0	0	0	0	0	0	0	0	0	0	0	0	0	0	0	0	0	0	0	0	0	0	0	0.169271	0	1.00612	1.52717	1.19535	2.89212	3.67907	3.16434	2.27227	3.30497	3.31233	3.8473	3.67758	3.34807	3.07324	2.13093	3.85711	21
osa-miR1431	TTTGCGAGTTGGCCCGCTTGC	4.20214	5.75408	4.88679	0.717612	5.15645	3.12551	3.08173	4.48966	1.46378	6.90327	2.59111	4.39683	4.26367	5.55037	3.44836	1.59091	3.00296	4.48002	0.853218	0.885912	1.72931	0.907173	0.857101	1.25384	2.32503	2.19521	1.31901	0.885677	0.846357	0.597935	6.3111	9.42863	8.68204	2.96442	3.95673	4.28944	3.35901	3.48858	3.70202	6.83227	5.13474	5.67717	3.07324	4.5897	3.50647	21
osa-miR1432-3p	CAGGTGTCATCTCCCCTGAAC	0	0.342505	0.165654	0.574089	0.859409	0.446501	0.440247	0.325338	0.585513	0.200095	0.323889	0.59618	0.0698962	0.370025	0.749644	0.748665	0.848661	0.912596	0.387827	0.295304	0.76858	0.226793	0	0	1.43931	0.754603	0.25124	0.241548	0.0846357	0	0.365861	0.531191	1.25827	0.144606	0.485914	0.140637	0.0987943	0.0612032	0.649477	0.198998	0.485719	0.291137	0.224871	0	0	21
osa-miR1432-5p	ATCAGGAGAGATGACACCGAC	28.39	19.3858	20.0441	8.18077	87.8507	39.1432	53.49	13.0135	23.1278	42.8203	31.8059	14.83	16.6353	5.40236	15.2927	28.9172	22.8486	39.6564	7.52384	17.2014	21.136	11.1129	10.7138	17.9716	27.1254	49.941	15.3256	8.53471	9.98702	8.96902	28.5371	41.6321	59.2015	13.376	15.6187	17.7906	32.4045	33.3557	29.2914	48.1576	30.1146	40.7592	33.8806	35.4882	30.1556	21
osa-miR1436	ACATTATGGGACGGAGGGAGT	0.102491	0	0	0.0717612	0	0	0	0.0650675	0	0	0	0	0	0.29602	0	0	0.0652816	0	0	0	0	0	0	0	0	0.343001	0	0	0	0	0.0914652	0	0	0	0	0.0703186	0	0	0	0	0	0	0	0	0	21
osa-miR1437a	TCCGGCGCCGCACTAGGCACTG	0.614947	0.068501	0.248481	0.0717612	0.19098	0.446501	0.293498	0.26027	0.146378	0.600284	0.129556	0.670702	0.349481	0	0.299857	0.280749	0.326408	0.165927	0	0.073826	0.192145	0.680379	0	0	0	0.0686003	0	0	0	0	0.0914652	0	0	0.0723029	0.0694163	0	0	0.122406	0.0649477	0	0.0693884	0	0	0.081959	0	22
osa-miR1437b-3p	GTGCTGGCGAGCTCCGGTGCCGCA	4.40712	3.42505	6.04637	0.789373	6.77978	2.82784	2.27461	2.86297	2.34205	5.5026	3.04456	4.17326	4.26367	2.29415	3.52333	10.5749	6.26704	8.04744	1.62887	1.40269	8.07009	5.21624	1.39279	2.22904	3.10004	5.41942	1.13058	0.885677	1.10026	1.11045	1.55491	2.25756	1.57283	1.15685	1.38833	2.17988	1.28433	1.59128	2.01338	2.12265	1.66532	1.8196	0.824528	1.72114	1.05194	24
osa-miR1437b-5p	GGGAGGAAACAGTGCCTAGTG	3.38221	5.82259	5.71506	1.00466	5.53841	2.53017	1.90774	5.07527	1.82973	6.60313	3.17411	5.73823	6.15087	3.70025	5.69729	9.07756	9.92281	12.1126	1.86157	2.06713	9.41511	6.577	2.78558	3.48288	4.42863	6.72283	3.95703	1.28826	1.10026	1.11045	5.85377	6.77268	6.03968	3.68745	3.67907	4.85198	2.66745	2.44813	3.31233	7.36293	6.66129	4.73097	2.69845	1.8031	2.36686	21
osa-miR1439	TTTTGGAACGGAGTGAGTATT	0	0	0	0	0	0	0	0	0	0	0.0647778	0	0	0	0	0	0	0	0	0	0	0	0	0	0	0	0	0.0805161	0	0	0	0	0	0	0	0.0703186	0	0	0.0649477	0	0	0	0	0	0	21
osa-miR1440a	TGCTCAAATACCACTCTCCT	0	0	0	0	0	0	0	0	0	0	0	0	0	0	0	0	0	0	0	0	0	0	0	0	0	0	0	0	0	0	0	0	0	0	0	0	0	0	0	0.0663327	0	0	0	0	0	20
osa-miR1440b	TTTAGGAGAGTGGTATTTGAG	0	0.068501	0	0.0717612	0	0	0	0	0.0731891	0	0.0647778	0	0	0	0	0	0	0	0	0	0	0	0	0	0	0	0	0	0	0	0	0.0663988	0.18874	0.0723029	0	0	0	0.122406	0	0.132665	0.208165	0	0.149914	0	0.0876617	21
osa-miR1441	ACCGGATGTCGGAAAAGGTTT	0	0	0	0	0.0954899	0	0	0	0	0	0	0	0	0	0	0	0	0.0829633	0	0	0	0	0	0	0	0	0	0	0	0	0	0	0	0	0	0	0	0	0	0	0	0	0	0	0	21
osa-miR1442	ATTCATAGTACTAGATGTGT	0	0.068501	0.248481	0	0	0	0	0	0	0.100047	0	0	0	0.0740049	0	0	0.130563	0	0	0	0.38429	0	0	0	0	0	0	0	0	0	0	0	0.0629134	0	0	0	0.0987943	0.0612032	0	0	0	0	0	0	0	20
osa-miR156a>osa-miR156b-5p>osa-miR156c-5p>osa-miR156d>osa-miR156e>osa-miR156f-5p>osa-miR156g-5p>osa-miR156h-5p>osa-miR156i>osa-miR156j-5p	TGACAGAAGAGAGTGAGCAC	3577.35	4124.65	3975.44	698.308	4048.1	1820.68	1868.63	1553.75	1897.28	4017.5	1903.69	2796.08	2175.87	1094.68	2106.87	678.758	611.819	807.233	152.416	148.538	470.755	514.82	221.989	296.741	523.907	840.491	194.962	134.864	142.78	118.818	924.439	1977.76	1760.63	681.6	785.585	998.313	1279.48	1141.44	1093.01	1940.03	1384.37	1484.65	1067.54	1177.75	1032.92	20
osa-miR156b-3p	GCTCACTCTCTATCTGTCAGC	5.84199	13.2892	9.93923	2.43988	6.68429	2.38134	3.37522	2.92804	3.07394	5.30251	2.915	7.67581	4.89274	2.88619	2.69872	0.187166	0.848661	0.331853	0.310261	0.073826	0.192145	0.680379	0	0	0.332148	0	0.06281	0	0	0.0854192	0.18293	0.863185	0.37748	0.433817	0.416498	1.8986	0.296383	0.612032	0.584529	0.795993	0.555107	0.291137	0.749571	0.81959	0.262985	21
osa-miR156c-3p>osa-miR156g-3p	GCTCACTTCTCTCTCTGTCAGC	79.7381	108.026	83.3239	17.0074	106.758	50.529	51.5822	70.7935	46.9874	98.6467	50.2028	71.9142	86.252	44.921	75.1143	15.1605	17.3649	15.5971	5.89496	4.87251	17.8695	20.6382	6.74967	9.47343	13.7288	15.7781	5.84133	5.23355	6.51695	3.92928	23.9639	42.2961	34.0361	18.0757	20.2696	28.2681	22.9203	22.7676	29.4863	45.2389	37.4697	28.4586	21.8875	24.1779	19.7239	22
osa-miR156f-3p>osa-miR156h-3p>osa-miR156l-3p	GCTCACTTCTCTTTCTGTCAGC	9.32669	8.15162	6.70898	2.29636	8.68958	3.34876	6.0167	5.92114	2.56162	7.50355	5.37656	7.07963	9.64568	3.18221	7.79629	2.33958	1.50148	3.65038	1.16348	0.590608	0.38429	0.453586	0.857101	0.696575	1.66074	1.1662	0.43967	0	0.423179	0.512515	2.01223	5.6439	4.40394	1.59066	1.73541	1.47669	2.46986	1.71369	1.3639	4.44429	1.24899	2.32909	0.899485	0.491754	1.31492	22
osa-miR156j-3p	GCTCGCTCCTCTTTCTGTCAGC	2.76726	3.42505	2.81612	1.72227	5.44292	1.3395	1.76099	1.69176	1.39059	4.00189	1.68422	3.6516	2.16678	1.4801	1.27439	1.59091	2.21958	1.32741	0.698088	1.84565	0.576435	1.36076	0.749963	1.25384	1.77145	2.19521	0.12562	0.644129	0.507814	0.512515	2.28663	4.38232	3.71189	1.08454	1.31891	1.26574	0.889148	1.16286	1.3639	4.84229	2.28982	1.52847	1.49914	1.22938	1.05194	22
osa-miR156k	TGACAGAAGAGAGAGAGCACA	5.32954	2.80854	2.81612	0.143522	2.29176	1.48834	0.953868	0.845878	1.39059	4.10194	1.749	0.968792	1.04844	0.888059	1.57425	0.187166	0.456971	0.24889	0.155131	0	0.192145	0	0	0	0.553579	0.548802	0.06281	0.0805161	0	0	0.18293	0.663988	0.37748	0.144606	0.347082	0.49223	1.08674	0.489626	0.389686	0.464329	0.277554	0.436705	0.524699	0.409795	0.175323	21
osa-miR156l-5p	CGACAGAAGAGAGTGAGCATA	28.2875	18.7008	28.3268	3.94686	19.0025	12.1299	14.7483	12.8183	7.83123	23.5111	6.413	23.251	10.4145	6.29042	14.1683	4.86632	3.13352	4.39705	1.62887	0.885912	3.8429	3.1751	0.964238	3.90082	4.42863	6.44843	1.69587	1.04671	1.43881	1.19587	5.03059	8.03426	7.5496	3.39824	4.72031	6.25836	11.5589	9.36409	7.72878	9.35291	7.07762	6.9145	8.84493	7.21239	3.94477	21
osa-miR159a.1>osa-miR159b	TTTGGATTGAAGGGAGCTCTG	738.448	972.646	1032.77	268.171	874.401	618.032	499.166	516.181	625.694	918.935	528.587	871.093	678.623	544.972	724.831	479.613	368.515	502.508	76.4794	132.222	274.191	165.786	117.744	116.607	255.2	376.341	108.787	82.529	103.425	82.1733	258.115	502.042	476.38	216.981	265.032	318.684	325.033	276.944	281.678	618.221	399.816	398.057	286.561	273.743	273.767	21
osa-miR159a.2	TTGCATGCCCCAGGAGCTGCA	3.89466	4.58957	3.81004	0.430567	3.05568	1.3395	1.90774	2.27736	1.53697	5.5026	2.46156	2.53376	3.21523	1.77612	3.52333	2.62033	2.02373	3.73335	1.00835	1.32887	3.07432	1.36076	0.857101	1.67178	2.32503	3.56721	0.81653	1.20774	0.677086	0.597935	0.457326	0.663988	0.692047	0.578423	0.555331	0.843823	0.395177	1.04045	0.909268	1.65832	0.902049	0.946195	0.749571	1.3933	1.05194	21
osa-miR159c	ATTGGATTGAAGGGAGCTCCA	2.04982	0.274004	1.98785	0.358806	0	0.669751	1.24737	0.325338	1.3174	0	0	0	0.209689	0.29602	0.674679	1.21658	0.326408	3.1526	0.542957	0	1.15287	1.13397	0.321413	0.139315	3.54291	0.686003	0	0.563613	1.01563	0	0.18293	0.995983	0.629134	0.0723029	0.208249	0.0703186	0.987943	0	0.519582	0.265331	0.0693884	0.655058	0.524699	0.245877	0	21
osa-miR159d	ATTGGATTGAAGGGAGCTCCG	0.512456	0.890513	0	0.215284	2.10078	0.148834	0	0.195203	0.0731891	2.60123	1.42511	1.04331	0.0698962	0.666044	0.524751	1.87166	0.718098	0.165927	0	0.073826	0	0.453586	0.214275	0.139315	0.221432	0	1.06777	0.40258	0.253907	1.19587	1.09758	0.199197	0.125827	0.50612	0	0.351593	0.987943	0.18361	0.389686	1.39299	1.45716	0.436705	0.224871	0	0.788955	21
osa-miR159e	ATTGGATTGAAGGGAGCTCCT	0.717438	1.84953	0.745442	0.143522	1.14588	0.893002	0.513621	1.82189	0	0.800379	0.0647778	0.819747	2.72595	0.59204	1.49929	5.14707	2.93767	2.57186	0	0.73826	0.192145	0	0	0.696575	0.664295	4.11602	0.06281	0.322064	0.253907	0.170838	0	0	1.06953	0	0.555331	0.421912	0	0.673235	0.259791	0	0.346942	0.291137	0.0749571	0.81959	0.262985	21
osa-miR159f	CTTGGATTGAAGGGAGCTCTA	16.5011	50.6222	42.4074	14.3522	39.1509	23.1436	18.5637	20.4963	19.2487	20.8098	18.1378	27.7969	15.5869	17.7612	17.1668	21.1498	20.5637	24.3912	1.08591	2.95304	4.99577	4.53586	3.64268	3.48288	10.6287	16.3269	1.63306	3.46219	4.14715	2.30632	11.8905	27.3563	29.1918	5.85654	6.10864	8.93046	10.6698	15.3008	14.2885	38.871	11.6573	14.848	11.2436	11.884	16.0421	21
osa-miR160a-3p>osa-miR160b-3p	GCGTGCAAGGAGCCAAGCATG	0.102491	0.137002	0	0.143522	0.0954899	0.22325	0.146749	0.195203	0.146378	0.100047	0.129556	0.29809	0.349481	0.0740049	0.524751	0.280749	0.587535	0.0829633	0	0	0.576435	0.453586	0	0.139315	0	0.205801	0.12562	0	0	0	0.548791	0.132798	0.314567	0.0723029	0.138833	0.281274	0.0987943	0.244813	0	0.132665	0.138777	0.291137	0	0.163918	0.0876617	21
osa-miR160a-5p>osa-miR160b-5p>osa-miR160c-5p>osa-miR160d-5p	TGCCTGGCTCCCTGTATGCCA	20.0883	14.5907	25.842	4.73624	26.3552	11.3114	13.0606	11.6471	3.65945	12.9061	16.1944	8.12295	17.1945	21.3134	14.2432	9.17115	10.8368	15.3482	2.40452	1.84565	6.14864	9.52531	5.46402	3.34356	5.64651	9.74124	1.13058	1.61032	5.24741	4.18554	2.74396	8.29985	5.41055	0.795332	6.10864	4.85198	5.53248	4.22302	4.54634	14.7259	8.11844	2.18353	6.14648	1.8031	5.52268	21
osa-miR160c-3p	GCGTGCACGGAGCCAAGCATA	0	0	0	0	0	0	0	0.0650675	0	0	0	0	0	0	0	0	0	0	0	0	0	0	0	0	0	0	0	0	0	0	0	0	0	0	0	0	0	0	0	0	0	0	0	0	0	21
osa-miR160d-3p	GCGTGCGAGGAGCCAAGCATG	0	0	0	0	0	0	0	0	0	0	0	0	0	0	0	0	0	0.0829633	0	0	0	0	0	0	0	0	0	0	0	0	0.18293	0	0	0	0	0	0	0	0	0	0	0	0	0	0	21
osa-miR160e-5p	TGCCTGGCTCCCTGTATGCCG	20.0883	31.031	19.7128	7.10436	25.4003	11.1625	6.82382	38.3248	13.0277	33.6159	9.13367	29.0638	42.7066	19.2413	44.0041	23.8637	15.9287	13.44	8.06679	6.27521	20.5595	11.3397	7.49963	9.1948	20.3717	10.7702	5.0248	6.44129	3.21616	3.67303	5.48791	9.89343	7.92708	3.54284	4.2344	3.30497	5.03851	7.16077	11.1061	5.43928	3.26125	6.18666	3.89777	6.96651	3.94477	21
osa-miR160f-3p	GCATTGAGGGAGTCATGCAGG	0	0	0	0	0	0	0	0.0650675	0	0	0	0	0.0698962	0	0.0749644	0	0.0652816	0	0.0775653	0	0	0	0	0	0.110716	0	0	0	0	0	0.0914652	0.132798	0.0629134	0	0	0	0	0	0	0	0	0	0	0	0	21
osa-miR160f-5p	TGCCTGGCTCCCTGAATGCCA	45.4036	67.7475	62.9485	14.2805	53.0924	28.204	26.1947	45.287	25.6162	54.7259	33.6844	58.4256	49.2768	43.1449	54.4991	34.5322	28.2669	31.3601	9.69566	11.5907	26.9003	33.5654	15.6421	18.3896	32.6612	31.3503	11.9339	10.6281	13.1185	14.1796	10.3356	22.31	16.3575	7.15799	14.2998	14.4153	18.8697	20.8091	23.3162	21.7571	20.0532	11.2816	15.1413	16.4738	21.2141	21
osa-miR162a	TCGATAAACCTCTGCATCCAG	1148.72	1189.31	1392.98	110.082	1610.91	1023.23	1124.17	806.382	952.556	1506.01	842.305	1488.06	990.639	861.788	935.855	842.248	842.198	908.697	344.778	351.042	1040.85	716.666	386.231	404.85	937.542	999.986	426.355	333.981	562.828	470.66	551.81	689.552	584.654	398.606	514.167	511.427	721.198	802.435	741.573	922.157	748.631	604.036	991.682	910.154	814.552	21
osa-miR162b	TCGATAAGCCTCTGCATCCAG	23.4705	28.4964	27.5814	2.15284	22.9176	14.4369	12.6204	20.236	13.2472	27.513	13.992	26.4555	22.7862	17.9832	26.0876	53.1552	56.4033	50.7735	7.98923	16.3894	39.0054	29.0295	18.5348	16.8571	44.6185	52.2734	20.2248	14.976	23.8673	19.6464	58.9951	75.1635	69.2676	29.1381	27.4889	40.9958	56.6091	63.7737	65.4024	81.7882	71.817	59.2463	57.2672	61.1414	61.6261	21
osa-miR164a>osa-miR164b>osa-miR164f	TGGAGAAGCAGGGCACGTGCA	32.5922	53.7733	73.3847	13.6346	48.9863	25.8971	34.1925	48.15	27.3727	31.9151	18.9151	83.018	81.4291	49.7313	70.5415	70.2809	24.807	31.9409	9.30784	23.6243	32.6647	14.288	24.106	20.8973	50.7079	72.1675	19.848	15.7812	9.4792	15.888	28.9945	60.6885	23.9071	19.9556	30.3349	26.7211	14.1276	39.4761	19.0946	83.6456	50.029	29.8415	32.0816	11.5562	15.9544	21
osa-miR164c	TGGAGAAGCAGGGTACGTGCA	0	0.068501	0.0828269	0	0	0.0744168	0.513621	0.0650675	0.0731891	0	0.129556	0	0.279585	0.0740049	0.149929	0	0.0652816	0.0829633	0	0.073826	0.576435	0.226793	0	0.139315	0.110716	0.205801	0	0	0	0	0	0.0663988	0.125827	0	0.0694163	0.140637	0.0987943	0.0612032	0.0649477	0.0663327	0	0.0727842	0.149914	0	0	21
osa-miR164d	TGGAGAAGCAGGGCACGTGCT	3.4847	38.5661	6.04637	0.861134	3.05568	9.07885	2.78823	30.842	13.3936	23.4111	17.1661	4.24778	2.93564	35.5224	7.64637	2.15241	43.4776	45.132	12.0226	2.21478	29.3982	23.3597	2.78558	1.39315	2.32503	6.03682	1.75868	1.20774	9.73311	1.87922	1.00612	3.18714	30.6388	2.02448	1.24949	0.984461	23.513	2.08091	26.9533	5.96994	1.45716	1.01898	2.24871	19.998	27.7011	21
osa-miR164e	TGGAGAAGCAGGGCACGTGAG	4.09964	4.86357	5.88071	1.21994	3.8196	1.41392	3.30185	3.77392	2.85437	7.10336	2.52633	5.44014	5.38201	5.18035	4.49786	4.58557	4.56971	2.82075	1.47374	0.812086	0.576435	3.62869	1.7142	1.25384	7.97154	2.88121	0.81653	0.40258	1.35417	0.512515	3.56714	5.9759	2.13905	0.578423	4.99798	1.54701	2.17347	3.24377	3.83192	8.62325	8.04905	3.85756	1.34923	1.31134	2.9805	21
osa-miR166a-3p>osa-miR166b-3p>osa-miR166c-3p>osa-miR166d-3p>osa-miR166f>osa-miR166j-3p	TCGGACCAGGCTTCATTCCCC	836.942	1279.6	939.175	163.4	998.538	681.509	536.147	855.573	591.148	1190.06	573.478	837.707	1055.99	910.335	1053.92	612.876	594.65	862.154	149.934	137.095	546.845	484.884	224.882	273.058	674.813	813.325	169.273	207.087	233.595	262.066	432.905	674.479	531.618	262.098	381.373	388.651	372.158	386.559	554.004	561.506	470.939	465.091	349.825	427.416	335.569	21
osa-miR166a-5p>osa-miR166e-5p	GGAATGTTGTCTGGTTCAAGG	1.33238	3.97306	3.81004	0.430567	3.15117	0.818585	0.733744	4.68486	0.512324	3.10147	1.166	2.60829	7.75848	2.14614	5.09758	8.42248	5.81007	8.54522	0.232696	0.295304	1.34502	0.907173	0.857101	0.696575	1.32859	1.44061	0.6281	0.483097	0.423179	0.0854192	0.823187	2.19116	0.9437	1.37376	0.347082	1.40637	0.889148	0.428422	1.10411	1.45932	2.22043	2.03796	0.899485	0.81959	0.52597	21
osa-miR166b-5p	GGAATGTTGTCTGGCTCGGGG	3.17722	6.7816	4.88679	2.43988	10.1219	3.72084	3.00835	3.77392	4.6841	7.00331	4.46967	7.52677	7.3391	5.47637	3.44836	11.5107	7.89908	6.5541	0.930784	2.21478	5.57221	2.94831	1.07138	3.06493	4.31792	5.96822	2.13554	1.12723	1.35417	1.87922	3.20128	5.31191	5.1589	1.51836	1.73541	3.86752	1.7783	2.63174	2.8577	5.43928	3.81636	4.65819	2.77341	1.88506	2.45453	21
osa-miR166c-5p	GGAATGTTGTCTGGTCCGAG	0.204982	0.822012	0.496962	0.0717612	0.47745	0.148834	0	0.650675	0.146378	0.500237	0.194333	1.04331	0.629066	0.29602	0.374822	0.655082	0.326408	0.663706	0	0.073826	0.76858	0.680379	0.107138	0.139315	0.885727	0.274401	0	0.161032	0.169271	0	0.18293	0.331994	0.440394	0.144606	0.555331	0.140637	0	0.122406	0.194843	1.32665	0	0.218353	0.149914	0.081959	0.613632	20
osa-miR166d-5p	GGAATGTTGTCTGGCTCGAGG	23.2655	24.1124	21.7007	4.09039	33.2305	13.5439	9.24518	21.212	10.0269	27.2129	11.7248	19.0778	26.1412	22.9415	20.1654	31.4439	22.5222	24.889	3.8007	5.31547	19.2145	18.3702	7.60677	11.1452	16.3859	19.0023	6.59505	5.39458	7.87112	5.12515	27.0737	39.7729	31.8971	17.5696	17.7706	21.3769	16.4986	19.2178	22.407	38.672	30.0452	28.9681	20.5382	21.0635	24.8959	21
osa-miR166e-3p	TCGAACCAGGCTTCATTCCCC	0.717438	1.84953	1.32523	0.215284	0.859409	0.520918	0.0733744	0.910945	0.512324	0.900426	0.323889	1.19236	0.838755	1.18408	1.57425	0.935831	1.50148	0.995559	0.0775653	0.442956	0.960725	0.680379	0.107138	0.139315	0.553579	0.686003	0.18843	0.0805161	0.0846357	0.256258	0	0.531191	0.9437	0.216909	0.347082	0.914142	0.296383	0.918048	0.519582	0.928658	0.485719	0.291137	0.299828	0.573713	0.350647	21
osa-miR166g-3p>osa-miR166h-3p	TCGGACCAGGCTTCATTCCTC	257.15	422.103	401.711	52.7445	307.382	193.186	142.567	393.398	126.251	363.472	231.969	279.161	493.677	281.367	420.55	310.228	282.343	277.844	88.9674	98.41	386.788	189.599	142.707	104.486	303.472	225.009	90.1952	91.5468	110.957	99.9405	137.472	298.596	176.22	127.904	184.578	223.965	161.726	184.895	216.146	313.488	168.544	146.515	177.723	137.363	270.173	21
osa-miR166g-5p	AATGGAGGCTGATCCAAGATC	1.22989	2.94554	1.65654	0.358806	0.859409	0.22325	0.0733744	0.585608	0.219567	1.30062	0.388667	1.93758	2.02699	2.59017	1.19943	0.0935831	0.130563	0.331853	0.232696	0.147652	0.76858	1.13397	1.60706	0	0.332148	0.891804	0.12562	0.0805161	0.423179	0.427096	0.0914652	0.199197	0.0629134	0	0.208249	0	0	0	0.259791	0.132665	0.0693884	0.0727842	0	0	0	21
osa-miR166h-5p	GGAATGTTGGCTGGCTCGAGG	0.92242	2.05503	0.911096	0.287045	2.29176	1.04184	0.807119	1.10615	0.878269	1.20057	1.10122	0.89427	1.39792	1.70211	1.79914	4.11766	2.61127	2.40593	0.387827	0.73826	1.53716	1.81435	0.42855	0.417945	0.775011	1.1662	0.18843	0.322064	1.10026	1.28129	1.28051	2.19116	1.06953	0.795332	1.11066	1.19542	0.987943	0.795642	1.3639	1.79098	1.04083	0.946195	0.974442	0.573713	0.964278	21
osa-miR166i-3p	TCGGATCAGGCTTCATTCCTC	0.409964	0.479507	0.248481	0.215284	0.0954899	0.148834	0.146749	0.195203	0.365945	0.500237	0.194333	0.521657	0.55917	0.222015	0.599715	0.280749	0.326408	0.49778	0.0775653	0.073826	0.192145	0.907173	0.214275	0.27863	0.221432	0.343001	0.18843	0	0.0846357	0.0854192	0.365861	0.531191	0.314567	0	0.0694163	0.281274	0	0.306016	0.259791	0.331664	0.0693884	0	0.524699	0.245877	0.350647	21
osa-miR166i-5p	AATGCAGTTTGATCCAAGATC	0.512456	0.548008	0.745442	0.430567	0.954899	0.148834	0.146749	0.715743	0.146378	0.700331	0.194333	0.29809	0.768859	0.518035	0.824608	0.374332	0.522253	0.414816	0.0775653	0.221478	0.38429	0	0.749963	0	0.332148	0.274401	0.12562	0	0.169271	0.0854192	0.0914652	0	0	0	0.208249	0.0703186	0	0	0.0649477	0.0663327	0	0	0	0	0.0876617	21
osa-miR166j-5p	GAATGACGTCCGGTCTGAAGA	412.117	649.937	921.698	80.6596	342.618	189.316	84.2338	266.712	156.186	370.075	222.447	419.114	251.067	189.305	312.302	191.377	242.587	272.617	56.5451	86.0072	212.32	171.682	133.172	138.758	170.281	130.958	79.5803	65.5401	88.9521	77.3898	489.43	443.279	264.614	103.176	168.335	169.96	138.806	167.207	175.554	174.853	128.299	141.129	158.759	146.788	178.567	21
osa-miR166k-3p>osa-miR166l-3p	TCGGACCAGGCTTCAATCCCT	263.402	407.101	368.331	47.2188	221.728	214.023	190.48	251.421	156.112	269.327	159.936	279.31	267.703	236.298	378.945	121.845	127.56	171.983	39.0154	24.2149	100.492	92.5316	44.9978	49.5962	175.927	142.551	39.8844	42.432	56.3674	67.652	92.2884	175.691	142.499	63.1204	82.8831	89.7265	95.1389	106.065	124.375	143.809	85.4865	84.5752	93.6963	89.7451	121.937	21
osa-miR166k-5p	GGTTTGTTGTCTGGCTCGAGG	0.204982	0.411006	0.662615	0.143522	0.572939	0.22325	0.146749	0.26027	0	0.600284	0.388667	0.223567	0.209689	0.222015	0.299857	1.02941	0.718098	1.32741	0	0.147652	0.192145	0	0.321413	0.139315	0	0.343001	0	0	0	0	0.548791	0.59759	0.37748	0.578423	0.208249	0.562549	0.592766	0.489626	0.194843	0.928658	0.763272	0.582274	0.449742	0.655672	0.52597	21
osa-miR166l-5p	GGATTGTTGTCTGGTTCAAGG	0.307473	0.205503	0.331308	0.0717612	0.0954899	0	0	0	0.0731891	0.500237	0.259111	0.0745225	0.349481	0.14801	0.149929	0.467916	0.326408	0.0829633	0.0775653	0	0	0.226793	0.107138	0	0	0	0	0	0.0846357	0	0	0.199197	0.125827	0	0	0	0	0.122406	0.0649477	0.0663327	0.0693884	0	0.149914	0.163918	0.0876617	21
osa-miR166m	TCGGACCAGGCTTCATTCCCT	533.364	666.994	695.663	86.3287	645.225	376.103	488.16	603.111	298.758	547.559	374.156	714	512.829	528.543	738.024	237.14	299.251	243.58	48.0129	79.0676	125.086	136.529	51.5332	109.92	349.087	222.471	119.904	84.7029	120.437	91.7403	128.509	334.916	331.428	136.942	153.549	209.268	107.291	238.08	157.368	276.939	203.586	177.157	175.699	141.297	242.297	21
osa-miR167a-3p	ATCATGCATGACAGCCTCATTT	5.43203	0.274004	0.496962	0.287045	4.29705	3.57201	2.20123	3.12324	1.97611	3.40161	1.36033	0.0745225	6.98962	0.962064	9.52048	5.14707	10.3798	7.30077	2.0167	2.58391	7.30151	5.89662	2.35703	2.92562	5.86794	5.14502	2.63802	2.09342	1.26954	2.47716	0.365861	1.65997	0.880787	0.650726	0.832996	0.632868	0.69156	0.856845	0.779373	1.19399	1.73471	0.946195	0.599657	0.491754	0.964278	22
osa-miR167a-5p>osa-miR167b>osa-miR167c-5p	TGAAGCTGCCAGCATGATCTA	646.821	128.097	342.903	24.5423	313.875	272.142	130.313	412.593	220.665	644.305	289.945	220.81	290.768	102.793	678.128	224.787	648.638	286.555	21.951	53.9668	497.848	74.8417	154.707	255.086	175.595	633.798	159.098	130.758	36.478	147.092	207.443	443.611	377.858	166.224	44.4264	141.27	51.1754	97.4967	211.275	378.893	167.642	253.216	50.2962	251.696	253.43	21
osa-miR167c-3p	GGTCATGCTGCGGCAGCCTCACT	0	0	0	0	0.0954899	0	0.0733744	0	0.0731891	0	0	0	0	0	0.149929	0	0.0652816	0	0	0	0	0	0	0	0	0	0	0	0	0	0	0.132798	0	0	0	0	0	0	0	0	0	0	0	0	0	23
osa-miR167d-3p	GATCATGCTGTGCAGTTTCATC	5.94448	10.8917	7.7029	0.789373	6.77978	2.30692	1.39411	4.09925	1.75654	9.80464	5.11744	4.62039	7.12942	3.77425	7.34651	0.374332	1.10979	1.5763	0.387827	0.442956	0.192145	0.680379	0	0.417945	0.553579	1.37201	0.75372	0.241548	0.338543	0.256258	1.46344	0.796786	1.06953	0.723029	0.416498	0.351593	1.6795	0.795642	0.519582	1.06132	1.11021	1.16455	0.449742	0.901549	1.05194	22
osa-miR167d-5p>osa-miR167e-5p>osa-miR167f>osa-miR167g>osa-miR167h-5p>osa-miR167i-5p>osa-miR167j	TGAAGCTGCCAGCATGATCTG	698.477	671.447	549.64	93.6483	1113.13	531.485	555.958	538.759	334.621	759.86	428.699	455.854	1046	651.243	826.107	1688.33	1261.31	1629.81	208.263	229.451	545.308	892.431	210.633	325.022	950.496	764.138	319.263	208.295	343.282	283.421	337.324	686.298	678.269	271.353	347.568	314.395	570.932	487.361	307.982	774.567	873.322	612.843	508.209	323.902	297.261	21
osa-miR167e-3p>osa-miR167i-3p	AGATCATGTTGCAGCTTCACT	17.2185	36.648	26.5874	7.46316	17.9521	16.7438	19.9578	19.5203	15.8088	17.6083	13.2147	18.1835	18.7322	12.6548	31.8599	19.2781	15.537	23.8934	2.86992	4.28191	10.1837	6.35021	4.71405	6.26918	9.52156	11.4562	4.52232	3.86477	3.30079	4.35638	3.10982	7.83506	3.7748	2.5306	1.87424	2.81274	4.24815	2.50933	3.11749	4.44429	3.88575	4.43984	2.47358	2.70465	4.1201	21
osa-miR167h-3p	AGGTCATGCTGTAGTTTCATC	87.6299	54.0473	73.4675	14.2087	232.327	107.532	104.118	212.12	75.0188	185.888	107.79	88.011	214.861	131.803	280.142	231.431	199.109	275.189	11.9451	19.7115	81.0852	49.4409	56.1401	57.3978	63.4402	94.1882	34.5455	25.6041	32.8387	34.5948	250.706	286.179	258.888	42.2249	34.7082	64.9041	24.8962	22.7064	28.7718	107.459	65.919	105.61	27.4343	27.0465	29.805	21
osa-miR168a-3p	GATCCCGCCTTGCACCAAGTGAAT	477.609	477.794	482.715	77.7891	577.332	368.81	393.214	227.021	356.211	594.681	381.347	541.331	251.696	215.502	251.73	148.704	154.326	175.467	54.6835	104.242	160.825	101.377	80.1389	84.2856	153.674	208.819	67.7092	62.1584	61.107	53.1308	103.173	188.042	158.667	97.392	127.379	139.301	156.688	159.985	184.192	235.282	180.826	145.204	154.262	164.492	147.535	24
osa-miR168a-5p	TCGCTTGGTGCAGATCGGGAC	610.54	749.538	738.568	219.804	901.138	689.025	529.103	351.69	740.747	897.625	469.121	670.255	423.711	319.849	403.833	300.402	289.524	327.456	74.773	114.578	252.094	232.009	155.671	190.304	236.268	330.516	90.8233	87.9236	85.5667	70.9834	118.356	229.342	198.24	120.24	166.599	152.943	242.836	228.716	243.099	338.828	253.268	204.451	202.834	216.699	195.748	21
osa-miR169a	CAGCCAAGGATGACTTGCCGA	7.27687	0.959014	0.745442	0.789373	0.19098	2.2325	0.293498	0.78081	1.3174	3.70175	0.129556	2.16115	0.209689	0	0.0749644	0.374332	0	0	0.155131	0.295304	0	1.13397	0	0.696575	0.110716	0.548802	0	0.241548	0	0	0	0	0	0.0723029	0.416498	0	0.889148	0.673235	0.454634	0	0.693884	0.145568	0.299828	0.245877	1.57791	21
osa-miR169b>osa-miR169c	CAGCCAAGGATGACTTGCCGG	0.102491	2.74004	4.80396	0.215284	4.29705	0.0744168	0.66037	0.52054	0.292756	0.700331	3.498	0	1.18824	0.518035	1.49929	0.467916	0.456971	0.331853	0	0.147652	0.76858	0	0.857101	0.139315	1.21787	0.480202	0.12562	0.0805161	0.253907	0	0.18293	0.265595	0	0.361515	0	0.562549	0.296383	0.122406	1.03916	0.0663327	0.0693884	0.145568	0.224871	0.327836	0.0876617	21
osa-miR169d	TAGCCAAGGATGAATTGCCGG	0.102491	0	0.165654	0	0	0	0	0	0.146378	0	0	0	0	0	0	0	0	0	0	0	0	0	0	0	0	0	0	0	0.0846357	0	0	0	0	0	0	0	0	0	0	0	0	0	0	0	0	21
osa-miR169e	TAGCCAAGGATGACTTGCCGG	0.204982	1.16452	0.165654	0.143522	0.763919	0.744168	0	0	0	2.30109	0.194333	1.04331	0.279585	0	0	0	0.652816	2.15704	0.0775653	0	2.30574	3.85548	0	0	0	0	0	0	0	0.939612	0.18293	0.398393	0.18874	0	0.485914	0	0.0987943	0	0	0.132665	0.902049	0	1.79897	1.31134	2.10388	21
osa-miR169f.1>osa-miR169g	TAGCCAAGGATGACTTGCCTA	0.102491	0	2.48481	0	0	0	0	0	0.219567	0	1.10122	0	0.629066	0.0740049	1.64922	0.748665	0	0.165927	0.155131	0	0	0	0	3.20425	4.53935	0.0686003	0.12562	0.0805161	0	0.170838	0.0914652	0	0.0629134	0.0723029	0	0.562549	1.97589	2.44813	2.33812	0	0.0693884	0.727842	0	0.409795	0	21
osa-miR169f.2	TGAGGACAAGAGCTGATTCGG	0	0	0.0828269	0	0.0954899	0	0.0733744	0.26027	0.0731891	0.100047	0.0647778	0.149045	0.139792	0.222015	0	1.31016	2.28486	3.1526	0.0775653	0.73826	3.07432	0.680379	1.17851	0.835891	0.885727	0.823203	0.18843	0.563613	0.677086	1.36671	1.37198	1.39438	2.64236	1.22915	1.18008	0.351593	2.07468	2.14211	0.909268	1.98998	1.94288	0.800626	1.64906	1.8031	1.49025	21
osa-miR169h>osa-miR169i-5p.1>osa-miR169j>osa-miR169k>osa-miR169l>osa-miR169m	TAGCCAAGGATGACTTGCCTG	3.99715	0	0	0.287045	0.572939	0	0.146749	0.325338	0.0731891	0	0	0	0	0	0	0.374332	0.0652816	0.0829633	0	0.73826	0	0	1.28565	0	0	2.67541	0.50248	0.563613	0.507814	0.0854192	0.18293	0	0	0.578423	0.0694163	0.140637	0	0	0.194843	0	0	0	0.149914	0	0	21
osa-miR169i-3p	TGAGTCGCTCTTATCACTCATG	107.206	63.7744	117.697	11.5535	62.8324	57.2265	54.664	25.3113	41.3518	94.2446	71.9681	59.767	39.0021	14.1349	43.5543	182.113	194.213	303.646	70.8171	74.8595	123.549	84.5938	58.6043	85.6788	187.885	135.211	123.736	72.1424	58.3986	73.4605	58.3548	76.4915	47.94	50.5397	52.6176	59.7708	60.1657	48.9626	38.7088	57.6431	97.8376	93.6733	52.32	53.0274	39.4477	22
osa-miR169i-5p.2	TGGTGATAAGGGTGTAGCTCTG	21.7281	8.28862	24.0198	3.01397	14.1325	16.6694	14.0145	4.09925	12.5153	26.6126	17.8139	17.1402	5.31211	1.5541	4.198	13.2888	16.8427	21.9853	12.7983	41.6378	39.3897	23.5865	19.499	28.6989	79.7154	58.9962	39.1307	26.3288	15.9962	30.9218	20.7626	34.129	15.8542	18.0034	16.174	27.7759	24.5998	25.2157	22.5369	40.3303	54.6087	37.7022	23.0868	25.5712	17.62	22
osa-miR169n>osa-miR169o	TAGCCAAGAATGACTTGCCTA	0.204982	0	0.0828269	0	0	0	0	0	0	0.100047	0	0	0	0	0	0	0.0652816	0.0829633	0.0775653	0.147652	0.38429	0	0.107138	1.11452	0.553579	0.205801	0.06281	0	0	0	0	0.132798	0	0	0	0.632868	0.197589	0.0612032	0.0649477	0	0.138777	0.0727842	0.0749571	0	0.262985	21
osa-miR169p	TAGCCAAGGACAAACTTGCCGG	0	0.205503	0.0828269	0	0	0	0	0	0	0	0	0	0	0	0	0	0.0652816	0.165927	0	0	0	0	0	0	0	0	0	0	0.169271	0	0	0.132798	0	0	0	0.140637	0.197589	0	0.0649477	0.0663327	0	0.0727842	0.0749571	0.081959	0	22
osa-miR169q	TAGCCAAGGAGACTGCCCATG	2.15231	0.411006	1.57371	0.502328	0.859409	0.446501	0.293498	0.195203	0.365945	2.20104	1.03644	0.521657	0.419377	0.14801	0.374822	1.6845	2.35014	2.65482	0.155131	0.516782	2.1136	1.58755	1.60706	1.11452	1.77145	1.2348	0.50248	0.161032	0.423179	0.683354	0.914652	1.85917	1.38409	1.59066	1.31891	2.17988	1.38312	1.65249	4.02676	2.25531	3.81636	2.40188	1.79897	3.77011	2.10388	21
osa-miR169r-3p	TGGCAAGTCTCCTCGGCTACC	2.66477	0.548008	1.40806	0.0717612	0.763919	1.63717	0.66037	0.910945	0.80508	2.70128	1.55467	0.819747	1.39792	0.666044	0.749644	2.24599	1.37091	3.65038	1.00835	1.25504	8.07009	6.577	1.7142	3.34356	10.4073	3.84162	2.00992	1.20774	0.338543	0.854192	2.1037	2.12476	0.9437	1.51836	2.49899	1.33605	1.28433	1.10166	3.05254	3.91363	3.40003	3.93035	2.47358	2.62269	2.01622	21
osa-miR169r-5p	TAGCCAAGGATGATTTGCCTG	0	0.068501	0.165654	0	0	0	0	0	0	0	0	0.0745225	0.0698962	0	0	0.0935831	0.0652816	0.0829633	0.0775653	0.295304	0.960725	0.226793	0.749963	0.139315	0.332148	0	0.25124	0.0805161	0	0	0.18293	0.0663988	0	0	0.0694163	0	0.0987943	0	0.324739	0.0663327	0.208165	0.218353	0.374785	0	0.175323	21
osa-miR171a	TGATTGAGCCGCGCCAATATC	0.512456	0.274004	0.331308	0.0717612	0.38196	0	0.146749	0.0650675	0.0731891	0.100047	0.129556	0.29809	0.279585	0.370025	0.224893	0.280749	0.195845	0.165927	0	0	0	0.680379	0	0.139315	0.221432	0.205801	0.06281	0	0	0	0	0.331994	0.0629134	0.0723029	0	0.140637	0	0.122406	0	0.132665	0	0.0727842	0	0	0	21
osa-miR171b>osa-miR171c-3p>osa-miR171d-3p>osa-miR171e-3p>osa-miR171f-3p	TGATTGAGCCGTGCCAATATC	25.3153	47.9507	43.567	6.81731	28.3605	9.89744	8.07119	28.0441	11.7834	27.3129	19.5629	29.5854	37.3246	23.0155	38.3068	33.7835	31.7269	28.2905	10.3938	7.60407	23.0574	26.308	11.0352	10.17	21.036	22.5695	5.52728	3.54271	5.41669	4.10012	7.68308	19.2557	15.4767	6.65187	11.3149	9.63365	10.9662	11.3226	9.22258	22.6858	13.8777	13.2467	9.36963	7.7861	8.94149	21
osa-miR171c-5p	GGATATTGGTGCGGTTCAATC	0.204982	0.479507	0.414135	0.0717612	0	0	0	0.26027	0	0.200095	0	0.149045	0.489274	0.222015	0.374822	0	0.195845	0	0	0.073826	0	0	0	0	0	0.137201	0	0	0	0	0.18293	0.265595	0.0629134	0	0	0	0	0.18361	0.0649477	0.397996	0.0693884	0	0.0749571	0	0.175323	21
osa-miR171d-5p	TGTTGGCCCGGCTCACTCAGA	3.27972	2.60304	3.14742	0.215284	1.71882	1.3395	1.02724	1.82189	0.80508	2.10099	1.10122	0.89427	2.51626	2.66418	2.39886	0.187166	0.652816	1.16149	0.232696	0.664434	0.576435	1.58755	0.42855	0.417945	0.332148	0.960404	0.18843	0	0.338543	0.341677	0	0.464792	0.251653	0.361515	0.277665	0.703186	0.197589	0.489626	0.519582	0.464329	0.138777	0.436705	0.149914	0.491754	0.262985	21
osa-miR171e-5p	TGTTGGCTCGGCTCACTCAGA	1.84484	1.43852	1.98785	0.143522	1.71882	1.19067	0.733744	3.05817	1.09784	1.10052	1.42511	2.45924	3.56471	3.10821	3.59829	1.21658	1.4362	1.41038	0.232696	0.147652	0.76858	1.58755	1.17851	1.53247	1.10716	1.44061	0.12562	0.161032	0.507814	0.512515	0.823187	0.863185	0.9437	0.723029	2.70724	0.703186	2.56865	2.26452	1.68864	2.32165	1.11021	1.16455	1.42418	1.22938	3.68179	21
osa-miR171f-5p	TGTTGGCATGGTTCAATCAAA	0	0	0	0	0	0	0	0.0650675	0	0	0	0	0	0	0	0	0	0	0	0	0	0	0	0	0	0	0	0	0	0	0	0	0	0	0	0	0	0	0	0	0	0	0	0	0	21
osa-miR171g	GAGGTGAGCCGAGCCAATATC	0.102491	0	0.165654	0	0	0	0	0	0	0	0.194333	0	0	0	0	0.0935831	0	0	0	0	0	0	0.107138	0	0	0	0	0	0	0	0	0.331994	0.0629134	0	0	0.0703186	0	0.122406	0	0.0663327	0.0693884	0.145568	0.0749571	0	0	21
osa-miR171h	GTGAGCCGAACCAATATCACT	0.307473	0.342505	0.248481	0.0717612	0.0954899	0.0744168	0.220123	0	0.146378	0	0	0.29809	0.209689	0	0.299857	0.374332	0.0652816	0.165927	0	0.073826	0	0.226793	0.214275	0.417945	0.332148	0.137201	0.06281	0.0805161	0	0	0	0.331994	0.0629134	0.0723029	0.0694163	0	0.493971	0.18361	0	0.265331	0.138777	0	0	0.081959	0.0876617	21
osa-miR171i-3p	GGATTGAGCCGCGTCAATATC	0.512456	0.548008	1.40806	0.0717612	0.572939	0.22325	0.146749	0.52054	0.0731891	0.700331	0.259111	0.521657	0.55917	0.222015	0.299857	1.31016	0.587535	0.995559	0.0775653	0.073826	0.38429	0.453586	0.321413	0.975206	0.775011	0.205801	0.12562	0	0	0.0854192	0.0914652	0.132798	0.18874	0.144606	0	0.0703186	0.197589	0	0.324739	0.397996	0.41633	0	0.449742	0	0	21
osa-miR171i-5p	AGGTATTGGCGTGCCTCAATC	0	0	0	0	0.0954899	0	0	0.130135	0	0	0	0	0	0	0.149929	0.0935831	0	0	0	0	0	0	0	0	0	0	0	0	0	0	0	0	0	0	0	0	0	0	0	0	0	0	0	0	0	21
osa-miR172a>osa-miR172d-3p	AGAATCTTGATGATGCTGCAT	6.8669	22.8108	17.9734	4.95152	9.93095	7.44168	3.4486	17.5032	4.75729	9.00426	6.21867	9.91149	21.5979	11.9888	23.164	13.0081	7.70323	13.523	3.64557	3.02686	5.9565	7.93776	2.78558	4.04014	6.20009	4.80202	2.26116	0.966193	0.59245	1.02503	2.28663	5.7103	3.90063	1.51836	3.54023	1.47669	3.4578	1.8361	1.68864	5.90361	4.1633	3.85756	2.6235	1.63918	2.01622	21
osa-miR172b	GGAATCTTGATGATGCTGCAT	0.204982	0.479507	0.0828269	0	0	0.0744168	0	0.130135	0.439135	0.100047	0.194333	0	0.0698962	0.14801	0.299857	0	0.0652816	0	0	0	0	0	0	0	0.110716	0	0.06281	0.161032	0	0	0	0.0663988	0	0	0	0	0.296383	0	0.0649477	0	0	0	0	0.081959	0	21
osa-miR172c	TGAATCTTGATGATGCTGCAC	0	0	0	0	0	0	0.146749	0.0650675	0	0	0.194333	0	0	0	0.0749644	0.187166	0	0.0829633	0	0	0	0	0	0.139315	0	0.480202	0	0	0	0	0.0914652	0	0	0.0723029	0	0	0	0.0612032	0.0649477	0.0663327	0	0	0	0.245877	0.0876617	21
osa-miR172d-5p	GCAGCACCATCAAGATTCAC	0.307473	0.68501	0.662615	0.0717612	0.38196	0.0744168	0.220123	0.390405	0.146378	0.500237	0.583	0.745225	0.349481	0.222015	0.899572	0.842248	0.652816	0.912596	0	0.36913	0	0	0.535688	0.417945	1.21787	1.0976	0.43967	0.161032	0.253907	0	1.00612	1.65997	2.39071	0.578423	1.11066	0.843823	1.87709	1.65249	1.68864	2.12265	1.45716	1.45568	1.0494	1.8031	1.49025	20
osa-miR1846a-3p>osa-miR1846b-3p	TGACCCCGTTCTCCTCGCCGG	0.307473	0	0.331308	0.0717612	0.0954899	0.148834	0.0733744	0.0650675	0.0731891	0.200095	0.0647778	0.223567	0.139792	0.14801	0	0	0.0652816	0.24889	0.155131	0	0	0	0	0	0.110716	0.0686003	0.12562	0	0.0846357	0.0854192	0	0.398393	0.0629134	0.144606	0.0694163	0.0703186	0.0987943	0.244813	0.714425	0.0663327	0.277554	0.363921	0.0749571	0.327836	0.175323	21
osa-miR1846a-5p>osa-miR1846b-5p>osa-miR1846c-5p	AGTGAGGAGGCCGGGGCCGCT	0.102491	0.205503	0.248481	0.0717612	0.19098	0	0.146749	0.26027	0.0731891	0.100047	0	0.0745225	0	0.0740049	0	0	0.0652816	0.49778	0.0775653	0	0.192145	0	0	0.27863	0	0.274401	0.06281	0.0805161	0	0	0.0914652	0.0663988	0.125827	0.0723029	0.0694163	0.0703186	0.395177	0.612032	0.389686	0.265331	0.0693884	0	0.149914	0.163918	0.175323	21
osa-miR1846d-3p	TATCCGGCGCCGCAGGGAGG	0.717438	0.411006	0.579789	0.143522	1.24137	0	0.293498	0.195203	0.365945	0.800379	0.518222	0.670702	0.55917	0	0.224893	0.561499	0.39169	0.49778	0	0	0.192145	0	0.321413	0.139315	0.664295	0.137201	0.18843	0.0805161	0.0846357	0.256258	0	0	0.251653	0	0	0	0	0	0.0649477	0.596994	0.277554	0.291137	0.0749571	0.081959	0	20
osa-miR1846d-5p	TCCCACCGAGCAGCCGGATCTC	1.94733	1.78103	1.40806	0.215284	1.24137	0.520918	0.733744	2.86297	0.80508	1.7008	1.03644	1.26688	2.86575	2.44216	2.02404	1.49733	1.37091	0.995559	1.08591	0.147652	1.92145	2.94831	1.07138	0.975206	2.32503	1.37201	0.50248	0.322064	0.338543	0.512515	0.823187	1.19518	0.9437	0.433817	0.76358	0.632868	0.296383	0.550829	0.714425	1.52565	0.693884	0.727842	0.524699	0.245877	0.788955	22
osa-miR1846e	CAACGAGGAGGCCGGGACCA	0	0	0	0	0.0954899	0	0	0.0650675	0	0	0	0.149045	0	0.0740049	0.149929	0	0.0652816	0	0	0	0.192145	0.453586	0.107138	0	0	0	0	0	0	0.0854192	0.0914652	0.199197	0.0629134	0.144606	0.0694163	0.0703186	0.296383	0.428422	0.129895	0.198998	0.208165	0	0.0749571	0.163918	0.0876617	20
osa-miR1847.1	TGCAGTTTGCAGTTGTGGCAC	0	0.137002	0	0	0	0	0	0.0650675	0	0	0	0	0.0698962	0	0.0749644	0	0	0	0	0	0	0	0	0	0	0	0.06281	0	0	0	0	0.0663988	0	0	0	0	0	0.0612032	0	0	0.0693884	0.145568	0	0	0.0876617	21
osa-miR1848	CCTCGCCGGCGCGCGCGTGCA	0.409964	0.890513	0.828269	0.502328	1.52784	0.446501	0.293498	0.52054	0.292756	0.700331	0.906889	0.149045	0.419377	0.222015	0.0749644	0	0	0.24889	0.155131	0.147652	0	0.226793	0	0.835891	0.110716	0.137201	0.06281	0.161032	0.169271	0	0.18293	0.796786	0.18874	0.216909	0.416498	0.210956	0.69156	0.979251	0.454634	0.862325	0.277554	0.363921	0.599657	1.14743	1.1396	21
osa-miR1849	TATCGTATCCTAGGTTGGTTT	2.3573	1.78103	1.90502	0.358806	0.859409	0.818585	1.39411	1.36642	0.878269	1.9009	1.55467	1.3414	0.978547	0.518035	2.02404	1.123	0.979225	2.15704	0.0775653	0.442956	0.576435	0.453586	0.107138	0.55726	1.77145	1.57781	0.50248	0.724645	0.253907	0.341677	1.09758	0.796786	1.63575	0.50612	0.485914	0.421912	1.87709	0.795642	0.519582	0.464329	0.346942	1.09176	1.0494	1.22938	0.876617	21
osa-miR1850.1	TGGAAAGTTGGGAGATTGGGG	15.1687	14.2482	15.4886	2.29636	24.9229	8.11143	7.48419	9.69506	8.85588	20.2096	12.4373	14.7554	11.6727	9.91666	9.14565	40.6151	31.531	35.2594	8.68731	7.6779	22.8653	13.6076	5.03547	9.47343	21.7003	23.4613	8.66778	7.0049	8.12503	6.2356	39.1471	63.2117	55.8042	23.7154	19.7837	24.2599	14.0288	16.6473	18.9647	47.6269	40.9392	51.5312	20.5382	19.916	23.318	21
osa-miR1850.2	TTGTGTGTGAACTAAACGTGG	0	0	0.0828269	0	0	0	0	0	0	0.200095	0	0	0	0	0	0	0.0652816	0	0	0.073826	0	0	0	0	0	0	0	0	0	0	0.0914652	0.0663988	0	0	0	0	0.0987943	0	0	0.132665	0.0693884	0.0727842	0	0	0.0876617	21
osa-miR1850.3	CTGTTTAGTTCACATCAATCTT	0	0.068501	0.248481	0	0.19098	0.0744168	0	0	0	0.100047	0	0.0745225	0.0698962	0	0	0.187166	0.195845	0.24889	0	0	0	0.226793	0	0	0	0.0686003	0	0	0	0	0	0.331994	0.314567	0	0.0694163	0	0.296383	0.0612032	0.129895	0	0.0693884	0	0.0749571	0	0	22
osa-miR1851	CGTCTGGGATGGCATTTTGGC	0	0	0	0	0	0	0	0	0	0	0	0	0	0	0	0	0	0	0	0	0	0	0	0	0	0	0	0	0	0	0.640256	0.995983	0.880787	0.216909	0.138833	0.140637	0.395177	0.122406	0.194843	1.06132	0.624496	0.509489	0.224871	0.573713	0.262985	21
osa-miR1852	ATATGGATTCAGAATGCAGGT	0.102491	0	0	0.143522	0.0954899	0.148834	0	0	0	0.200095	0.0647778	0.0745225	0	0	0.0749644	0.0935831	0	0.165927	0	0	0	0	0	0	0.332148	0.274401	0.06281	0.0805161	0	0	0.0914652	0.132798	0	0	0	0.0703186	0	0	0.0649477	0.0663327	0	0.145568	0	0.081959	0	21
osa-miR1853-5p	AGCATTCAAACATTCCCAATTACC	0	0	0	0	0	0	0	0	0	0	0	0	0.0698962	0	0	0	0	0	0	0	0	0	0	0	0	0	0	0	0	0	0	0	0	0	0	0	0	0.122406	0	0	0	0	0	0	0	24
osa-miR1854-5p	TGGTGAAATTTGTAGATTGGA	0.102491	0	0	0	0	0	0	0	0	0	0	0	0	0	0	0	0	0	0	0	0	0	0	0	0	0	0	0	0	0	0	0	0	0	0	0	0	0	0	0	0	0	0	0	0	21
osa-miR1856	TATGCGTAAGACGGATTCGTA	0.307473	0.411006	0.579789	0.287045	0.668429	0.297667	0.880493	0	0.146378	1.00047	0.259111	0.372612	0.0698962	0	0.0749644	0.0935831	0.0652816	0.414816	0.0775653	0	0	0	0	0	0	0	0.31405	0.0805161	0	0	0.640256	1.26158	2.13905	0.433817	0.138833	0.281274	0.69156	0.306016	0.389686	1.45932	0.832661	1.45568	1.0494	0.409795	1.22726	21
osa-miR1857-3p	TCATGCTCCAAGAAAACCAGG	9.63416	9.72714	9.93923	2.08107	12.7956	6.54868	6.75045	7.54783	6.80659	11.3054	9.39278	11.3274	8.73703	6.43843	7.49644	2.90108	2.28486	2.07408	1.00835	3.76512	5.76435	2.49472	1.60706	2.7863	4.8715	3.08701	2.07273	1.69084	1.10026	3.07509	4.84766	3.71833	3.14567	3.61515	2.70724	4.9223	5.92766	5.50829	5.06592	3.05131	4.92658	5.24046	6.89605	8.27785	5.78567	21
osa-miR1857-5p	TGGTTTTTTTGGAGCATGAGG	0.102491	0.616509	0.496962	0.143522	3.24666	1.41392	1.10062	1.04108	0.658702	1.00047	1.23078	2.08663	1.46782	1.40609	1.49929	3.64974	2.93767	2.90371	0.387827	1.40269	2.30574	0.907173	0.321413	0.975206	1.43931	1.64641	1.19339	0.40258	1.26954	1.19587	4.93912	5.5775	6.1026	2.89212	1.80482	4.28944	1.87709	1.65249	1.03916	4.0463	4.85719	5.45881	2.17375	1.55722	1.57791	21
osa-miR1859	TTTCCTATGACGTCCATTCCAA	0.512456	0.205503	0.496962	0.0717612	0.19098	0.22325	0.293498	0.325338	0	0.200095	0.129556	0.372612	0.139792	0.29602	0.449786	0.280749	1.17507	0.829633	0	0.221478	0.38429	0.453586	0.214275	0.417945	0.221432	0.548802	0.12562	0.0805161	0.0846357	0.427096	0	0.331994	0.251653	0.216909	0	0.0703186	0	0.18361	0.129895	0.397996	0.138777	0	0.149914	0.163918	0.175323	22
osa-miR1860-3p	ATCTGGAAGCTAGGTTTTCTCT	0.512456	0.548008	0.331308	0	0.38196	0.148834	0.807119	0.650675	0.365945	0.700331	0.194333	0.745225	0.349481	0.222015	0.524751	0.374332	0.326408	0.165927	0.155131	0.221478	0.38429	0	0	0	0.110716	0.0686003	0.18843	0.161032	0.338543	0.256258	1.73784	2.19116	1.82449	1.44606	1.45774	1.96892	2.86503	2.20332	1.68864	1.52565	3.19187	2.11074	1.27427	1.63918	2.45453	22
osa-miR1860-5p	AGAAAACCAGCTTCCAGATCT	0.204982	0.068501	0.331308	0	0	0	0	0.0650675	0	0.100047	0	0	0.0698962	0	0.0749644	0.0935831	0.130563	0	0	0	0	0	0.107138	0.139315	0.221432	0	0	0	0	0	0	0.265595	0.440394	0.361515	0.277665	0.281274	0.0987943	0.306016	0.129895	0.198998	0.208165	0.145568	0.0749571	0	0.0876617	21
osa-miR1861a>osa-miR1861o	TGATCTTGAGGCAGAAACTGAG	0	0	0	0	0	0	0	0	0	0	0	0	0	0	0	0	0	0	0	0	0	0	0	0	0	0	0	0	0	0	0	0	0	0	0	0	0	0	0	0	0	0	0	0.163918	0	22
osa-miR1861b>osa-miR1861f>osa-miR1861i>osa-miR1861l	CGATCTTGAGGCAGGAACTGAG	0	0.068501	0	0	0	0	0	0.26027	0	0.100047	0	0.0745225	0	0.222015	0	0.280749	0.195845	0.331853	2.24939	1.47652	5.9565	1.58755	3.21413	1.53247	2.32503	0.480202	1.19339	0.885677	0.338543	0.512515	1.8293	0.863185	1.82449	0.433817	6.66397	0.281274	4.54454	2.38692	0.454634	4.51063	0.346942	0.509489	1.27427	0.573713	4.38308	22
osa-miR1861c	CGATCTTGTAGCAAGAACTGAG	0	0	0	0	0	0	0	0	0	0	0	0	0	0	0	0	0	0	0.0775653	0	0.192145	0	0	0	0	0	0	0	0	0	0	0	0.125827	0	0.138833	0	0.0987943	0	0	0	0	0	0	0	0.0876617	22
osa-miR1861d	TGGTCTTGAGGCAGGAACTGAG	0	0	0	0	0	0	0	0	0	0	0	0	0	0	0.0749644	0	0	0	0.0775653	0	0	0	0	0	0	0	0	0	0	0	0	0	0	0	0.138833	0	0	0	0	0	0	0	0.0749571	0	0	22
osa-miR1861e>osa-miR1861k>osa-miR1861m	CGGTCTTGTGGCAAGAACTGAG	0.307473	0.68501	0.165654	0.143522	0.28647	0	0	0.0650675	0	0.100047	0.323889	0.149045	0.209689	0	0	0.280749	0	0.0829633	0.155131	0.073826	0	0	0.107138	0	0.553579	0.343001	0.12562	0.241548	0.0846357	0.170838	0	0.199197	0.314567	0.0723029	0	0.140637	0.296383	0.0612032	0.0649477	0.198998	0.138777	0.145568	0.149914	0.245877	0	22
osa-miR1861h>osa-miR1861j	CGGTCTTGAGGCAGGAACTGAG	0.614947	0.411006	2.07067	0.0717612	1.52784	1.11625	1.24737	6.18141	1.17103	1.80085	1.10122	1.19236	6.84983	4.07027	5.32247	2.24599	0.587535	4.14816	8.84245	3.10069	6.53293	7.93776	5.35688	1.39315	11.7359	11.319	3.32893	2.0129	0.930993	2.81883	4.66473	4.44872	1.13244	1.66297	13.3973	2.10956	4.54454	11.2614	4.09171	13.1339	4.51025	2.47466	6.89605	4.17991	11.3084	22
osa-miR1861n	CGATCTTGTGGCAGGAGCTGAG	0	0	0	0	0	0	0.0733744	0.390405	0	0.100047	0	0.149045	0.0698962	0.14801	0.149929	0.0935831	0	0	0	0	0.192145	0	1.82134	1.11452	0.664295	0.0686003	0.12562	0	0.169271	0.0854192	0	0	0	0	0.138833	0	0	0	0	0	0	0	0	0	0	22
osa-miR1862a>osa-miR1862b>osa-miR1862c	ACGAGGTTGGTTTATTTTGGGACG	3.4847	6.23359	7.20594	2.72692	7.83017	7.29285	5.94333	10.7361	6.14788	6.60313	4.59922	9.09174	9.57578	11.0267	9.29558	11.5107	9.79225	10.4534	5.27444	4.42956	6.72508	4.76266	3.85695	5.43329	8.63584	9.94704	5.08761	3.22064	5.16278	4.35638	9.42092	11.6862	9.49992	5.56732	4.65089	5.55517	5.43368	6.12032	8.5731	13.9299	9.02049	9.17081	7.34579	9.01549	7.27592	24
osa-miR1862d	ACTAGGTTTGTTTATTTTGGGACG	137.543	311.337	279.292	86.4004	285.515	326.541	275.594	376.936	270.141	261.624	221.346	374.55	370.59	407.841	341.388	293.57	284.954	321.649	97.422	144.625	192.721	156.941	103.495	115.214	256.196	281.398	173.167	114.413	127.292	171.18	360.83	509.013	585.157	218.789	204.292	251.53	279.193	234.898	239.787	581.473	403.424	452.79	388.053	323.656	266.141	24
osa-miR1862e	CTAGATTTGTTTATTTTGGGACGG	73.0762	163.58	159.028	43.7026	185.25	262.989	247.492	198.456	284.193	164.678	153.135	255.239	194.871	218.907	182.463	62.4199	60.0591	56.3321	70.1966	95.3831	108.754	84.3671	62.9969	55.5867	114.591	104.135	97.1043	86.9574	109.011	130.606	123.021	96.6767	62.5359	95.5845	91.5601	141.762	86.7414	102.577	98.4607	83.8446	102.001	89.5973	168.204	123.922	115.363	24
osa-miR1862f>osa-miR1862g	ATGAGGTTGGTTTATTTTGG	0	0	0	0	0	0	0	0.0650675	0	0	0	0.0745225	0	0	0.149929	0.0935831	0	0.0829633	0	0	0	0	0.107138	0	0	0	0	0	0	0	0	0	0	0	0	0	0	0	0.129895	0	0.0693884	0	0.0749571	0	0	20
osa-miR1863a	AGCTCTGATACCATGTTAGATTAG	1.33238	5.95959	4.38983	1.57875	4.20156	4.98593	4.69596	4.29446	4.53772	3.40161	4.21056	3.87517	6.22077	4.21828	3.89815	2.05883	1.63204	1.99112	2.09426	2.51008	1.92145	3.62869	2.99985	2.7863	2.87861	3.15561	4.20827	2.0129	2.96225	2.13548	4.84766	4.58152	3.46023	3.90436	6.10864	5.62549	6.32283	4.83505	5.39066	5.30662	5.82863	4.43984	7.49571	7.95002	5.52268	24
osa-miR1863b	AGCTCTGATACCATGTTAACTGTT	0	0.137002	0.414135	0.0717612	0.19098	0.22325	0.0733744	0.195203	0.0731891	0	0.194333	0	0.419377	0.370025	0.224893	0.374332	0.195845	0.331853	0.0775653	0.073826	0	0	0.107138	0.139315	0	0.274401	0.12562	0.161032	0.169271	0.0854192	0.274396	0.265595	0.125827	0.0723029	0	0	0.0987943	0.0612032	0.0649477	0.0663327	0	0.145568	0	0	0	24
osa-miR1863b.2	AGAGACTTGGCTGATGCATTACT	0.717438	0.822012	0.496962	0.0717612	1.24137	0.595334	1.17399	0.195203	0.80508	1.80085	0.583	1.11784	0.838755	0.370025	0.824608	1.77808	1.50148	1.41038	0.387827	0.36913	0.576435	0.226793	0.642826	0.417945	1.10716	1.1662	0.12562	0.0805161	0.507814	0.512515	0.274396	0.398393	0.880787	0.144606	0.347082	0.632868	0.790354	0.550829	0.454634	1.39299	1.11021	0.582274	0.224871	1.22938	0.613632	23
osa-miR1863c	TAGAAACTTGGCTGATGCATTACT	2.2548	3.28805	2.81612	0.430567	3.91509	4.01851	5.06284	2.53763	2.78119	3.40161	2.65589	4.91848	3.14533	2.36816	4.64779	3.36899	3.78633	4.89483	1.16348	1.40269	1.34502	1.36076	0.321413	1.11452	2.21432	2.74401	1.69587	0.885677	0.846357	1.45213	2.19516	2.78875	3.14567	0.723029	1.11066	1.47669	0.493971	1.04045	0.909268	2.65331	2.63676	2.32909	1.5741	1.14743	1.84089	24
osa-miR1864	TTGTAGTAACGTGATGGTCAATGT	0.307473	0.411006	0.248481	0.143522	1.14588	0.595334	0.880493	0.910945	0.0731891	0.600284	0.453444	0.670702	0.698962	0.44403	0.374822	1.02941	0.652816	1.82519	0.930784	0.664434	1.34502	0.453586	0.749963	0.417945	0.664295	0.960404	1.00496	0.322064	0.677086	0.597935	1.00612	0.796786	2.07614	0.795332	0.277665	0.421912	0.493971	0.550829	0.584529	1.52565	0.902049	0.509489	0.824528	0.983507	0.52597	24
osa-miR1865-3p	CGAAGAATCGCAGTCACTAGTTGT	0.102491	0.274004	0.0828269	0.215284	0.763919	0.372084	0.440247	0.455473	0.365945	0.300142	0.453444	0.59618	0.419377	0.29602	0.449786	0.467916	0.913943	1.07852	0.310261	0	0	0	0.214275	0.139315	0.664295	0.274401	0.31405	0.0805161	0.169271	0.170838	0.640256	1.32798	1.63575	0.289212	0.485914	0.351593	0.592766	0.367219	0.389686	0.530662	0.555107	0.655058	0.374785	0.327836	0.613632	24
osa-miR1865-5p	TGCTAGTGATGGTGATTCTTCGAC	0.102491	1.30152	0.911096	0.574089	0.763919	2.30692	2.20123	1.62669	2.12248	0.700331	0.842111	1.19236	1.11834	0.814054	1.19943	1.96525	0.78338	1.07852	0.310261	0.664434	0.576435	0.680379	0.214275	0.417945	0.664295	0.686003	0.43967	0.483097	0.423179	0.170838	0.640256	1.59357	2.20197	0.361515	0.208249	0.632868	0.592766	0.550829	0.194843	1.59199	1.87349	1.31012	1.0494	0.983507	0.262985	24
osa-miR1866-5p	GAGGGATTTTGCGGGAATTTCACG	0	0	0	0	0	0	0	0	0	0	0	0	0	0	0	0.0935831	0	0	0	0	0	0	0	0	0	0	0	0	0	0	0	0	0	0	0	0	0	0	0	0	0	0	0.149914	0	0	24
osa-miR1868	TCACGGAAAACGAGGGAGCAGCCA	0.819929	1.50702	1.82219	0.143522	1.62333	0.520918	0.513621	1.56162	0.219567	0.900426	0.388667	0.670702	1.95709	1.11007	1.34936	1.123	1.95845	1.99112	0.775653	0	2.1136	1.58755	0.857101	0.417945	1.77145	1.2348	0.6281	0.40258	0.930993	0.427096	0.731722	0.995983	1.32118	0.650726	0.277665	0.351593	0.592766	0.489626	1.03916	2.05631	0.832661	0.509489	0.974442	0.901549	1.49025	24
osa-miR1869	TGAGAACAATAGGCATGGGAGGTA	0	0	0.0828269	0	0.0954899	0	0	0.130135	0	0	0	0	0	0.0740049	0	0	0.0652816	0	0	0.073826	0	0	0	0	0	0	0	0	0	0	0	0.199197	0.125827	0	0.0694163	0	0.0987943	0.0612032	0.0649477	0.0663327	0	0	0	0	0.0876617	24
osa-miR1870-3p	TTTAGGGCTAATTCAGCATGAACA	0.614947	0.753511	0.414135	0.143522	0.0954899	0.297667	0.66037	0.52054	0.658702	0.600284	0.388667	0.447135	0.629066	0.814054	0.899572	0.561499	0.326408	0	0.387827	0.664434	0.576435	0.907173	0.642826	0.417945	0.553579	0.411602	0.37686	0.322064	0.253907	0.256258	0.823187	0.59759	0.440394	0.144606	0.555331	0.281274	0.493971	0.306016	0.389686	0.596994	0.41633	0.509489	0.374785	0.081959	0.350647	24
osa-miR1870-5p	TGCTGAATTAGACCTAGTGGGCAT	8.71174	10.1381	9.44227	2.00931	8.02115	3.72084	3.4486	5.27047	4.0254	6.40303	4.53444	7.89938	7.75848	8.36256	6.67183	10.2006	8.61718	11.283	2.32696	1.62417	5.18792	7.71097	3.4284	3.48288	8.52512	7.06583	3.1405	0.966193	1.60808	2.2209	3.56714	7.70226	7.48669	2.4583	3.19315	3.09402	6.22404	4.95746	4.41645	8.09259	5.06535	5.82274	6.14648	6.06496	5.34736	24
osa-miR1871	ATGGCTCTGATATCATGTTGGTTT	48.6833	87.0648	85.4774	23.1789	72.0949	72.7052	78.584	39.2357	57.7462	78.4371	62.5753	103.214	48.0187	38.5566	49.5515	52.6873	55.5547	67.3662	18.5381	20.1545	37.6604	31.751	20.7847	27.7237	53.0329	58.3788	32.2844	22.9471	25.2214	23.3195	40.8849	65.4693	64.0458	27.5474	20.8943	32.3466	31.3178	28.8879	26.9533	62.4191	53.9148	55.4616	35.0799	39.5042	33.8374	24
osa-miR1872	GAACTGTAAGTCTGTGACGGGTAA	0	0	0	0	0	0	0	0	0	0	0	0	0	0	0	0	0	0	0	0	0	0	0	0	0	0	0	0	0	0	0	0	0.0629134	0	0	0.0703186	0	0.0612032	0	0.132665	0	0	0	0.081959	0	24
osa-miR1873	TCAACATGGTATCAGAGCTGGAAG	11.7865	27.7429	22.6946	4.01863	19.8619	13.3206	11.7399	20.1709	11.8566	21.3101	13.2147	25.1141	26.2111	20.6474	20.5402	8.14173	9.85753	9.87263	4.0334	5.02017	9.99154	12.02	7.39249	6.68712	13.2859	12.6225	6.40662	3.78426	4.90887	6.06477	10.9758	17.5957	15.0363	5.85654	9.16295	10.1962	14.5228	12.9751	11.6906	20.1651	14.8491	9.97144	15.3662	11.5562	17.7953	24
osa-miR1874-3p	TATGGATGGAGGTGTAACCCGATG	0.307473	0.411006	0.414135	0.143522	1.05039	0.818585	0.586995	1.56162	0.951458	0.700331	0.259111	0.968792	0.908651	0.888059	1.42432	1.40375	3.26408	3.48446	1.00835	0.664434	4.22719	0.226793	1.07138	0.835891	1.77145	2.88121	0.87934	0.483097	0.423179	0.427096	0.823187	2.19116	2.70527	0.361515	1.18008	0.773505	0.889148	0.612032	0.584529	2.32165	0.555107	1.09176	1.12436	1.72114	0.788955	24
osa-miR1874-5p	TAGGGCTACTACACCATCCATAAG	0.102491	0.068501	0.0828269	0	0.0954899	0.148834	0	0.0650675	0.0731891	0	0	0	0.0698962	0.29602	0.224893	0.374332	0.39169	0.49778	0.387827	0.073826	0	0	0	0	0	0.274401	0.18843	0.563613	0.0846357	0.427096	0.274396	0.464792	0.440394	0	0.277665	0.0703186	0.296383	0.0612032	0.259791	0.265331	0.138777	0.436705	0.374785	0.245877	0.175323	24
osa-miR1875	ACAATGGAGTGAAGTGCAACAGAA	3.58719	4.24706	4.63831	1.43522	6.77978	2.53017	3.08173	1.82189	2.63481	6.10289	2.78544	5.14205	3.28512	3.0342	3.3734	3.27541	3.32936	4.23113	1.24104	1.55035	2.1136	3.4019	0.964238	1.25384	3.10004	2.94981	1.31901	0.724645	0.846357	0.768773	0.640256	0.796786	1.50992	0.144606	0.347082	0.49223	0.69156	0.489626	0.519582	1.52565	0.693884	0.727842	1.12436	0.81959	1.40259	24
osa-miR1876	ATAAGTGGGTTTGTGGGCTGGCCC	3.4847	8.49412	8.11704	4.30567	8.21213	14.7345	13.2808	14.7053	13.9059	8.00379	8.68022	12.0726	11.7426	13.8389	12.2942	16.7514	20.4984	17.2564	8.06679	7.16112	12.4894	7.71097	7.07108	5.01534	13.0645	13.6515	7.91406	7.0049	9.39457	8.28567	22.9578	30.4771	34.7911	11.1346	14.9245	16.103	13.0408	14.8112	13.7689	39.07	20.0532	22.0536	19.8636	11.966	16.4804	24
osa-miR1878	ACTTAATCTGGACACTATAAAAGA	3.99715	8.22012	7.45442	1.86579	4.10607	6.1766	3.96222	8.58891	5.70875	4.40208	5.57089	8.49556	9.85537	10.0647	11.1697	16.1899	17.5608	21.1556	4.65392	6.79199	9.60725	9.52531	5.99971	3.90082	11.4037	11.5934	7.78844	1.93239	2.87761	4.0147	6.40256	9.29584	6.79464	3.97666	3.60965	3.37529	6.02645	3.61099	3.63707	11.5419	7.70211	6.62336	4.94717	3.36032	4.1201	24
osa-miR1879	GTGTTTGGTTTAGGGATGAGGTGG	0.717438	1.57552	0.828269	0.645851	1.71882	1.04184	0.807119	2.01709	1.09784	1.40066	1.166	1.86306	1.60761	2.36816	1.79914	1.87166	2.67655	2.57186	1.31861	0.885912	2.30574	1.36076	0.749963	0.696575	0.996443	1.85221	0.69091	0.805161	1.10026	0.512515	1.09758	1.26158	2.32779	0.723029	0.416498	1.05478	1.48191	1.59128	0.454634	3.51563	2.22043	1.31012	0.749571	0.573713	1.75323	24
osa-miR1880	TTCCAAGCGGGCCACTTAAGCATT	0.204982	0.068501	0.248481	0.0717612	0.47745	0.148834	0.0733744	0.390405	0.146378	0.200095	0.388667	0.223567	0.419377	0.518035	0.149929	0.280749	0.261127	0.49778	0.387827	0.073826	0.38429	0.453586	0.214275	0	0.442863	0.205801	0.06281	0.241548	0.338543	0.0854192	0.274396	0.331994	0.251653	0.0723029	0.208249	0.0703186	0.296383	0.18361	0.194843	0.331664	0.346942	0.218353	0.224871	0.163918	0.0876617	24
osa-miR1881	AATGTTATTGTAGCGTGGTGGTGT	0	0	0.0828269	0	0.38196	0.22325	0.293498	0.0650675	0.0731891	0.300142	0.323889	0	0	0	0.0749644	1.02941	0.130563	0.331853	0.0775653	0	0.192145	0.453586	0.107138	0.139315	0	0.274401	0.25124	0.40258	0.338543	0	0.548791	0.59759	0.503307	0.144606	0	0	0.395177	0.306016	0	0.198998	0.208165	0.218353	0.299828	0.081959	0.0876617	24
osa-miR1882a>osa-miR1882b>osa-miR1882c>osa-miR1882d>osa-miR1882e-5p>osa-miR1882f>osa-miR1882g>osa-miR1882h	AGATTGCTTTCAAGGTCATTTCTT	0	0	0	0	0	0	0	0	0	0	0	0	0	0	0	0	0	0	0	0	0	0	0	0	0	0.0686003	0	0	0	0	0.274396	0.398393	0.314567	0.0723029	0.416498	0.281274	0.0987943	0.18361	0.259791	0.530662	0.346942	0.800626	0.0749571	0.327836	0.0876617	24
osa-miR1882e-3p	GAAATGATCTTGGACGTAATCTAG	0.204982	0.548008	0.248481	0.0717612	0.0954899	0.0744168	0	0	0.219567	0	0	0	0.0698962	0.0740049	0.299857	0	0.0652816	0	0	0.073826	0	0	0	0.139315	0.221432	5.07642	6.40662	7.40748	5.83986	8.79818	1990.74	1624.25	911.048	2071.7	1785.67	2836.79	3188.39	3072.46	2705.66	1423.23	2113.78	1959.21	3467.89	3682.66	3075.96	24
osa-miR1883a>osa-miR1883b	ACCTGTGACGGGCCGAGAATGGAA	2.56228	4.24706	4.307	1.00466	5.44292	4.91151	2.93498	4.74993	3.29351	5.30251	3.75711	5.51466	5.80139	3.99627	4.72276	4.77274	4.76556	6.05632	0.698088	0.73826	5.57221	3.1751	2.67844	2.08973	2.65718	4.18462	1.2562	1.04671	0.59245	0.768773	2.56103	3.12075	3.08275	0.795332	0.971828	0.632868	1.18553	0.550829	0.974216	2.38798	1.52654	1.09176	0.899485	0.655672	1.1396	24
osa-miR2055	TTTCCTTGGGAAGGTGGTTTC	1.43488	2.87704	2.73329	0.502328	1.9098	1.11625	1.17399	1.30135	1.02465	2.70128	1.55467	2.16115	2.72595	1.85012	1.72418	3.08824	2.28486	3.40149	0.465392	0.295304	1.34502	0.453586	0.857101	0.696575	2.1036	2.26381	0.43967	0.40258	0.253907	0.256258	1.46344	2.72235	2.07614	0.433817	1.04124	1.19542	1.97589	1.53008	1.29895	2.65331	1.8041	2.25631	1.5741	1.8031	1.66557	21
osa-miR2090	AACTCTGATTCTAGAATTTTTG	0.819929	1.37002	1.40806	0.287045	0.954899	0.669751	0.880493	0.325338	0.951458	0.700331	0.712556	0.819747	0.489274	0.14801	0.449786	2.43316	0.913943	1.65927	0.310261	0.295304	0.76858	0.453586	0.642826	0.417945	0.664295	0.891804	0.25124	0.0805161	0	0.0854192	0.914652	1.46077	2.70527	0.433817	0.277665	0.984461	0.987943	0.918048	0.779373	1.32665	1.31838	2.03796	0.899485	1.47526	0.613632	22
osa-miR2091-5p	TCAACCGAGCCGAGGAGGAGG	0	0	0	0	0	0	0	0	0	0	0	0	0	0	0	0	0	0	0	0	0	0	0	0	0	0	0	0	0	0	0	0	0	0	0	0	0	0	0	0.0663327	0	0	0	0	0	21
osa-miR2092-3p	ACCAGCATTCCATTGGCAGAGG	0	0	0	0	0	0	0	0	0	0	0	0	0.0698962	0	0	0	0	0	0	0	0	0	0	0	0	0	0	0	0	0	0	0	0	0	0	0	0	0	0	0	0	0	0	0	0	22
osa-miR2096-5p	TGCCGATTTCCCCCTCGGGCG	0	0.068501	0	0	0.0954899	0	0	0	0	0	0	0	0	0	0	0	0	0	0	0	0	0	0	0	0	0	0	0	0	0	0	0.0663988	0	0	0	0	0	0	0	0	0	0	0	0	0	21
osa-miR2098-3p	CGGTTTGTCAAGCGGAGTGC	0	0	0	0	0	0	0	0	0	0	0	0	0	0	0	0	0	0	0	0	0	0	0	0	0	0	0	0	0	0	0	0	0	0	0	0	0.0987943	0	0	0	0	0	0	0	0	20
osa-miR2098-5p	TCCCGTGGAGGCAGCCGATG	0	0	0	0.0717612	0	0	0	0	0	0	0	0	0	0	0	0	0	0	0	0	0	0	0	0	0	0	0	0	0	0	0	0	0	0	0	0	0	0	0	0	0	0	0	0	0	20
osa-miR2103	TTTCCCTCTCCGTGCGCGCTCG	0	0	0	0	0.0954899	0	0	0.0650675	0	0	0	0	0.0698962	0	0	0	0.130563	0	0	0	0	0	0	0	0	0	0	0	0	0	0.457326	0.663988	1.00661	0.50612	0.694163	0.49223	0.790354	0.979251	0.584529	0.596994	1.24899	0.655058	0.149914	0.409795	0.788955	22
osa-miR2106	CCGAGGTTTTCTGGATACATT	0	0.068501	0	0.932895	0	0.0744168	0	0	0	0	0	0	0	0	0	0	0	0	0	0	0	0	0	0	0.110716	0	0	0	0	0	0	0	0	0	0	0	0	0.0612032	0	0.0663327	0	0	0	0	0	21
osa-miR2118a	TTCTCGATGCCTCCCATTCCTA	0	0	0	0	0	0	0	0	0	0	0	0	0	0	0	0	0	0	0	0	0	0	0	0	0	0	0	0	0	0	0	0	0.125827	0	0	0	0.0987943	0	0	0	0	0.0727842	0	0	0	22
osa-miR2118b>osa-miR2118n	TTCCCGATGCCTCCCATTCCTA	0.204982	0	0	0	0	0.0744168	0	0.78081	0	0	0	0.149045	0.349481	0.44403	0.299857	1.02941	0.652816	0.663706	0.155131	0.073826	0	0	0.214275	0.27863	0.221432	0.343001	0.31405	0.161032	0.423179	0	2.56103	20.7828	9.18535	3.90436	1.94366	0.773505	1.48191	1.04045	0.649477	11.2766	0.971438	8.15183	1.34923	1.06547	0.613632	22
osa-miR2118c>osa-miR2118q	TTCCCGATGCCTCCTATTCCTA	0	0	0	0	0	0	0	0.130135	0.0731891	0	0	0	0.0698962	0	0	0.0935831	0.0652816	0	0	0	0	0.226793	0	0	0	0	0	0	0.0846357	0.170838	0	0.398393	0.0629134	0.0723029	0	0	0	0	0	0	0.0693884	0	0	0	0	22
osa-miR2118e>osa-miR2118r	TTCCCAATGCCTCCCATGCCTA	0	0	0	0	0.0954899	0	0	0.130135	0	0	0.0647778	0	0.0698962	0.0740049	0.0749644	0.0935831	0.195845	0.165927	0	0.073826	0	0	0	0	0	0	0	0	0	0	0	0.0663988	0.125827	0	0.0694163	0	0	0.0612032	0.0649477	0	0	0	0	0	0	22
osa-miR2118f>osa-miR2118j>osa-miR2118m	TTCCTGATGCCTCCCATTCCTA	0	0	0	0	0	0	0.0733744	0	0	0	0.194333	0	0.0698962	0.0740049	0	0	0	0	0	0	0	0	0.107138	0	0	0	0	0	0	0	0	0.0663988	0	0	0	0.0703186	0	0	0	0.132665	0	0.0727842	0	0	0	22
osa-miR2118g	TTCCTAATGCCTCCCATTCCTA	0	0	0	0	0	0	0	0	0	0	0	0	0	0	0	0	0	0	0	0	0	0	0	0	0	0	0	0	0	0	0	0	0	0	0	0	0	0	0	0	0.0693884	0	0	0	0	22
osa-miR2118h>osa-miR2118k	TTCCTGATGCCTCTCATTCCTA	0	0	0	0	0	0	0	0	0	0	0	0	0	0	0	0	0	0	0	0	0	0	0	0	0	0	0	0	0	0	0	0	0	0	0	0	0	0	0	0	0	0	0.0749571	0	0	22
osa-miR2118o	CTCCTGATGCCTCCCAAGCCTA	0.307473	0.068501	0.248481	0	0.28647	0.372084	0.293498	0.976013	0.292756	0.300142	0.0647778	0.29809	0.489274	1.25808	0.524751	0.561499	0.848661	0.414816	0.310261	0.073826	0.38429	1.13397	0.214275	0.27863	0.110716	0.0686003	0	0.0805161	0	0.170838	1.09758	2.05836	1.25827	0.216909	0.347082	0.0703186	0.395177	0.306016	0.259791	2.18898	0.208165	0.946195	0.224871	0.491754	0.262985	22
osa-miR2118p	TTCCCGATGCCTCCCATGCCTA	0	0	0	0	0	0	0	0	0	0	0	0	0	0	0	0	0	0	0	0	0.192145	0	0	0.139315	0	0	0	0	0	0	0	0.265595	0.37748	0	0	0	0	0.122406	0	0	0	0	0.0749571	0	0	22
osa-miR2120	AAAGATCTTTAGTCCCGGTTGTTC	0.102491	0.205503	0.248481	0.0717612	0.572939	0.0744168	0.146749	0.78081	0.365945	0.200095	0.129556	0.149045	0.139792	0.29602	0.149929	0.280749	0.0652816	0	0.232696	0.295304	0	0.453586	0.107138	0	0	0.274401	0.25124	0	0.423179	0	0	0.0663988	0.0629134	0	0.138833	0	0.197589	0.0612032	0.454634	0.132665	0	0.0727842	0.0749571	0	0.175323	24
osa-miR2120b-3p	TTTAGTCGCGGTTGGTGTTA	0	0	0	0	0	0	0	0	0	0	0	0	0	0	0	0	0	0	0	0	0	0	0	0	0.110716	0	0	0	0	0	0	0	0	0	0	0	0	0	0	0	0	0	0	0.081959	0	20
osa-miR2120b-5p	ACACCAACCGCGACTAAAGA	0	0	0	0	0	0	0	0	0	0	0	0	0	0	0	0	0	0	0	0	0	0	0	0	0	0	0	0	0	0	0	0	0	0	0	0	0	0	0	0.0663327	0	0	0	0	0	20
osa-miR2121a>osa-miR2121b	AAAACGGAGCGGTCCATTAGCGCG	0.204982	0.890513	0.579789	0.215284	0.763919	0.520918	0.366872	0.26027	0.219567	0.600284	0.323889	0.819747	0.279585	0.29602	0.299857	1.31016	0.456971	0.746669	0.0775653	0.147652	0	0.226793	0.42855	0.139315	0.332148	0.754603	0.06281	0.0805161	0.0846357	0	0.274396	0.796786	0.692047	0.216909	0.347082	0.210956	0.889148	0.734438	0.129895	0.928658	0.41633	0.363921	0.524699	0.245877	0.52597	24
osa-miR2275c	AGAATTGGAGGAAAACAAACTGA	0	0	0.165654	0	0.0954899	0	0.0733744	0	0.0731891	0.100047	0.0647778	0.0745225	0.0698962	0.14801	0.149929	0.187166	0	0	0.0775653	0.221478	0	0	0	0.139315	0.110716	0	0	0	0	0	0.0914652	0.0663988	0.0629134	0	0	0	0	0	0	0	0	0	0	0	0	23
osa-miR2275d	CTTGTTTTTCTCCAATATCTCA	0.102491	0.342505	0.0828269	0.215284	0	0	0.0733744	0	0.146378	0	0.194333	0.0745225	0	0	0.0749644	0	0.195845	0.24889	0	0	0	0	0	0	0.110716	0.137201	0.06281	0.0805161	0	0	0	0.199197	0.0629134	0	0.208249	0	0.0987943	0.122406	0	0.0663327	0	0.291137	0.149914	0	0.0876617	22
osa-miR2863a	TTGTCCCATTCTAGTTTAGCT	9.32669	11.6452	8.69683	1.57875	11.1723	8.70677	6.67707	6.57182	6.95296	10.0047	7.19033	8.79365	9.2263	6.73445	12.1442	0.935831	0.522253	2.07408	0.465392	0.959738	1.34502	0.907173	0.642826	1.67178	2.43575	1.57781	1.82149	1.04671	1.01563	1.28129	1.00612	1.46077	0.880787	0.578423	0.555331	0.773505	0.69156	1.28527	0.974216	0.862325	0.624496	1.3829	1.94888	1.47526	1.84089	21
osa-miR2863b	TTCGTTTATTTGGACTAGAGT	2.15231	4.65807	3.0646	1.65051	2.76921	1.786	2.27461	2.66777	0.80508	2.60123	2.26722	1.19236	4.33357	1.5541	5.02261	1.77808	1.95845	4.56298	0.698088	0.442956	1.92145	0.907173	0.321413	0.696575	2.1036	1.2348	0.6281	0.0805161	0.846357	0.341677	1.37198	2.39036	1.76157	1.37376	1.73541	1.26574	1.28433	0.856845	1.10411	1.65832	1.24899	1.52847	1.79897	1.06547	1.22726	21
osa-miR2863c	TTAGTAGGACTAGAATGGGCCAAA	2.86975	4.38406	4.63831	0.645851	3.53313	2.75342	2.20123	3.77392	2.56162	5.60265	3.23889	4.62039	5.03253	5.03234	4.64779	5.5214	3.06824	3.98224	6.90331	5.31547	8.45438	11.5665	6.74967	7.52302	9.41085	6.99723	4.08265	3.86477	3.80861	3.92928	3.933	5.37831	3.52315	3.75975	3.05432	4.85198	4.24815	7.09957	5.91024	6.30161	6.38373	5.09489	6.07152	6.96651	7.27592	24
osa-miR2864.1	TTTTGCTGCCCTTGTTTTGCA	0.819929	2.19203	1.32523	0.215284	1.52784	1.63717	0.880493	1.10615	0.878269	1.7008	0.777333	0.447135	1.04844	1.33209	1.49929	0.374332	0.39169	0.24889	0.310261	0.295304	0.576435	0	0.107138	0.696575	0.885727	1.2348	0.18843	0.322064	0.338543	0.256258	0.914652	0.398393	0.18874	0.578423	0.485914	0.562549	0.889148	0.979251	0.324739	0.530662	0.41633	0.363921	0.824528	0.327836	0.613632	21
osa-miR2864.2	TTGTTTTGCATTGTATAGGTA	0.307473	0.205503	0.331308	0.0717612	0.47745	0.372084	0.66037	0.0650675	0.292756	0.200095	0.323889	0	0.349481	0.370025	0.974537	0.0935831	0	0.165927	0.155131	0	0	0	0.107138	0	0	0	0.18843	0	0	0.0854192	0.731722	0.59759	0.314567	0.433817	0.416498	0.49223	0.197589	0.244813	0.519582	0.132665	0.277554	0.436705	0.599657	0.737631	0.262985	21
osa-miR2865	CTCAGCAGTCGACTGTACCGTG	0	0	0	0	0	0	0	0	0	0	0	0	0	0	0	0	0	0	0	0	0	0	0	0	0	0	0	0	0	0	2.01223	3.91753	2.64236	1.37376	1.94366	1.33605	1.38312	1.8361	1.23401	1.98998	1.94288	2.83858	2.54854	2.62269	2.19154	22
osa-miR2866	TCTAGTTTGTGTTCAGCATC	0	0	0	0	0	0	0	0	0	0	0	0	0.0698962	0	0	0	0	0	0	0	0	0	0	0	0.110716	0	0	0	0	0	0	0	0	0	0	0	0	0	0	0	0	0	0	0	0.0876617	20
osa-miR2867-3p	CCAGGACGTGTGGGATGGCA	3.07473	3.56205	4.14135	0.287045	4.20156	2.08367	1.76099	2.73284	1.39059	4.60218	1.81378	3.27899	3.91419	4.73632	4.04808	2.80749	3.06824	2.98668	0.620522	0.812086	2.88218	1.81435	0.857101	0.696575	4.31792	2.19521	0.87934	1.04671	1.52344	0.597935	1.8293	2.39036	1.32118	0.723029	1.80482	0.984461	0.790354	1.53008	1.88348	1.85732	0.971438	1.01898	1.27427	1.14743	0.788955	20
osa-miR2867-5p	TGTGCCATCCCACACATCCCGA	0.204982	0.068501	0	0	0.0954899	0.297667	0.146749	0	0	0	0.0647778	0.223567	0	0.0740049	0	0	0.195845	0.0829633	0.0775653	0.073826	0	0.226793	0.107138	0	0	0.0686003	0.06281	0	0	0	0	0	0	0.0723029	0.0694163	0.140637	0	0	0.0649477	0.132665	0.0693884	0.0727842	0	0	0	22
osa-miR2868	TTGGTTTTGTGTAGTAGAAA	0	0	0	0	0	0	0	0	0	0	0	0	0	0	0	0	0	0	0	0	0	0	0	0	0	0	0	0	0	0	0	0	0	0	0	0	0	0	0	0	0.0693884	0	0	0	0	20
osa-miR2869	TCCCGACATTAAATTCTGGGC	1.02491	1.23302	1.32523	0.0717612	0.572939	0.520918	0.146749	0.0650675	0.219567	0.700331	0.388667	0.745225	0.279585	0.14801	0.674679	0.280749	0.261127	0.414816	0.310261	0.221478	0.38429	0.226793	0	0.417945	0.885727	0.205801	0.12562	0.0805161	0.169271	0.170838	0.365861	0.199197	0	0	0.138833	0	0.493971	0.122406	0.0649477	0.0663327	0.138777	0.363921	0	0.081959	0.438308	21
osa-miR2870	TAATCAGTTTGGGGAGACAAA	0.614947	0.68501	0.993923	0.430567	0.763919	0.520918	0.807119	0.976013	0.365945	0.800379	0.777333	1.11784	0.698962	0.518035	0.599715	0.748665	1.17507	1.49334	0.0775653	0.959738	0.38429	0.907173	0.214275	0.27863	1.10716	0.891804	0.75372	0.322064	0.253907	0.256258	0.731722	0.863185	1.06953	0.578423	0.485914	0.914142	0.889148	0.673235	1.16906	1.26032	1.87349	1.89239	0.674614	0.81959	0.52597	21
osa-miR2871a-3p>osa-miR2871b-3p	TATTTTAGTTTCTATGGTCAC	6.8669	7.39811	10.4362	0.861134	5.44292	2.53017	1.98111	6.44168	3.14713	6.60313	5.11744	5.9618	10.135	5.77239	16.6421	6.73798	6.52816	10.2045	2.32696	1.698	2.49789	4.98945	2.67844	2.7863	2.54646	2.67541	1.44463	0.644129	0.169271	1.70838	2.28663	2.72235	3.14567	0.361515	1.52716	0.773505	2.86503	0.856845	0.779373	1.92365	2.01226	1.89239	1.0494	0.327836	1.49025	21
osa-miR2871a-5p	GACCGTAGAAACTAGCATAGAAAA	7.07189	7.67211	10.7675	1.21994	10.8858	4.24176	4.47584	5.72594	2.48843	8.70412	5.31178	8.34652	9.64568	8.36256	10.3451	5.98932	4.9614	9.20892	1.70644	1.18122	4.61148	3.4019	1.7142	2.36836	5.42508	4.18462	1.69587	1.61032	2.03126	2.56258	7.77454	8.56545	5.59929	4.04896	2.9849	4.00816	2.56865	3.18257	2.53296	7.03127	5.27352	4.80376	3.6729	4.50774	4.03244	24
osa-miR2871b-5p	CATGGTGACCGTAGAAACTAACAT	1.43488	0.616509	0.828269	0.143522	0.28647	0.148834	0.0733744	0.195203	0.146378	0.800379	0.518222	0.521657	0.55917	0.14801	0.824608	0.655082	0.456971	0.663706	0.387827	0.147652	0.960725	0.226793	0.107138	0.139315	0.221432	0.686003	0.6281	0.241548	0	0.341677	0.0914652	0.265595	0.125827	0.216909	0.416498	0.0703186	0.296383	0.367219	0.389686	0.265331	0.346942	0.145568	0.224871	0.409795	0.350647	24
osa-miR2872	TGGGGTTCTACAAACCGAACT	0.204982	0	0.0828269	0	0	0.0744168	0.0733744	0.195203	0	0.400189	0	0	0	0.0740049	0	0	0.0652816	0	0	0	0	0.226793	0	0	0	0	0	0	0	0	0	0	0	0	0	0	0	0	0	0	0	0	0	0	0	21
osa-miR2873a	AAGTTTGGACTTAAATTTGGTAAC	50.8356	81.2422	77.1119	22.0307	60.9226	85.8026	78.7308	24.9209	54.5991	76.8364	62.7049	74.1499	34.7384	19.9073	41.98	47.6338	46.0888	63.8817	10.704	16.3155	18.2538	14.288	12.6422	20.34	20.8146	27.7145	22.5488	14.4929	9.56384	15.5463	32.4701	38.1793	44.1023	18.0034	10.4819	18.5641	28.7491	16.0352	19.4843	26.8648	35.4575	42.2148	22.5621	19.4243	16.831	24
osa-miR2873b	TTGGACTTGAGATTTGGTATG	1.1274	0.959014	0.828269	0.430567	0.47745	0.372084	0.293498	0.325338	0.146378	0.700331	0.518222	0.670702	0.55917	0.59204	0.599715	0.748665	0.718098	1.07852	0.387827	0.221478	1.15287	1.36076	0.535688	0.27863	0.664295	0.274401	0.31405	0.322064	0	0.170838	0.365861	0.331994	0.251653	0.216909	0.0694163	0.0703186	0.395177	0.550829	0.779373	0.464329	0.693884	0.582274	0.224871	0.491754	0.52597	21
osa-miR2873c	CAAATGAAGTTGAGTTTGGAC	0.102491	0.411006	0	0	0.572939	0.0744168	0.146749	0	0.0731891	0.500237	0.0647778	0.149045	0	0	0.149929	0	0	0.49778	0.155131	0	0.192145	0	0.214275	0	0	0.137201	0	0	0	0.0854192	0.0914652	0.132798	0	0	0	0.0703186	0	0.0612032	0.0649477	0.132665	0.346942	0.0727842	0	0	0	21
osa-miR2874	ATGTGAACAGTGTCAAACAGTGTC	0.409964	0.616509	0.165654	0.502328	0.763919	0.297667	0.513621	0.78081	0.439135	0.800379	0.583	0.968792	0.978547	0.814054	0.449786	0.280749	0.456971	0.746669	0.0775653	0.147652	0.38429	0.453586	0	0.27863	0.442863	0.0686003	0.31405	0.161032	0.169271	0.170838	0.0914652	0.531191	0.251653	0.144606	0.416498	0.421912	0	0.18361	0.0649477	0.530662	0.138777	0.218353	0.224871	0.409795	0.0876617	24
osa-miR2875	ATTTACAGTCATATACAGTTTATA	0	0	0	0.0717612	0	0	0	0	0	0	0	0	0	0	0	0	0	0	0	0	0	0	0	0	0	0	0	0	0	0	0	0	0	0	0	0	0	0	0	0	0	0	0	0.081959	0	24
osa-miR2876-3p	TTCCTATATGAACACTGTTGC	7.27687	7.74061	8.44835	2.15284	5.15645	3.27434	3.4486	5.0102	2.41524	6.10289	5.83	5.66371	8.52734	4.29229	8.8458	5.89574	6.00591	8.46225	2.24939	3.83895	5.57221	10.2057	4.92833	7.10507	4.65007	5.96822	2.82645	2.0129	1.52344	3.07509	2.56103	4.97991	5.09598	1.87988	1.66599	2.10956	5.92766	3.36618	2.33812	4.31163	4.64902	5.45881	3.44803	2.95052	4.90905	21
osa-miR2876-5p	AATTGCTGGCAGCACTGTTTA	1.1274	1.50702	2.48481	0	1.05039	0.893002	1.46749	0.910945	0.365945	2.20104	0.777333	1.3414	1.53772	1.11007	1.57425	1.59091	1.17507	3.81631	0.310261	0.36913	0.576435	0.226793	0.749963	0.139315	0.885727	1.71501	0.25124	0.0805161	0.169271	0.341677	0.18293	0.863185	0.880787	0.216909	0.0694163	0.210956	0.0987943	0.428422	0.194843	1.12766	0.346942	0.727842	0.149914	0.491754	0.350647	21
osa-miR2877	TTGCATCCTCTGCACTTTGGGCCT	8.50676	16.5772	11.5958	2.36812	13.5596	17.1159	19.004	6.11635	21.0053	19.5092	13.9272	19.7485	7.26921	7.32649	10.495	2.33958	3.39464	2.07408	0.775653	1.18122	2.1136	2.72152	1.07138	1.53247	2.98933	3.63581	2.76364	2.25445	3.04689	2.648	4.66473	6.63988	5.03307	3.18133	4.85914	6.18804	4.05056	7.28318	4.2216	7.2966	5.82863	5.24046	6.67118	6.88455	5.2597	24
osa-miR2878-3p	CAGGATTTTATACATGTAAAGAAT	0.307473	0.137002	0.414135	0.0717612	0.0954899	0.372084	0.220123	0.455473	0.439135	0.500237	0	0.0745225	0.419377	0.14801	0.449786	0.467916	0.718098	0.663706	0.232696	0.147652	0.576435	0	0.42855	0.55726	0.553579	0.205801	0.06281	0.161032	0	0.0854192	0.457326	0.796786	0.503307	0.0723029	0.208249	0.562549	0.395177	0.489626	0.324739	0.397996	0.555107	1.01898	0.374785	0.245877	0.0876617	24
osa-miR2878-5p	TACATGTATAAAATTCTGAGGATG	6.45694	15.8237	12.0099	6.60203	13.2731	21.8041	24.5071	19.9757	21.298	8.30393	16.324	17.0656	20.6194	14.283	21.8146	32.099	25.0029	27.4608	17.2971	23.4028	15.3716	18.597	16.0706	18.3896	18.1574	21.5405	23.3653	13.0436	9.81774	15.1192	30.1835	30.2115	31.0163	18.6542	14.7857	20.8143	19.6601	16.0352	14.4833	26.6658	33.584	38.794	28.2588	19.8341	16.831	24
osa-miR2879	GCCAGATGTGTTAAAATAATGACC	1.33238	4.45257	3.89287	1.36346	5.06097	9.82302	7.99781	6.50675	5.26962	4.40208	3.75711	6.25989	5.38201	6.43843	3.89815	2.80749	3.26408	3.40149	1.16348	2.95304	3.8429	1.58755	1.7142	1.53247	1.99289	3.01841	2.76364	1.85187	1.60808	2.39174	3.84154	4.18313	4.59268	2.89212	2.77665	4.50039	2.86503	1.40767	2.01338	5.30662	3.74697	3.78478	4.34751	3.11444	3.50647	24
osa-miR2880	ACGGTATCCCGTTCGGACAGGATG	1.94733	2.53454	2.31915	0.430567	1.33686	2.2325	1.61424	1.04108	0.878269	2.60123	1.61944	2.16115	1.95709	1.11007	1.19943	2.24599	1.50148	2.24001	0.232696	1.10739	0.76858	0.453586	1.07138	0.139315	2.43575	1.37201	0.81653	0.966193	0.846357	1.53755	1.46344	2.12476	2.20197	1.01224	0.624747	1.8986	1.6795	0.918048	0.779373	1.98998	1.66532	2.03796	1.49914	1.31134	0.964278	24
osa-miR2905	TACATGTCAGTGACAAAGGCA	0.102491	0.068501	0	0	0.0954899	0.0744168	0.146749	0.130135	0	0	0.0647778	0.0745225	0	0	0.224893	0.0935831	0	0.165927	0	0	0	0	0	0.139315	0	0	0	0	0	0	0.0914652	0.0663988	0	0	0	0	0	0	0	0	0	0.0727842	0	0.081959	0	21
osa-miR2924	CTCGCTTGCTCCGGCCGCCAC	0	0.137002	0	0	0	0	0	0	0	0	0	0	0	0	0	0	0	0	0	0	0	0	0	0	0	0	0	0	0	0.0854192	0	0	0	0	0	0	0	0	0	0	0	0	0	0	0	21
osa-miR2925	TGGCGGCCGCGGGCTTCGT	0	0	0	0	0	0	0	0	0	0	0	0	0	0	0	0	0	0	0	0	0	0	0	0	0	0	0	0	0	0	0	0	0	0	0.0694163	0	0	0	0	0	0	0	0	0	0	19
osa-miR319a-3p	ACTGGATGACGCGGGAGCTAA	0	0	0	0	0	0	0.146749	0	0	0.100047	0	0	0.139792	0	0	0	0	0	0.0775653	0	0	0	0	0	0	0	0	0	0	0	0	0	0	0	0	0	0	0	0	0	0	0	0	0	0	21
osa-miR319a-3p.2-3p>osa-miR319b	TTGGACTGAAGGGTGCTCCC	4.50961	9.79564	6.54333	1.07642	4.39254	3.42317	2.34798	4.22939	2.48843	6.30298	3.43322	7.00511	6.22077	6.29042	4.87268	2.24599	3.00296	4.14816	2.32696	1.47652	4.41934	4.30907	2.67844	2.08973	7.52868	4.87062	1.69587	0.563613	1.43881	2.648	1.8293	0.995983	1.50992	0.289212	0.694163	0.984461	0.592766	1.34647	0.909268	1.32665	0.763272	0.87341	0.824528	0.655672	1.75323	20
osa-miR390-3p	CGCTATCTATCCTGAGCTCC	0	0.205503	0.579789	0.0717612	0.19098	0	0	1.95203	0	0.100047	0	0.0745225	1.39792	0.740049	0.824608	0.0935831	0.195845	0.165927	0.155131	0.147652	0.192145	0	0.42855	0.417945	0.442863	0.0686003	0	0	0.507814	0	0.0914652	0.995983	0.37748	0.216909	0.971828	0	0.493971	0	0.84432	1.26032	0	0	0.374785	0.163918	0.52597	20
osa-miR390-5p	AAGCTCAGGAGGGATAGCGCC	5.84199	20.2763	16.4826	2.08107	8.88056	4.16734	4.76934	12.2978	5.78194	9.5045	5.63567	15.1281	11.8824	15.245	10.0452	2.62033	3.45993	4.48002	1.31861	1.84565	2.69003	5.89662	2.35703	1.39315	5.42508	5.62522	1.50744	0.966193	2.28516	1.53755	1.00612	2.39036	2.89401	0.939938	1.94366	1.40637	1.87709	1.40767	2.14327	4.0463	2.15104	0.800626	2.54854	1.06547	2.9805	21
osa-miR393a	TCCAAAGGGATCGCATTGATC	14.5537	32.6065	3.97569	1.36346	61.591	3.34876	18.1235	1.49655	20.7125	32.9156	23.903	35.7708	17.9633	4.36629	15.5926	22.6471	7.31154	13.0252	2.55966	0.073826	2.30574	3.85548	5.24974	8.63754	8.63584	13.1713	2.07273	2.89858	2.03126	0.683354	1.55491	0.929584	1.50992	0.795332	5.69214	2.39083	3.35901	3.67219	4.80613	2.05631	3.95514	0.87341	5.54682	3.03248	1.49025	21
osa-miR393b-3p	TCAGTGCAATCCCTTTGGAAT	93.8819	111.04	121.424	31.3596	140.084	82.3794	95.7536	44.5712	68.7978	121.658	103.515	110.74	55.9869	44.773	65.5938	33.0348	27.2877	37.9142	9.15271	15.282	15.7559	20.6382	16.4992	18.9469	41.1863	53.5768	14.3835	13.1241	15.0652	12.9837	7.31722	17.1309	10.192	7.23029	6.03922	7.03186	11.1638	12.9139	10.3916	21.5581	11.5185	11.9366	10.8688	9.09744	13.4122	21
osa-miR393b-5p	TCCAAAGGGATCGCATTGATCT	25.5203	8.83663	41.8276	10.3336	4.29705	20.8367	4.18234	14.5101	4.24497	19.7093	9.00411	1.93758	5.5218	8.43656	6.14708	0	7.24626	3.40149	0.0775653	5.53695	8.64653	4.53586	5.03547	0.696575	8.30369	15.2293	5.40166	2.25445	3.89324	4.27096	0.823187	6.30789	4.08937	2.386	1.59658	0.632868	3.65539	2.75414	0.649477	9.55191	3.81636	5.82274	0.524699	1.88506	3.4188	22
osa-miR394	TTGGCATTCTGTCCACCTCC	54.1153	78.1596	68.7464	17.2944	59.8722	36.0922	29.4965	57.1943	22.3227	61.7292	36.7938	49.781	65.2132	41.4428	77.1383	32.5669	31.5963	47.6209	6.12766	5.02017	19.5988	23.1329	10.6066	11.5632	25.0218	27.2343	9.92399	7.08542	6.94013	11.4462	21.5858	41.6985	41.9003	14.4606	22.2132	17.8609	23.9082	23.4408	27.0832	39.2026	25.5349	29.1865	19.8636	21.4732	23.4057	20
osa-miR395a	GTGAAGTGCTTGGGGGAACTC	0	0	0	0.0717612	0	0	0	0	0	0	0	0.0745225	0	0	0	0	0	0.165927	0	0.073826	0	0	0.107138	0	0	0.0686003	0	0	0	0	0.18293	0.59759	1.63575	0.144606	0.138833	0	0.296383	0.306016	0.649477	0.198998	0	0.291137	0.0749571	0.081959	0.0876617	21
osa-miR395b>osa-miR395d>osa-miR395e>osa-miR395g>osa-miR395h>osa-miR395i>osa-miR395j>osa-miR395k>osa-miR395l>osa-miR395s>osa-miR395m>osa-miR395n>osa-miR395p>osa-miR395q>osa-miR395r>osa-miR395y	GTGAAGTGTTTGGGGGAACTC	0.819929	1.16452	1.2424	0.143522	0.668429	1.04184	0.880493	1.69176	1.02465	1.30062	0.712556	1.11784	0.349481	0.888059	0.449786	4.67916	3.06824	4.14816	0.930784	0.590608	2.88218	1.13397	0.535688	1.11452	2.43575	2.81261	0.87934	0.885677	0.846357	0.939612	19.2077	31.7386	89.9661	13.7376	67.4727	7.73505	8.49631	11.9346	32.0842	18.3742	4.64902	75.8411	14.3168	18.1129	23.4057	21
osa-miR395c	GTGAAGTGTTTGGAGGAACTC	0	0	0	0	0	0	0	0	0	0	0	0	0	0	0	0.0935831	0.0652816	0	0.0775653	0	0	0	0	0	0	0	0	0	0	0	0.0914652	0.199197	0	0.0723029	0	0	0	0	0.0649477	0	0	0	0	0	0	21
osa-miR395f	GTGAATTGTTTGGGGGAACTC	0	0	0	0	0	0	0	0	0	0	0	0	0	0	0	0	0	0	0	0	0	0	0	0	0	0	0	0	0	0	0	0.132798	0.18874	0	0	0	0	0	0.0649477	0.198998	0	0.0727842	0	0	0	21
osa-miR395o	ATGAAGTGTTTGGAGGAACTC	0	0	0	0	0	0	0	0	0	0	0	0	0	0	0	0	0	0	0	0	0	0	0	0	0	0	0	0.161032	0	0	0	0	0.37748	0	0.138833	0	0	0	0	0	0.0693884	0.0727842	0	0	0	21
osa-miR395t	GTGAAGTGTTTGGGGAAACTC	0	0	0	0	0	0	0	0	0	0	0	0	0	0	0	0	0	0	0	0	0	0	0	0	0	0	0	0	0	0	0	0.0663988	0.125827	0.0723029	0	0	0.0987943	0	0.129895	0.0663327	0	0	0	0	0	21
osa-miR395u	GTGAAGCGTTTGGGGGAAATC	0	0	0	0	0	0	0	0	0	0	0	0	0	0	0	0	0	0	0	0	0	0	0	0	0	0	0	0	0	0	0	0	0	0	0	0	0	0	0	0	0	0.0727842	0	0	0	21
osa-miR395w	GTGAAGTGTTTGGGGGATTCTC	0	0	0	0	0	0	0	0	0	0	0	0	0	0.0740049	0	0.561499	0.0652816	0.49778	0	0	0	0	0	0	0.110716	0	0	0	0	0	0	0.464792	1.25827	0	0.347082	0	0.197589	0.306016	0.389686	0	0	1.67404	0.299828	0.163918	0	22
osa-miR396a-3p>osa-miR396b-3p	GTTCAATAAAGCTGTGGGAA	0.717438	0.068501	2.40198	0	0	0	0	0.0650675	0.0731891	0.100047	0	0	0	0	0	0	0.130563	0.24889	0	0.073826	0	0	0	0	0.221432	0.137201	0	0	0	0	0	0.0663988	0	0	0	0.210956	0	0	0	0.0663327	0	0.0727842	0	0.081959	0	20
osa-miR396a-5p>osa-miR396b-5p	TTCCACAGCTTTCTTGAACTG	100.646	17.6048	4.14135	4.01863	71.4265	56.9289	4.91609	81.3344	1.82973	89.4423	60.3729	9.53888	125.184	3.55224	8.02119	4.30482	214.385	3.73335	0.775653	2.51008	91.0767	70.3059	5.57115	46.9492	114.702	134.182	0.43967	20.5316	27.1681	1.96464	96.8617	24.0364	4.65559	52.7088	28.9466	44.582	6.52042	3.61099	5.32571	113.164	113.936	126.572	7.72058	1.22938	70.48	21
osa-miR396c-3p	GGTCAAGAAAGCTGTGGGAAG	1.33238	1.50702	1.15958	0.215284	2.10078	0.669751	1.10062	1.04108	0.439135	1.80085	0.777333	1.63949	1.46782	1.62811	2.02404	1.77808	1.82789	2.15704	0.232696	0.590608	2.1136	1.36076	0.321413	0.55726	1.43931	2.19521	0.31405	0.483097	0.677086	0.597935	0.548791	0.730387	1.38409	0.144606	0.416498	0.49223	0.69156	0.734438	0.779373	1.92365	1.45716	0.655058	0.749571	0.573713	0.788955	21
osa-miR396c-5p	TTCCACAGCTTTCTTGAACTT	165.113	353.191	327.581	73.6987	154.121	162.452	258.718	154.405	138.693	163.177	116.794	230.051	199.903	206.326	455.933	329.132	104.842	416.393	39.3256	30.1948	36.5076	52.8428	57.3186	31.7638	66.0974	54.6058	69.091	20.5316	22.2592	59.1101	57.0743	279.074	258.134	33.3316	24.3651	35.089	107.587	74.1171	91.6412	72.17	68.3476	58.6641	105.914	122.365	62.0645	21
osa-miR396e-3p	ATGGTTCAAGAAAGCCCATGGAAA	0.409964	0.479507	1.15958	0.0717612	0.0954899	0.22325	0.220123	0.52054	0.219567	0.300142	0.259111	0.670702	0.489274	0.222015	0.299857	0.187166	0.652816	0.0829633	0.310261	0.221478	1.15287	0.226793	0.535688	0.27863	0.442863	0.411602	0.50248	0	0.253907	0.170838	0.0914652	0.132798	0.314567	0	0.277665	0	0.0987943	0	0.324739	0.265331	0.138777	0.291137	0	0	0.175323	24
osa-miR396e-5p	TCCACAGGCTTTCTTGAACTG	1817.47	3139.4	5228.78	1080.08	3537.23	2190.09	1970.32	2250.56	1584.03	4215.4	2763.23	2114.8	5785.94	4433.71	6374	2260.87	1676.11	7538.21	1354.14	467.687	3825.22	3841.2	1863.23	623.853	4721.81	1263.34	560.768	335.591	365.203	549.246	1060.54	5748.74	5208.47	803.213	1871.6	1898.11	2929.94	953.73	919.855	5451.62	1514.75	1417.11	1039.43	2597.61	1007.14	21
osa-miR396f-3p	ATAGTTCAAGAAAGTCCTTGGAAA	0.819929	2.53454	1.90502	0.287045	1.14588	0.446501	0.146749	2.2123	0.292756	1.9009	0.518222	2.38472	2.44637	1.11007	1.72418	0.842248	0.979225	1.82519	0.232696	1.03356	1.34502	1.13397	0.642826	1.39315	2.21432	1.37201	0.50248	0.322064	0.169271	0.597935	0.18293	0	0.0629134	0.0723029	0	0.0703186	0.197589	0	0.0649477	0	0.138777	0.145568	0	0	0.262985	24
osa-miR396f-5p	TCTCCACAGGCTTTCTTGAACT	1959.83	2503.99	16.5654	4.30567	0.859409	3.94409	92.4518	2625.02	74.2869	5.80275	1.87856	1952.12	278.746	218.907	14.3932	4444.08	4151.78	511.386	90.4412	746.159	0.960725	12.2468	84.6387	1639.6	257.414	3155.75	1432.26	826.82	926.846	1177.16	1973.36	20.9156	5.28472	1189.89	5.27564	2.2502	5.03851	1676.36	2147.82	267.321	2960.87	2604.8	1804.67	6.88455	2323.21	22
osa-miR396g>osa-miR396h>osa-miR396d	TCCACAGGCTTTCTTGAACGG	240.342	69.871	88.2107	65.6615	207.309	147.122	37.7145	326.314	27.0068	130.562	138.041	201.062	85.6229	66.3824	438.617	392.207	449.725	156.635	42.0404	17.8659	61.6786	278.502	21.3204	122.458	85.9155	78.6845	30.4001	76.8123	71.0094	20.7569	41.9825	369.974	173.2	190.446	98.5018	92.1174	238.786	47.3713	62.4797	159.663	95.4784	323.453	140.994	39.7501	53.8243	21
osa-miR3979-3p	CTTCGGGGGAGGAGAGAAGC	0	0	0	0	0	0	0	0.0650675	0	0	0	0	0	0	0.0749644	0	0	0	0	0	0	0	0	0	0	0	0	0	0	0	0	0	0	0	0.0694163	0.0703186	0	0	0.0649477	0.132665	0.0693884	0	0	0	0	20
osa-miR3979-5p	TCTCTCTCTCCCTTGAAGGC	0	0	0	0	0.19098	0	0	0	0	0	0	0	0	0	0	0	0.0652816	0	0	0	0	0	0	0	0	0	0	0	0	0	0	0	0	0	0	0	0	0.0612032	0	0.132665	0	0	0	0	0	20
osa-miR397a	TCATTGAGTGCAGCGTTGATG	0.717438	0.342505	0.579789	0.0717612	0.859409	0.372084	0.146749	0.130135	0.292756	0.600284	0.259111	0.521657	0.419377	0	0.149929	1.77808	8.48661	3.81631	0.620522	1.18122	2.30574	0.680379	0.321413	0.417945	1.88217	6.24263	0.50248	0.322064	0.507814	1.28129	1.46344	11.487	2.39071	4.55508	2.08249	4.57071	7.50836	3.61099	3.63707	10.3479	6.24496	16.1581	2.32367	5.65517	3.94477	21
osa-miR397b	TTATTGAGTGCAGCGTTGATG	0.409964	0.959014	0.496962	0.143522	0.668429	0.22325	0.146749	0.130135	0.292756	0.500237	0.129556	0	0.0698962	0	0.299857	11.1364	10.9673	14.8504	1.86157	0.516782	3.26647	9.29852	0.964238	2.7863	2.32503	1.30341	0.37686	0.40258	0.846357	1.02503	2.56103	0.59759	15.98	0.795332	0.138833	0.140637	1.38312	1.8361	1.88348	2.25531	2.9837	1.89239	3.59794	4.26187	0.701293	21
osa-miR3981-3p	AGTATTAGGATACGTCTCATC	0.307473	0.68501	1.15958	0.0717612	0	0.0744168	0.146749	0.195203	0.146378	0.400189	0.323889	0.968792	0.55917	0.14801	0.224893	0.187166	0.0652816	0.414816	0.232696	0.147652	0.576435	0	0.107138	0.417945	0.553579	0.343001	0.06281	0	0	0.0854192	0.18293	0	0.251653	0.144606	0.138833	0.0703186	0.790354	0.367219	0.259791	0.132665	0.208165	0.0727842	0.449742	0.245877	0.438308	21
osa-miR3981-5p	TGGGACGTATCCTATTACTAT	0	0	0	0	0	0	0	0	0	0	0	0	0.0698962	0	0	0	0	0	0	0	0	0	0	0	0.110716	0	0	0	0	0	0	0	0	0	0	0	0	0	0	0	0	0	0	0	0	21
osa-miR3982-3p	AGTTGCCTACATGGAGCGCCA	0	0	0	0	0	0	0	0	0.0731891	0	0	0	0	0	0	0	0.130563	0	0	0	0	0	0	0	0.110716	0.0686003	0	0	0	0	0.0914652	0	0	0	0	0	0	0	0	0	0	0.0727842	0	0	0	21
osa-miR3982-5p	GCGCTCCACGTAGGCAACAAT	0.307473	0.068501	0.0828269	0.0717612	0	0.0744168	0.440247	0.195203	0.0731891	0.300142	0.129556	0.223567	0	0.370025	0.299857	0.187166	0	0	0	0	0	0	0.107138	0	0.332148	0.205801	0.06281	0	0	0	0.0914652	0.265595	0.251653	0	0.208249	0.140637	0	0	0.194843	0.132665	0.208165	0	0	0.245877	0.175323	21
osa-miR398a	TGTGTTCTCAGGTCACCCCTT	0.102491	0.137002	0.0828269	0	0	0	0	0.0650675	0	0.300142	0	0.149045	0	0	0	0.561499	92.6999	83.8759	3.18018	0.147652	15.5637	0.907173	0.214275	1.95041	0.110716	1.30341	0.75372	0.644129	3.13152	0.170838	9.51238	10.6902	4.46685	12.2192	21.4496	5.06294	2.66745	4.52904	3.83192	16.9148	26.8533	13.0284	3.82281	4.91754	10.0811	21
osa-miR398b	TGTGTTCTCAGGTCGCCCCTG	108.026	168.855	154.969	60.7817	245.218	154.34	108.741	65.8483	165.481	160.576	109.993	147.331	51.6533	29.676	52.7	44.9199	88.5872	104.202	412.88	64.3024	195.988	860	52.176	73.5584	86.0262	81.7715	30.7769	59.9845	62.1226	64.8332	40.0618	38.1129	52.3439	102.815	87.1175	94.2973	155.799	174.123	175.359	63.1488	79.5885	117.11	204.333	246.287	139.47	21
osa-miR399a>osa-miR399b>osa-miR399c	TGCCAAAGGAGAATTGCCCTG	0	0	0	0	0	0	0	0.130135	0	0	0.0647778	0	0.139792	0	0.0749644	3.64974	0.456971	1.24445	0.310261	1.18122	0.960725	0.680379	0.857101	1.67178	2.21432	1.029	1.06777	0.966193	0	0.597935	0	0.663988	0.440394	0	0.208249	0.0703186	0.296383	0.244813	0.129895	0.132665	0.277554	0.436705	0.0749571	0.245877	0.0876617	21
osa-miR399d	TGCCAAAGGAGAGTTGCCCTG	0.92242	0.890513	0.745442	0.0717612	0.668429	0.967419	0.880493	0.976013	0.878269	1.40066	0.259111	0.29809	0.698962	0.222015	1.57425	66.8183	28.5934	60.895	4.65392	11.0001	10.568	15.4219	16.8206	20.8973	36.0934	45.6878	14.2579	13.2046	8.97139	13.6671	9.87824	18.1269	7.0463	3.54284	1.59658	6.11772	11.3613	9.79251	12.9246	4.44429	6.38373	6.98728	7.19588	6.3928	10.2564	21
osa-miR399e>osa-miR399f>osa-miR399g	TGCCAAAGGAGATTTGCCCAG	0	0	0	0	0	0	0	0	0	0	0.0647778	0	0	0	0	0.187166	0	0.0829633	0	0.36913	0.192145	0.226793	0.214275	0.27863	0.221432	0.205801	0.06281	0	0.169271	0	0	0	0	0	0	0	0	0	0	0	0	0	0	0	0	21
osa-miR399h	TGCCAAAGGAGACTTGCCCAG	0	0	0	0	0	0	0	0	0	0	0	0	0	0	0	0	0.0652816	0	0	0	0	0	0	0	0	0	0	0	0	0	0	0	0	0	0	0	0	0	0	0	0	0	0	0	0	21
osa-miR399i	TGCCAAAGGAGAGCTGCCCTG	0	0	0	0	0	0	0.0733744	0	0.0731891	0	0	0	0	0	0	1.77808	0.261127	0.414816	0.0775653	0.147652	0	0	0.535688	0.696575	0.885727	0.480202	0.06281	0	0.0846357	0.170838	0	0	0.125827	0	0	0.0703186	0	0.0612032	0	0.0663327	0	0.0727842	0.0749571	0	0	21
osa-miR399j	TGCCAAAGGAGAGTTGCCCTA	0.614947	0.274004	0.165654	0	0.572939	0.22325	0.220123	0.455473	0.146378	0.500237	0.259111	0.372612	0.349481	0.370025	0.599715	36.8717	19.7151	15.1823	1.24104	3.91278	8.07009	10.2057	4.71405	17.8323	23.2503	16.3269	5.15042	5.15303	1.94662	5.55225	1.73784	6.70628	1.32118	0.939938	1.52716	0.984461	2.66745	2.81535	3.83192	1.85732	1.66532	3.05694	2.99828	0.737631	1.84089	21
osa-miR399k	TGCCAAAGGAAATTTGCCCCG	0	0	0	0	0	0	0	0	0.0731891	0	0	0	0	0	0	0.748665	0.195845	0	0.0775653	0	0	0	0.107138	0.27863	0.332148	0.137201	0	0	0	0	0	0	0	0	0	0	0	0	0.129895	0	0	0	0	0	0	21
osa-miR408-3p	CTGCACTGCCTCTTCCCTGGC	23.4705	56.1708	36.6095	7.53492	17.3792	14.5113	16.069	118.228	25.7626	33.0156	12.3078	45.3842	74.6492	66.9745	86.8837	750.443	1620.22	1638.44	1332.96	137.759	984.359	3536.39	160.385	171.915	338.569	322.627	94.7175	173.271	197.624	230.205	158.692	216.527	388.49	185.095	357.494	177.062	386.286	546.667	422.16	478.657	356.795	645.596	462.035	542.24	479.071	21
osa-miR408-5p	CAGGGATGAGGCAGAGCATGG	0.204982	0.890513	0.414135	0.143522	0.28647	0.148834	0.293498	0.195203	0.219567	0.300142	0.0647778	0.89427	0.629066	0.14801	0.524751	94.8933	25.5904	26.7971	20.5548	4.06043	30.5511	26.7616	3.74982	11.9811	21.811	22.7067	6.59505	2.09342	4.82424	2.648	11.2502	29.4811	90.7211	29.7888	12.0784	28.1274	26.0817	20.3807	22.2771	50.4792	84.0293	227.014	40.4019	37.1274	22.4414	21
osa-miR435	TTATCCGGTATTGGAGTTGA	1.43488	1.43852	1.82219	0.358806	2.76921	1.48834	1.46749	1.30135	0.439135	2.10099	0.842111	1.41593	1.95709	0.888059	1.57425	0.935831	1.24035	2.4889	0.387827	0.295304	0.576435	2.04114	0.535688	1.11452	0.996443	0.891804	0.56529	0.161032	0.169271	0.427096	0.823187	0.929584	1.25827	0.433817	0.902412	0.210956	0.296383	0.550829	0.454634	0.596994	1.04083	0.582274	0.974442	0.655672	0.438308	20
osa-miR439a>osa-miR439b>osa-miR439c>osa-miR439d>osa-miR439e>osa-miR439f>osa-miR439g>osa-miR439h>osa-miR439i	TGTCGAACCGCGGTTGTTCGA	0.409964	0.68501	0.828269	0	0.47745	0.0744168	0.0733744	0.0650675	0	0.400189	0.0647778	0.372612	0.209689	0.14801	0.149929	0.187166	0.195845	0	0.232696	0	0.192145	0	0.214275	0	0.110716	0.205801	0	0.161032	0	0.0854192	0	0.132798	0.251653	0	0.0694163	0	0.296383	0.428422	0.194843	0.132665	0.208165	0.291137	0.149914	0.245877	0.175323	21
osa-miR440	AGTGTCTCCTGATGATCGGGACAA	0.102491	0.137002	0	0.0717612	0	0	0.220123	0	0.0731891	0.100047	0.129556	0.372612	0.0698962	0.0740049	0.0749644	0	0	0.165927	0.155131	0	0.38429	0	0.107138	0.27863	0	0	0	0.0805161	0	0	0	0.132798	0	0	0	0.0703186	0	0	0	0	0	0	0	0.081959	0.438308	24
osa-miR443	ATCACAATACAATAAATCTGGA	0	0	0	0	0	0	0	0	0	0	0	0	0	0	0.224893	0	0	0	0	0	0	0	0	0	0	0	0	0	0	0	0	0	0	0	0	0	0	0	0	0.0663327	0	0	0.0749571	0	0	22
osa-miR444a-3p.1>osa-miR444d.1	TTGCTGCCTCAAGCTTGCTGC	0.614947	0.890513	1.65654	0.0717612	1.24137	0.893002	0.513621	1.10615	0.439135	0.400189	0.453444	1.04331	1.95709	1.11007	1.19943	5.05349	5.54894	5.55854	0.542957	0.516782	2.1136	2.04114	0.857101	0.55726	2.98933	1.50921	0.56529	0.563613	0.677086	0.170838	1.46344	2.92155	2.45362	0.939938	1.18008	0.632868	0.592766	0.306016	1.10411	1.98998	1.66532	0.655058	0.674614	0.901549	0.788955	21
osa-miR444a-3p.2>osa-miR444d.2>osa-miR444e	TGCAGTTGCTGCCTCAAGCTT	10.1466	13.9057	13.418	2.87045	7.73468	6.02776	6.23683	10.4759	4.31816	12.3058	6.54256	9.24079	11.1834	7.99253	13.0438	20.9626	18.8664	23.4786	4.0334	2.95304	12.1051	8.16455	4.71405	3.90082	9.85371	12.8283	3.07769	2.41548	1.10026	1.7938	10.9758	26.0947	24.4733	7.3749	8.53821	6.53963	11.3613	10.0373	10.9762	26.0688	20.2614	20.7435	10.7189	11.966	11.7467	21
osa-miR444a-5p	GCTAGAGGTGGCAACTGCATA	0	0	0	0	0	0	0	0	0	0	0	0	0	0	0	0	0	0	0	0	0	0	0	0	0	0	0.18843	0	0.0846357	0	3.56714	4.84712	2.95693	2.09678	1.24949	2.2502	0.987943	1.53008	2.07833	4.57696	3.67758	3.34807	2.47358	2.21289	1.84089	21
osa-miR444b.1>osa-miR444c.1	TGTTGTCTCAAGCTTGCTGCC	738.961	1097.52	890.555	166.055	854.253	526.35	556.252	1020.39	413.811	912.232	495.485	825.783	1203.54	906.265	1239.84	869.668	730.893	934.415	121.312	97.0073	382.369	505.749	301.164	321.679	385.955	407.897	156.585	167.796	192.8	192.193	517.51	843.398	757.036	252.843	319.801	347.796	286.899	308.219	371.631	865.708	523.327	507.888	304.026	281.775	338.637	21
osa-miR444b.2>osa-miR444c.2	TGCAGTTGTTGTCTCAAGCTT	147.28	181.254	160.601	39.6839	118.694	77.6167	93.1122	69.6222	51.7447	132.463	88.0978	100.605	116.307	69.8607	158.775	78.5162	68.4804	106.774	10.3938	15.3558	32.4725	36.2869	16.6063	20.7579	48.9364	61.1228	20.2248	9.66193	8.2943	12.8129	46.0985	86.8497	81.5986	27.4751	20.2001	24.5412	43.9634	28.4595	28.3172	59.3678	48.9882	60.2653	33.4309	37.5372	31.6459	21
osa-miR444d.3	TTGTGGCTTTCTTGCAAGTTG	8.60925	9.65864	11.2645	1.2917	7.16174	4.98593	3.81547	7.74303	2.708	7.10336	5.89478	6.93059	9.57578	6.14241	12.0693	9.82623	8.22549	12.6934	1.16348	1.91948	2.1136	3.1751	0.642826	2.64699	5.42508	4.73342	2.00992	1.20774	0.677086	1.96464	5.48791	8.36625	8.43039	2.16909	3.26257	2.17988	3.35901	3.42738	2.79275	7.62826	5.41229	6.33223	2.77341	3.52424	3.24348	21
osa-miR444f	TGCAGTTGTTGCCTCAAGCTT	8.19929	14.1112	11.8443	2.15284	8.4986	6.25101	5.94333	10.2807	3.58627	10.3049	5.57089	7.89938	13.6997	9.47263	15.7425	20.869	17.2344	20.4919	2.79235	1.62417	5.18792	6.577	2.67844	5.29397	12.1787	10.3586	2.5124	1.69084	1.69271	1.45213	0.640256	1.32798	1.25827	0.433817	0.624747	1.1251	0.790354	0.489626	0.259791	0.994991	1.11021	1.3829	0.674614	0.655672	0.262985	21
osa-miR5073	GTTTGGTGAATCGGAAACTATTT	0.512456	0.753511	0.662615	0.0717612	0.28647	0	0.0733744	0.390405	0.0731891	0	0.0647778	0.223567	0.0698962	0.0740049	0.149929	2.90108	2.87239	3.40149	0.155131	0	0	0.226793	0.214275	0.139315	0.110716	0.0686003	0.06281	0	0	0	0.457326	1.06238	1.19535	0.50612	0.416498	0.421912	0.197589	0.122406	0.324739	1.85732	1.24899	1.60125	0.299828	0.245877	0.613632	23
osa-miR5075	TTCTCCGTCGCCGCCGTCCGC	0	0.137002	0	0	0	0	0	0	0	0	0	0	0	0	0	0	0	0	0	0	0	0	0	0	0	0	0	0	0	0	0	0	0	0	0	0	0	0	0	0	0	0	0	0	0	21
osa-miR5076	GAAATGGGAGCAGAGCAGGTTT	0.102491	0.274004	0.0828269	0	0.0954899	0	0	0.130135	0.0731891	0.100047	0.259111	0.372612	0.209689	0.14801	0.149929	0.655082	0.522253	0.331853	0.0775653	0	0.576435	0	0.321413	0.27863	0	0.205801	0	0	0.0846357	0	0.457326	1.06238	0.75496	0.216909	0.208249	0.351593	0.0987943	0.550829	0.0649477	0.72966	0.346942	0.436705	0.299828	0.163918	0.0876617	22
osa-miR5077	GTTCGCGTCGGGTTCACCA	0.409964	0.548008	0.165654	0.0717612	0.38196	0	0	0	0	0.800379	0.0647778	0.521657	0.279585	0.0740049	0.149929	0.0935831	0.39169	0.24889	0	0.073826	0.38429	0	0	0.139315	0.221432	0.137201	0	0.0805161	0	0	0.18293	0.132798	0.314567	0.144606	0.485914	0.140637	0.296383	0.18361	0.649477	0.0663327	0	0.0727842	0.224871	0.081959	0.175323	19
osa-miR5078	CCTCGTTCGACCGTGGCATTT	0	0	0	0	0	0	0	0	0.0731891	0	0	0	0	0	0	0.0935831	0	0	0	0	0	0	0	0	0	0	0	0	0	0	0	0	0	0	0	0	0	0	0	0	0	0	0	0	0	21
osa-miR5079a>osa-miR5079b	TTTGGATCTGTTATTTTGGTAT	0	0	0.0828269	0	0	0	0.146749	0	0	0	0	0.149045	0	0	0.299857	0	0.130563	0	0.0775653	0.073826	0	0	0.107138	0	0	0.137201	0.06281	0	0	0	0.457326	0.132798	0.125827	0.0723029	0.0694163	0.140637	0.197589	0	0	0	0.138777	0.0727842	0.224871	0.081959	0.0876617	22
osa-miR5082	TGCGATGATGGCCGCGCGGGTTCA	0.204982	0	0.248481	0.358806	0.47745	0.520918	0.953868	0.325338	1.3174	0.700331	1.03644	0.521657	0.0698962	0	0.149929	0.0935831	0.261127	0.24889	0.155131	0.36913	0.38429	0	1.39279	1.11452	0.221432	0.480202	0.06281	0.241548	0.253907	0.341677	0	0.0663988	0.125827	0.0723029	0.138833	0.210956	0.592766	0.122406	0.129895	0.530662	0.208165	0.218353	0.224871	0.573713	0.262985	24
osa-miR5083	AGACTACAATTATCTGATCA	0.102491	0.616509	0.828269	0.0717612	0.954899	0	0.146749	0.455473	0.292756	0.200095	0.647778	0.223567	0.279585	0.666044	0.224893	0.280749	0.195845	0.331853	0.155131	0.221478	0	0.907173	1.17851	1.39315	0.332148	0.480202	0.06281	0	0.0846357	0.256258	0.18293	0.331994	0.629134	0.216909	1.11066	0.281274	1.38312	0.428422	0.714425	0.596994	0.208165	0.436705	0.449742	1.06547	0.438308	20
osa-miR5143a>osa-miR5143b	TGTGGTATGTTGGCAATGTAGGAA	0.204982	0.753511	0.496962	0.143522	0.28647	0.595334	0.733744	0.52054	0.439135	0.700331	0.453444	0.29809	0.908651	0.666044	0.749644	0.935831	1.04451	1.07852	0.232696	0.147652	0.960725	0.680379	0.964238	0.139315	0.442863	1.30341	0.50248	0.0805161	0.253907	0.341677	0.823187	1.12878	1.19535	0.216909	0.485914	0.49223	0.889148	0.612032	0.584529	2.12265	1.1796	1.31012	0.824528	0.81959	0.438308	24
osa-miR5144-3p	TCTCCTCAGCAGCACAAGAAG	0.614947	0.68501	1.2424	0.0717612	0.763919	0.297667	0.220123	0.585608	0.0731891	1.00047	0.518222	0.745225	0.419377	0.740049	0.524751	1.40375	0.456971	1.74223	0.155131	0.36913	1.92145	0.453586	0.321413	0	0.996443	0.891804	0.18843	0.161032	0.253907	0.256258	0.457326	0.995983	1.19535	0.216909	0.138833	0.0703186	0.296383	0.428422	0.584529	0.464329	0.277554	0.655058	0.224871	0.245877	0.0876617	21
osa-miR5144-5p	TTCTTGTGCTGCTGAAGAGAC	34.437	49.3892	48.5366	6.31498	44.3073	23.2925	29.5699	23.099	30.4467	39.1185	29.5387	39.4224	33.4803	22.6455	29.3111	42.1124	29.3767	47.7868	9.23027	18.6041	33.2411	26.9884	24.3202	25.216	23.4718	35.6721	13.8182	8.21264	5.9245	7.34605	22.5004	42.6945	38.3142	13.7376	19.7837	19.3376	33.5901	21.2375	19.2245	37.08	28.588	27.3669	20.2384	19.0145	27.2628	21
osa-miR5145	ACCTGTTTGGATTCTTGAGGGCTA	0.102491	0.342505	0.165654	0	0.19098	0.0744168	0	0.130135	0	0.400189	0	0.29809	0.0698962	0.29602	0.449786	0.842248	0.195845	0.580743	0.0775653	0.073826	0	0.453586	0.107138	0.139315	0.332148	0.343001	0.18843	0.0805161	0	0	0.457326	0.464792	0.125827	0.216909	0.347082	0.0703186	0	0.244813	0.324739	0.397996	0.0693884	0.363921	0.299828	0.245877	0.262985	24
osa-miR5146	TTTAACTAATGAACCGGCACCTAT	0	0	0	0	0	0	0	0.0650675	0	0	0.0647778	0.0745225	0	0	0	0	0	0.0829633	0	0	0	0	0	0	0.110716	0	0	0	0	0	0.274396	0.0663988	0	0	0	0	0	0.0612032	0.0649477	0	0.0693884	0	0.0749571	0	0	24
osa-miR5147	ACAACTCTTGTGGATGGAGGG	0.409964	0.205503	0.248481	0	0.28647	0.0744168	0	0.0650675	0.0731891	0.600284	0	0.223567	0.209689	0.222015	0.0749644	0.374332	0.39169	0	0	0.073826	0	0.226793	0.107138	0	0.110716	0	0.06281	0	0	0	0	0.0663988	0.0629134	0	0	0	0	0.0612032	0.0649477	0	0	0	0.0749571	0	0	21
osa-miR5148a>osa-miR5148b>osa-miR5148c	TGAGGGGTAGAAATGTCATATCAT	0.102491	0.274004	0.414135	0.502328	0.859409	0.818585	0.733744	1.04108	0.731891	0.100047	0.518222	0.447135	0.908651	0.666044	0.749644	0.655082	0.587535	0.24889	0.465392	0.295304	0.76858	0.680379	0.321413	0.27863	0.332148	0.686003	0.56529	0.161032	0.761721	0.512515	0.365861	0.331994	0.37748	0.289212	0.624747	0.49223	0.197589	0.795642	0.779373	0.596994	0.624496	0.218353	1.19931	0.573713	0.438308	24
osa-miR5149	GAGGAGCTGTGACGATTTGGGA	0	0	0	0	0	0	0	0	0	0	0.0647778	0	0	0	0.0749644	0.0935831	0	0	0	0.073826	0	0	0	0	0	0.137201	0	0	0	0	0	0.199197	0.0629134	0	0.0694163	0	0	0	0	0.0663327	0.0693884	0	0	0	0.262985	22
osa-miR5150-3p	AGAAGCTGCAGCTGTCAGAAGCTC	6.35445	12.9467	11.8443	3.8751	6.20684	13.6927	14.9684	10.0855	12.7349	8.60407	6.996	8.79365	9.99516	9.91666	11.0947	2.15241	2.35014	1.5763	2.55966	3.91278	2.49789	1.81435	2.99985	3.06493	3.10004	2.60681	2.13554	2.0129	2.3698	3.58761	3.20128	2.32396	1.38409	1.15685	1.59658	2.67211	3.4578	3.7334	3.24739	2.38798	2.42859	2.62023	4.87221	2.70465	4.03244	24
osa-miR5150-5p	AGCTTCTGACAGCTGCAGTTTCTC	11.274	41.5116	28.4096	6.96083	19.4799	20.2414	18.1235	31.6879	13.0277	25.412	26.9476	31.0759	34.6685	25.0877	22.6392	6.17649	9.00887	18.169	5.42957	5.09399	4.80363	6.35021	4.60692	2.92562	5.42508	6.72283	4.89918	5.79716	5.24741	7.94399	16.4637	10.491	11.0098	6.43496	5.13681	7.24282	12.2505	8.75206	7.33909	12.6695	9.02049	10.8448	10.8688	9.83507	8.59084	24
osa-miR5151	TAATGATGTGGGTACGAATGAA	0.614947	0.548008	0.745442	0.0717612	0.763919	0.148834	0.440247	0	0.365945	1.00047	0.259111	0.29809	0.0698962	0.222015	0.0749644	0.467916	0.326408	0.663706	0.0775653	0.073826	0.38429	0	0.107138	0	0.110716	0.274401	0.12562	0.0805161	0	0	0	0.265595	0.314567	0.144606	0.0694163	0.140637	0	0.0612032	0	0.0663327	0.138777	0.145568	0.224871	0	0.262985	22
osa-miR5152-3p	AGACCATGCCTATACCTACCA	0.102491	0.274004	0.331308	0	0.19098	0.22325	0.220123	0.0650675	0.0731891	0.200095	0.453444	0.149045	0.0698962	0.0740049	0.0749644	0	0.39169	0.24889	0	0	0	0	0.214275	0	0.332148	0.274401	0.12562	0	0.0846357	0.0854192	0.18293	0.0663988	0	0.144606	0	0	0	0.0612032	0.259791	0.265331	0.138777	0	0.149914	0.245877	0.175323	21
osa-miR5152-5p	GTAGGGATAGGCATGATCTCT	0	0	0	0	0.19098	0	0	0	0.146378	0.200095	0	0	0	0	0	0.0935831	0	0.165927	0	0	0	0	0	0	0	0	0	0.0805161	0	0	0	0	0	0.0723029	0	0	0	0	0	0.0663327	0	0	0.149914	0	0	21
osa-miR5153	TGGATTCCACTGACACGTAGACGT	0.717438	1.37002	0.662615	0.143522	0.668429	0.744168	1.10062	1.69176	1.3174	0.800379	0.647778	1.11784	1.46782	1.11007	0.599715	0.374332	0.456971	0.995559	0.310261	0.36913	0.76858	0.453586	0.321413	0.139315	0.553579	0.480202	0.43967	0.322064	0.338543	0.341677	1.55491	1.59357	0.75496	1.51836	0.416498	1.05478	0.790354	1.10166	2.01338	1.92365	1.45716	0.582274	1.42418	1.22938	0.964278	24
osa-miR5154	AGCACCAGTTGACGTGACGCTGAG	0.102491	0.137002	0	0	0	0	0	0	0.0731891	0	0	0	0.0698962	0	0.149929	0.374332	0	0	0	0	0	0	0	0	0	0	0	0	0	0	0	0	0.125827	0.144606	0	0	0.0987943	0	0	0.0663327	0.0693884	0	0	0.163918	0	24
osa-miR5155	ACTTTAATACCATTGGAAGATTGC	0	0	0	0	0	0	0	0	0	0	0	0	0	0	0	0	0	0	0	0	0	0	0	0	0	0	0	0	0	0	0	0	0	0	0.0694163	0	0	0	0	0	0	0	0	0	0	24
osa-miR5156	AGCCTGTAAAACTGCAAAAAGGAA	0	0	0	0	0	0	0	0	0	0	0	0	0	0	0	0	0	0	0	0	0	0	0	0	0	0	0	0	0	0	0.548791	0.0663988	0.251653	0	0.0694163	0.210956	0	0	0.0649477	0.397996	0.0693884	0.291137	0	0.245877	0.262985	24
osa-miR5157a-3p>osa-miR5157b-3p	AGAAGTTGTGGCTATCAAAAAGTT	0.512456	0.479507	0.496962	0	0.28647	0.520918	0.807119	0.845878	0.219567	0.300142	0.518222	0.670702	0.838755	0.370025	0.524751	0	0.0652816	0	0	0	0	0	0	0	0.110716	0	0	0	0	0.0854192	0	0.199197	0.125827	0.0723029	0.138833	0.210956	0	0.0612032	0.129895	0	0	0	0	0.081959	0	24
osa-miR5157a-5p>osa-miR5157b-5p	AACTTTTTAATAGCTACAACTTCT	0	0	0.165654	0	0	0	0.0733744	0.26027	0	0	0.129556	0.0745225	0.0698962	0.14801	0.224893	0	0	0	0	0	0	0	0	0	0	0	0	0	0	0	0.18293	0.0663988	0.125827	0	0	0.0703186	0	0	0	0.198998	0.0693884	0	0	0.081959	0	24
osa-miR5158	TGAGCCACTGGGATGAGGATGAAT	0	0.137002	0.165654	0.0717612	0.19098	0.22325	0.0733744	0.0650675	0	0.200095	0.129556	0.223567	0.0698962	0.29602	0	0	0.0652816	0.24889	0	0.073826	0	0	0	0	0	0.137201	0.06281	0	0	0	0.0914652	0.199197	0.125827	0.0723029	0.138833	0.0703186	0.0987943	0.0612032	0	0.132665	0.555107	0	0	0	0.350647	24
osa-miR5159	AACTAGAGTGGGTCAACGGGTACC	0.307473	0.137002	0.496962	0.0717612	0.47745	0.297667	0.0733744	0.325338	0.146378	0.700331	0.194333	0.670702	0.55917	0.666044	0.449786	0.374332	0.261127	0.165927	0.0775653	0.36913	0.38429	0.680379	0.321413	0.417945	0.332148	0.548802	0.06281	0.0805161	0.253907	0.427096	0.18293	0.796786	0.692047	0	0.138833	0.351593	0.296383	0.244813	0.259791	0.397996	0.208165	0.0727842	0.0749571	0.163918	0.175323	24
osa-miR5160	CGAGATCGATGGTATATTTCTG	0.204982	0.137002	0.331308	0	0.28647	0.0744168	0.0733744	0	0.0731891	0.200095	0.129556	0.149045	0.139792	0	0.0749644	0	0	0.165927	0	0	0.192145	0	0	0	0.110716	0.0686003	0	0	0	0	0	0	0	0	0	0.140637	0	0.0612032	0.0649477	0	0	0	0	0	0	22
osa-miR5161	TCTGGATCAGAGGGAGTATA	0	0.137002	0	0	0.28647	0	0.0733744	0.0650675	0	0.300142	0	0.149045	0.0698962	0	0.149929	0.0935831	0.195845	0.165927	0	0	0	0	0	0	0.110716	0.205801	0	0.0805161	0	0	0.0914652	0.0663988	0	0	0.0694163	0	0.0987943	0	0	0.0663327	0	0.0727842	0	0	0.0876617	20
osa-miR5162	AAATGACCAAAATACCCCTAGAAC	0	0	0	0	0	0	0.0733744	0	0	0	0	0.0745225	0	0	0.0749644	0.0935831	0	0	0.0775653	0	0	0	0	0	0.110716	0	0.06281	0.161032	0.0846357	0	0	0.265595	0.0629134	0	0	0	0.0987943	0	0.0649477	0.0663327	0.0693884	0.0727842	0	0	0	24
osa-miR528-3p	CCTGTGCTTGCCTCTTCCATT	1.02491	1.78103	1.73937	0.287045	3.24666	1.63717	3.81547	6.70195	5.12324	2.40114	0.777333	1.93758	3.42492	3.47823	5.84722	98.8238	58.2965	62.5543	38.4724	2.65773	46.8834	51.2553	3.85695	10.7273	20.9253	22.7067	6.34381	3.30116	4.40106	3.33135	45.2753	99.0007	202.77	22.6308	13.3973	16.103	25.5877	20.2583	31.6945	36.682	38.9963	91.1258	48.1224	41.3893	26.2985	21
osa-miR528-5p	TGGAAGGGGCATGCAGAGGAG	6.45694	11.0972	9.27662	2.94221	15.0874	7.21843	5.35633	10.4108	9.14864	10.4049	5.18222	10.0605	5.80139	7.03047	8.09615	177.621	267.524	335.503	202.678	26.2082	123.165	398.476	16.4992	26.3306	66.8724	91.3756	14.3835	49.4369	41.7254	67.3104	50.0315	78.085	157.535	49.166	63.0994	53.3718	92.175	106.004	70.1435	109.913	74.4537	140.837	90.3982	138.183	76.9669	21
osa-miR529a	CTGTACCCTCTCTCTTCTTC	0.102491	0	0	0.0717612	0	0	0	0	0	0	0	0	0	0	0	0	0	0	0	0	0	0	0	0	0.110716	0	0	0	0	0	0	0	0	0	0	0	0	0	0	0	0	0	0	0	0	20
osa-miR529b	AGAAGAGAGAGAGTACAGCTT	1.02491	1.37002	1.82219	0.358806	0.954899	0.520918	1.46749	1.36642	1.39059	1.60076	1.23078	1.56497	1.11834	1.11007	1.49929	0.280749	0.326408	0.414816	0.155131	0	0.576435	0.226793	0	0.27863	0.332148	0.137201	0.18843	0	0	0	0.365861	0.796786	1.19535	0.0723029	0.277665	0.421912	0.790354	0.489626	1.3639	0.862325	0.624496	0.145568	0.824528	0.491754	0.350647	21
osa-miR530-3p	AGGTGCAGAGGCAGATGCAAC	0	0	0	0	0	0	0	0	0	0	0	0	0	0	0	0	0	0	0	0	0	0	0.107138	0	0	0.0686003	0	0	0	0	0	0	0	0	0	0	0	0	0	0.132665	0	0	0.224871	0	0	21
osa-miR530-5p	TGCATTTGCACCTGCACCTA	0	0	0	0	0	0	0	0.0650675	0	0	0	0	0	0	0.0749644	0.0935831	0.0652816	0	0	0.073826	0.192145	0	0.107138	0	0	0.0686003	0.06281	0.0805161	0	0	0.0914652	0.0663988	0.440394	0.144606	0.138833	0.0703186	0.0987943	0.122406	0.129895	0.663327	0.138777	0.218353	0.149914	0.081959	0.175323	20
osa-miR5337a	AAATTACTTGTCGTTCTAGCT	0	0	0	0	0	0	0	0	0	0	0	0.0745225	0.0698962	0	0.149929	0.0935831	0.130563	0.0829633	0	0	0	0	0	0	0	0.0686003	0.12562	0	0	0	0	0.0663988	0	0	0	0	0	0	0	0.132665	0	0	0.0749571	0	0	21
osa-miR5337b	CTAGAACGGCAAGCAATTTGA	0	0.068501	0.0828269	0	0	0	0	0	0	0	0	0	0	0	0	0	0	0	0	0	0	0	0	0	0	0	0	0	0	0	0	0	0	0	0	0	0	0	0	0	0	0.145568	0	0	0	21
osa-miR5339	CAGATAGAGAATCTTCTCAGA	0	0	0.0828269	0	0	0	0	0	0	0	0	0	0.0698962	0	0.0749644	0	0	0	0	0	0	0.680379	0	0	0.110716	0	0	0	0	0	0	0	0	0	0	0	0	0	0.0649477	0	0.138777	0	0	0.245877	0.0876617	21
osa-miR5340	TGATGACGTGGATGAATTTCAAA	0.307473	0	0.165654	0	0.28647	0.0744168	0.0733744	0	0.146378	0.200095	0.0647778	0.149045	0.139792	0.0740049	0.149929	0.0935831	0.0652816	0.24889	0	0.073826	0	0	0	0	0	0	0	0	0	0	0.18293	0.199197	0.0629134	0.0723029	0.138833	0.140637	0.395177	0.18361	0.259791	0.132665	0.0693884	0	0.224871	0	0.0876617	23
osa-miR535-3p	GTGCTTTCTCCCGTTGTCACT	2.15231	2.80854	1.98785	0.717612	1.81431	1.63717	2.34798	2.27736	0.878269	1.40066	0.971667	2.3102	2.51626	2.51617	1.87411	3.36899	3.1988	4.23113	0.387827	0.295304	1.72931	0.453586	0.535688	0.696575	1.66074	2.33241	0.50248	0.40258	0.677086	0.341677	7.40868	16.2013	15.9171	1.95218	2.08249	3.23466	2.17347	2.57053	2.46801	6.83227	4.30208	5.45881	1.94888	2.37681	0.701293	21
osa-miR535-5p	TGACAACGAGAGAGAGCACGC	6.66192	12.1932	9.27662	2.08107	8.30762	3.34876	7.41082	7.22249	4.83048	12.4059	6.15389	11.3274	8.03807	7.17848	7.27154	4.77274	4.30859	6.96891	2.32696	2.80539	2.88218	2.49472	2.78558	3.34356	5.20365	9.80984	1.50744	1.61032	1.77735	1.45213	21.5858	42.8272	54.6717	13.5206	9.16295	16.103	29.8359	22.1556	29.9409	46.4329	24.6329	31.7339	19.3389	25.4892	17.2693	21
osa-miR5484	AACCGAGCGCGCTGTTGATTA	0	0	0	0	0	0	0	0	0	0	0	0	0	0	0	0	0	0	0	0	0	0	0	0	0	0	0	0	0	0	0	0	0.125827	0	0	0	0.0987943	0	0	0.0663327	0.138777	0	0.0749571	0	0	21
osa-miR5486	AGGGGCTTGCATATTCTACCA	0	0	0	0	0	0	0	0	0	0	0.0647778	0	0	0	0	0	0	0	0	0	0	0	0	0	0	0	0	0	0	0	0	0	0	0	0	0	0	0	0	0	0	0	0	0	0	21
osa-miR5493	AGCCGGGCTCGGTCGCGCGTG	1.94733	0.753511	1.40806	1.00466	1.9098	0.818585	0.586995	0.325338	1.39059	1.60076	1.23078	1.26688	1.04844	0.370025	0.899572	0.374332	0.718098	0.580743	0.387827	0.221478	1.34502	0.453586	0.857101	1.11452	1.77145	1.2348	0.12562	1.04671	0.930993	1.28129	0.365861	0.663988	0.56622	0.216909	0.277665	0.703186	0.69156	0.979251	0.84432	0.596994	0.346942	0.582274	0.974442	3.03248	0.876617	21
osa-miR5498	TGAGCTGTAACACTTGAAGAC	0	0	0.165654	0	0	0	0	0	0	0	0	0	0.0698962	0	0.0749644	0	0	0	0	0	0	0	0	0	0	0	0	0	0	0	0	0	0	0	0	0	0	0	0	0	0	0	0	0	0	21
osa-miR5500	ATCACTGATGAAATCTTGCGGC	0	0.068501	0	0	0	0	0	0.130135	0	0	0	0	0	0	0	0	0	0	0	0	0	0	0	0	0	0	0	0	0	0	0	0	0	0	0	0	0	0	0	0	0	0	0	0	0	22
osa-miR5501	TCTTGTGGCTAGAAGGGTGAG	0.204982	0.68501	0.331308	0.215284	0.47745	0.372084	0.293498	0.976013	0.292756	1.00047	0.194333	0.670702	0.629066	0.740049	0.599715	0.561499	1.30563	0.995559	0.0775653	0	1.15287	0	0	0.139315	0.442863	0.137201	0.06281	0.0805161	0.253907	0	0.0914652	0.531191	0.440394	0.289212	0.208249	0.281274	0.0987943	0.18361	0.129895	0.397996	0.555107	0.727842	0.524699	0.163918	0.0876617	21
osa-miR5502	TACGGATACGGATACGCGATAC	0	0	0	0	0.0954899	0	0	0.0650675	0	0	0	0	0	0	0	0	0	0	0	0	0	0	0	0	0	0	0	0	0	0.0854192	0	0	0.0629134	0	0	0	0	0	0	0	0	0.145568	0	0	0	22
osa-miR5503	TTCGGATCTTTCTAGAGGCATT	0.307473	0.205503	0.248481	0.0717612	0.28647	0.0744168	0.146749	0.195203	0.0731891	0.300142	0.388667	0.149045	0.0698962	0.59204	0.299857	0.280749	0.587535	0.414816	0	0.073826	0	0.226793	0	0.139315	0	0.686003	0.25124	0.161032	0.253907	0.256258	0.0914652	0.464792	0.18874	0.0723029	0	0.0703186	0.493971	0.0612032	0.194843	0.132665	0.277554	0.363921	0.0749571	0	0	22
osa-miR5504	AGTGACGGGAGGACTGCAAGG	1.33238	1.09602	1.15958	0.645851	2.29176	0.446501	0.440247	0.26027	1.53697	2.10099	2.52633	1.41593	0.209689	0.0740049	0.224893	1.40375	0.913943	1.24445	0.155131	0.590608	2.69003	3.1751	5.35688	8.91617	1.88217	1.78361	0.06281	0.724645	0.507814	0.597935	0.274396	0.863185	0.692047	0.578423	0.624747	0.210956	2.46986	2.69294	2.14327	2.45431	0.832661	0.727842	1.19931	1.3933	1.92856	21
osa-miR5505	GAGGATTCGGTATTGATCGCTA	0.204982	0.616509	0.414135	0	0.38196	0.22325	0.586995	0.0650675	0.146378	0.400189	0.194333	0.521657	0.209689	0	0	0.467916	0.0652816	0.165927	0.0775653	0.073826	0	0.226793	0	0	0	0.343001	0	0	0.0846357	0.0854192	0	0.265595	0.18874	0	0.0694163	0.210956	0.0987943	0.122406	0	0.198998	0.346942	0.145568	0	0	0.0876617	22
osa-miR5507	AATGAGAATGATGACCCGGTG	0	0	0	0	0	0	0	0	0	0	0	0	0	0	0	0	0	0	0	0	0	0	0	0	0	0	0	0	0	0	0	0	0	0	0	0	0.0987943	0	0	0	0	0	0	0	0	21
osa-miR5508	TAGATGGCTGATCTGGTGTGG	2.45979	3.01404	2.73329	0.645851	4.39254	1.71159	1.54086	2.27736	2.19567	3.70175	1.87856	3.12994	2.86575	1.33209	2.92361	3.27541	2.87239	2.07408	1.00835	0.664434	4.41934	2.26793	0.749963	1.95041	2.98933	3.49861	0.75372	1.36877	1.26954	1.19587	1.28051	2.52316	2.57945	1.51836	2.42957	1.75797	1.97589	1.71369	2.07833	2.58698	2.35921	2.32909	1.42418	1.31134	1.31492	21
osa-miR5510	AGGCTGATCCACTCCAGAGGA	0.614947	0.274004	0.248481	0	1.52784	0.446501	1.24737	0.390405	0.585513	0.900426	0.583	0.29809	0.279585	0.0740049	0.374822	0.935831	0.78338	0.995559	0.0775653	0.442956	0.960725	0	0.107138	0.139315	0.553579	0.891804	0.18843	0.40258	0.423179	0.427096	0	0.398393	0.9437	0.144606	0.0694163	0	0.197589	0.18361	0.129895	0.0663327	0.277554	0.145568	0.149914	0.081959	0.350647	21
osa-miR5511	CATATCCCAGCTGTTTCGGCC	0	0	0	0	0	0	0	0	0	0	0	0	0	0	0	0	0.0652816	0	0	0	0	0	0	0	0	0	0	0	0	0	0	0	0	0	0	0	0	0	0	0	0	0	0	0	0	21
osa-miR5512a>osa-miR5512b	TAGGATATGGTAATGCTAAAA	0.204982	0.137002	0.248481	0	0.28647	0	0.220123	0.0650675	0.0731891	0.600284	0.129556	0.149045	0.209689	0.0740049	0.224893	0.187166	0.652816	0.49778	0.232696	0.147652	0	0	0.214275	0.27863	0.110716	0.137201	0	0	0	0.0854192	0.0914652	0.464792	0.314567	0	0.0694163	0.140637	0.296383	0.18361	0	0.0663327	0.485719	0.145568	0.374785	0	0	21
osa-miR5513	TAACAAAGGACAACAGACTGA	4.71459	4.65807	5.96354	1.14818	4.7745	2.15809	1.98111	2.86297	1.82973	4.50213	1.55467	3.42803	3.21523	2.29415	5.77226	4.21124	3.39464	3.1526	1.16348	2.21478	2.88218	3.4019	1.92848	2.36836	4.65007	3.29281	2.26116	0.724645	0.761721	1.96464	1.73784	1.85917	1.69866	1.37376	1.11066	1.47669	1.18553	1.71369	2.92265	2.05631	3.12248	1.31012	2.39863	2.13093	2.01622	21
osa-miR5522	AACAATAGGAATGGGAGGCAT	0.102491	0	0	0	0	0	0	0	0	0	0	0	0	0	0	0	0.0652816	0.165927	0	0	0	0	0	0	0	0	0.06281	0	0	0	0	0	0	0	0	0	0	0	0	0	0	0	0	0	0	21
osa-miR5523	TGAGGAGGAACATATTTACTAG	0	0.274004	0	0.645851	0.0954899	0	0	0	0.0731891	0.100047	0.0647778	0	0	0	0	0.0935831	0.195845	0	0	0	0	0.226793	1.07138	0.696575	0	0.0686003	0.12562	0	0	0.0854192	0	0.0663988	0.125827	0	0	0	0.296383	0.0612032	0.0649477	0	0	0.0727842	0	0.245877	0	22
osa-miR5525	TGAACCTTGGGAGCGATCTGAA	0	0.068501	0	0	0.0954899	0	0	0	0	0.100047	0	0	0	0	0	0	0	0	0	0	0	0	0	0	0	0	0	0	0	0	0	0.0663988	0.0629134	0	0	0	0	0	0	0	0	0	0	0.081959	0	22
osa-miR5526	AAAGGTAGAGTCAGGTATGAG	0	0	0.0828269	0	0.0954899	0	0	0.130135	0	0	0	0	0	0	0	0	0	0	0	0.073826	0	0	0	0	0	0	0	0	0	0	0	0	0	0	0	0	0	0	0	0	0	0	0	0	0	21
osa-miR5532	ATGGAATATATGACAAAGGTGG	0	0	0	0	0	0	0	0	0	0	0	0	0	0	0	0	0.130563	0	0	0	0	0	0	0	0	0.0686003	0.06281	0	0	0	0.0914652	0	0	0	0	0.0703186	0	0	0.129895	0.0663327	0	0.145568	0	0	0	22
osa-miR5534a	TGACGACAACAGCTAGAATGG	0	0	0	0.0717612	0	0	0	0	0	0	0	0	0	0	0	0	0	0	0	0	0	0	0	0	0	0	0	0	0	0	0	0.0663988	0	0	0	0	0	0	0	0	0	0	0	0	0	21
osa-miR5536	AATGGTAGTGACATTATGGTAG	0	0.068501	0	0.0717612	0	0	0.0733744	0	0	0	0.129556	0.0745225	0.139792	0.14801	0.0749644	0.187166	0	0.165927	0	0	0.38429	0	0	0.139315	0.110716	0.0686003	0	0	0	0	0.0914652	0.199197	0.0629134	0.216909	0	0.210956	0	0	0.0649477	0.0663327	0.138777	0.291137	0.0749571	0.081959	0	22
osa-miR5537	AATGTTTGTATGGATCGTTTGT	0	0	0	0	0	0	0	0	0	0	0	0.0745225	0	0	0	0	0.0652816	0	0	0	0	0	0	0	0	0	0	0	0	0	0.0914652	0	0	0	0	0	0	0	0	0.0663327	0	0	0	0	0	22
osa-miR5538	ACTGAACTCAATCACTTGCTGC	0.307473	0.205503	0.0828269	0	0.19098	0.0744168	0	0.0650675	0.0731891	0.300142	0.259111	0.0745225	0	0.0740049	0	0.187166	0.261127	0.912596	0	0	0	0.226793	0	0	0	0	0	0	0	0	0	0.132798	0	0.0723029	0.138833	0	0	0	0	0.0663327	0	0.145568	0	0	0.0876617	22
osa-miR5539a>osa-miR5539b	AAGAAAACGGATGCGCGTGCTA	0	0	0	0	0	0	0.0733744	0	0.0731891	0	0	0	0	0	0	0.0935831	0	0.0829633	0	0	0	0	0	0	0	0	0	0	0	0	0	0	0	0	0	0	0	0	0	0	0	0	0	0	0	22
osa-miR5540	TTGTGCGAGATCGACGGTATA	2.66477	5.06907	4.72113	0.358806	2.8647	2.38134	3.08173	1.82189	1.3174	3.30156	0.971667	3.50256	2.44637	2.44216	2.62375	2.15241	1.24035	2.4889	0.232696	0.295304	2.69003	1.58755	0.535688	0.417945	2.21432	2.26381	1.13058	0.483097	0.677086	1.53755	1.73784	2.19116	1.82449	0.795332	1.04124	1.40637	0.889148	1.59128	1.29895	1.45932	1.8041	2.03796	1.42418	1.3933	2.9805	21
osa-miR5541	TCAAGTGGTGTACTCTAAAGA	0	0	0	0	0.0954899	0	0	0	0	0	0.0647778	0	0	0	0	0	0.130563	0.0829633	0.0775653	0.221478	0	0	0.107138	0	0	0.137201	0	0	0	0	0.0914652	0	0.0629134	0.144606	0.0694163	0	0.197589	0.0612032	0.129895	0	0	0	0	0	0	21
osa-miR5542	TTTGAGAAGGTATCATGAGAT	3.89466	3.76756	4.05852	1.2917	3.34215	2.75342	1.61424	4.61979	1.09784	4.40208	2.39678	3.20447	4.61315	3.10821	6.5219	4.30482	3.59049	5.39261	1.70644	0.959738	1.92145	4.98945	2.14275	1.8111	4.76078	2.88121	2.07273	0.483097	0.253907	1.28129	0.548791	1.26158	1.82449	0.650726	0.624747	0.351593	1.08674	1.22406	1.03916	1.52565	1.24899	1.01898	0.974442	0.491754	1.1396	21
osa-miR5543	TATGAATGGTATATTTTCTTG	0	0	0	0.0717612	0	0	0	0	0	0	0	0	0	0	0	0	0	0	0	0	0	0	0	0	0	0	0	0	0	0	0	0	0	0	0	0	0	0	0	0	0	0	0	0	0	21
osa-miR5788	TGGATGTGACATACTCTAGTA	16.0911	18.7008	15.9028	3.94686	9.83546	6.77193	6.3102	7.4177	4.83048	12.1057	8.745	10.5822	11.3232	5.55037	15.2927	21.8984	18.1483	34.0149	4.26609	6.20138	7.6858	9.07173	6.42826	8.21959	11.8466	11.8678	5.52728	1.85187	2.28516	2.39174	10.9758	16.2013	17.8045	4.8443	5.41447	3.58625	7.40957	4.65144	5.52056	10.2152	8.32661	11.4999	5.47187	4.75362	5.08438	21
osa-miR5790	AAGACGATCCTAGCAGAGCTTCAT	0	0	0	0	0	0	0	0.0650675	0	0	0	0	0	0	0	0	0	0	0	0	0	0	0.107138	0	0	0	0	0	0	0	0	0	0	0	0	0	0	0	0	0	0	0	0	0	0	24
osa-miR5794	TGAGGAATCACTAGTAGTCGT	657.993	737.139	734.178	124.219	670.339	464.212	469.45	352.21	294.952	747.754	535.129	592.826	507.586	379.571	627.452	445.456	413.429	641.389	111.074	102.101	264.199	204.567	118.923	149.206	285.425	317.07	169.901	97.7465	91.9144	127.958	228.572	380.465	299.719	156.319	142.512	168.835	223.571	159.557	155.225	264.469	267.145	284.077	190.616	206.045	189.525	21
osa-miR5799	AAGACGAATAATCAAACGTTGGAC	0	0	0	0	0	0	0	0.0650675	0	0	0	0	0	0	0.0749644	0	0	0	0.0775653	0	0	0	0	0	0.110716	0	0	0	0	0	0	0	0	0	0	0	0	0	0	0	0	0	0	0	0	24
osa-miR5801a	ACCAAATCGTTTTCGATCGTTGGA	0	0	0	0	0	0	0	0	0	0	0	0	0.0698962	0	0	0.0935831	0	0	0	0	0	0	0	0	0	0	0	0	0	0	0.0914652	0	0.0629134	0	0	0	0	0	0.0649477	0	0	0	0	0	0	24
osa-miR5801b	ACTAAATCGTTTCTGATCGTTGGA	0	0	0	0	0	0.0744168	0	0	0	0	0	0	0	0	0	0.0935831	0	0.0829633	0	0	0	0	0	0	0	0	0.06281	0	0	0	0	0	0	0	0	0	0	0	0	0.132665	0	0	0	0	0.0876617	24
osa-miR5801c-3p	TAGATCCAACAATCGAAAACG	0	0.068501	0.165654	0	0	0	0	0.195203	0	0.100047	0.0647778	0	0.0698962	0.0740049	0	0	0	0	0	0.073826	0	0.226793	0	0	0	0	0	0	0	0	0.0914652	0.0663988	0	0	0.0694163	0	0	0.18361	0.129895	0.0663327	0	0	0	0	0.0876617	21
osa-miR5802	ATGGACTGTACTTTGTAAAGCGGA	0.102491	0.342505	0.248481	0	0	0.148834	0.513621	0.455473	0.219567	0.400189	0.323889	0.521657	0.629066	0.14801	0.224893	0.561499	0.587535	0.746669	0.0775653	0.073826	0.192145	0.453586	0.321413	0.139315	0.221432	0.548802	0.25124	0.161032	0.169271	0.170838	0	0.464792	0.314567	0.0723029	0.347082	0.0703186	0.197589	0.122406	0.454634	0.397996	0.346942	0.509489	0.374785	0.327836	0.438308	24
osa-miR5803	ACCACTGTAGACGCTACGTGTGAG	0	0	0	0	0	0	0	0	0	0	0	0	0	0	0	0.0935831	0	0.0829633	0	0.073826	0	0	0	0	0	0	0	0	0	0.170838	0.0914652	0	0	0	0	0	0	0	0	0	0	0	0	0	0.0876617	24
osa-miR5804	TGCGAAGTAGAGATGCCGACT	1.63986	0.959014	1.40806	0.358806	1.71882	0.967419	0.513621	1.30135	0.585513	1.50071	0.647778	1.04331	0.908651	0.59204	1.34936	1.40375	1.10979	2.40593	0.310261	0.221478	1.53716	3.1751	0.214275	0.139315	0.775011	0.548802	0.37686	0.483097	0.423179	0.427096	0.365861	0.796786	0.440394	0.216909	0.555331	0.351593	0.493971	0.489626	0.454634	0.0663327	0.693884	0.363921	0.374785	0.491754	0.262985	21
osa-miR5805	ACGAGTGATGGCGGCGTATACCTG	0	0.616509	0.248481	0.0717612	0.19098	0.372084	0.66037	0.715743	0.439135	0.200095	0.259111	0.447135	0.419377	0.14801	0.599715	0.561499	0.130563	0.49778	0	0	0.192145	0	0.214275	0	0.110716	0.205801	0.18843	0.322064	0	0.0854192	0	0.331994	0.251653	0.0723029	0.208249	0.0703186	0.0987943	0.122406	0.454634	0.331664	0.41633	0.145568	0.0749571	0	0	24
osa-miR5807	AGGAGGTCTGGAGAGTTATGTGGC	0	0.068501	0.414135	0.0717612	0.0954899	0.148834	0.220123	0.130135	0.219567	0.100047	0.129556	0.149045	0.279585	0.370025	0.0749644	0.0935831	0.39169	0.414816	0.0775653	0	0	0.226793	0	0	0.332148	0.0686003	0	0	0.0846357	0.170838	0.274396	0.398393	0.314567	0.0723029	0.0694163	0.351593	0.0987943	0	0.259791	0.397996	0.277554	0.218353	0.224871	0	0.350647	24
osa-miR5809	TCGTCGCCGGCGACCACAGC	0.512456	0.479507	0.248481	0	1.24137	0.148834	0.440247	0.650675	0.219567	0.700331	0.194333	0.223567	0.978547	0.518035	0.524751	1.02941	0.587535	0.49778	0.155131	0.073826	0.192145	0.453586	0.321413	0.27863	0	0.548802	0.31405	0	0.0846357	0	0.274396	0.331994	0.503307	0.144606	0.138833	0.0703186	0.592766	0.428422	0.194843	0.596994	0.41633	0.291137	0.524699	0	0.350647	20
osa-miR5810	ACGGAACCCTAATGGCGATGGCAT	0	0	0	0	0	0	0	0	0	0	0.0647778	0	0	0	0	0.0935831	0	0	0	0	0	0	0	0	0	0.0686003	0	0	0	0	0	0	0	0	0	0.0703186	0	0	0.0649477	0	0	0.145568	0	0	0	24
osa-miR5811	CCTAACCTAGGAGTTCGATGGGAC	0	0	0	0	0	0	0	0	0	0	0	0	0	0	0	0	0	0	0	0	0	0	0	0	0	0	0	0	0	0	0	0	0	0	0	0	0	0	0.0649477	0.0663327	0.138777	0.0727842	0	0.081959	0	24
osa-miR5812	AGCAACGATTTTAAGATTGTGGCA	0	0	0	0	0	0	0	0	0	0	0	0	0	0	0	0	0	0	0	0	0	0.226793	0	0	0	0	0	0	0	0	0	0	0	0.0723029	0	0	0	0	0	0	0	0	0	0.163918	0	24
osa-miR5813	AAGCAGCGACTCTGGTCATGGA	1.02491	3.35655	1.98785	0.430567	3.24666	2.15809	1.39411	1.23628	1.53697	3.8018	2.00811	3.27899	1.53772	2.29415	2.54879	2.43316	3.06824	2.24001	1.08591	0.885912	2.30574	2.49472	1.07138	1.39315	2.43575	2.81261	1.63306	1.69084	0.930993	1.11045	1.73784	2.19116	1.50992	0.939938	1.04124	1.75797	1.87709	2.08091	1.55875	1.72465	1.24899	0.946195	2.0988	1.06547	1.22726	22
osa-miR5814	AATCAAGTTAGGAACCATGCAAGT	8.0968	8.97363	10.3534	2.08107	10.4084	11.1625	14.6749	6.37662	10.1733	13.6064	9.58711	15.0535	6.08097	6.58644	8.92076	18.5295	13.5133	14.9334	3.64557	6.93964	4.80363	6.35021	4.07123	5.5726	6.20009	18.7965	7.85125	7.72954	7.53258	6.2356	12.0734	18.7909	20.9501	6.65187	4.92856	9.70397	9.28666	6.85476	5.32571	20.0325	12.4899	18.0505	8.91989	11.8021	8.06487	24
osa-miR5815	AATGTTATGGACACTAGATGACAT	0	0.068501	0	0.0717612	0	0	0.0733744	0.130135	0.0731891	0	0	0	0	0	0	0	0	0	0	0.073826	0	0.226793	0	0.139315	0	0	0	0	0	0	0.18293	0	0	0	0	0.140637	0.0987943	0.0612032	0.0649477	0.0663327	0	0	0	0	0	24
osa-miR5816	TAGGAGTGTTTGTAGGAGCGCCAC	0	0.068501	0	0	0.0954899	0	0	0	0	0	0	0	0.139792	0.0740049	0.149929	0	0	0	0	0	0	0	0	0	0.221432	0	0.06281	0.0805161	0	0	0	0.0663988	0	0	0	0	0.0987943	0	0	0.0663327	0.0693884	0	0.0749571	0	0.0876617	24
osa-miR5817	ATCGAATTTGAAAGAAAAAGGTAT	0.204982	0	0	0	0.0954899	0	0	0	0	0	0	0	0	0	0	0	0	0	0	0	0	0	0	0	0	0	0	0	0	0	0	0	0	0	0	0	0	0	0	0	0	0	0	0	0	24
osa-miR5821	TGGACGGAGCGATGGTGGGCG	0	0	0	0	0	0	0	0	0	0	0	0	0	0	0	0	0	0	0	0	0	0	0	0	0	0	0	0	0	0	0.0914652	0.132798	0	0	0.0694163	0	0	0	0	0	0.0693884	0	0	0	0	21
osa-miR5823	AAGGAATTGGGTCTAATCTCTTCC	0	0	0.165654	0	0.0954899	0	0.0733744	0.195203	0	0	0.0647778	0.372612	0.0698962	0.0740049	0.0749644	0.374332	0.326408	0.414816	0.387827	0.073826	0.192145	0	0	0	0.221432	0.343001	0.06281	0.161032	0.0846357	0	0.18293	0	0.0629134	0	0.138833	0	0	0.0612032	0	0	0.208165	0.291137	0.0749571	0	0	24
osa-miR5824	AGTCTGATAAGAAGTCAATGGCGT	0	0	0	0	0	0	0	0	0	0	0	0.0745225	0	0	0	0	0	0.165927	0	0.073826	0	0	0.107138	0	0	0	0	0	0	0	0	0	0	0	0	0	0	0	0	0	0	0	0	0	0	24
osa-miR5825	AAAACATCTGATAACCTGAAACGG	0	0.205503	0	0	0	0	0	0.195203	0	0.100047	0.129556	0	0.279585	0.222015	0.299857	0.0935831	0	0.24889	0.232696	0.073826	0.192145	0	0.214275	0	0	0	0.12562	0	0.253907	0	0	0.132798	0.0629134	0	0	0	0	0	0.129895	0.0663327	0	0	0.0749571	0	0.175323	24
osa-miR5826	TAGCCCAAAGTGAGAAGAGTGGGT	0.102491	0.274004	0	0	0.28647	0.22325	0	0.325338	0.146378	0.200095	0.129556	0.372612	0.139792	0.222015	0.149929	0	0	0	0	0.073826	0.38429	0	0	0.139315	0.221432	0.0686003	0.50248	0	0	0.170838	0.0914652	0.0663988	0	0.216909	0.0694163	0.0703186	0.0987943	0.244813	0.324739	0.132665	0	0	0.149914	0.163918	0.0876617	24
osa-miR5827	TTTGTTGCAATTTGGACTACC	4.81708	5.75408	7.20594	0.502328	3.24666	1.71159	3.00835	2.01709	2.78119	5.30251	3.82189	3.20447	3.98409	1.85012	4.87268	6.17649	7.1157	10.8682	2.55966	3.17452	4.22719	3.1751	1.49993	1.8111	5.20365	4.25322	4.14546	1.28826	1.43881	2.2209	4.4818	6.70628	6.41716	3.32593	2.5684	2.88306	3.26021	2.08091	1.75359	4.64329	4.92658	8.37018	3.52298	2.95052	2.89283	21
osa-miR5828	TTACGGCATTAAAAGTAAATC	0	0	0	0	0	0	0.146749	0.0650675	0	0.100047	0	0	0.139792	0	0.0749644	0.0935831	0.0652816	0	0	0	0	0	0	0	0	0.0686003	0.06281	0	0	0	0.274396	0.132798	0	0	0	0	0	0	0	0	0.0693884	0.0727842	0	0	0	21
osa-miR5829	ATCAGGACCAGTAGGCGATGGTAA	0	0	0	0	0	0	0	0	0	0	0	0	0	0	0	0	0	0.0829633	0	0	0	0	0	0	0	0	0	0	0	0	0	0	0	0	0	0	0	0	0	0	0	0	0	0	0	24
osa-miR5830	ATGTAGATGAGGTGATGTTACACA	0	0	0	0	0	0	0	0	0	0	0	0.0745225	0	0	0	0	0.130563	0	0	0	0	0	0	0	0	0	0	0	0	0	0	0	0	0	0	0	0	0	0.0649477	0	0	0	0	0	0	24
osa-miR5831	TAGTCAAACTTAGAATAGTTGGAC	0	0	0	0	0	0.0744168	0	0.0650675	0	0	0	0.0745225	0	0	0.0749644	0.187166	0	0	0	0	0	0	0	0	0	0	0	0	0	0.0854192	0	0	0	0	0	0	0	0	0	0	0.0693884	0.0727842	0	0	0	24
osa-miR5833	TCCTCCTCGGGCTCATCGGGC	0.409964	0.068501	0.0828269	0.0717612	0.47745	0.148834	0.146749	0.0650675	0	0.500237	0	0.0745225	0	0.0740049	0	0	0	0	0	0	0	0	0	0	0	0.0686003	0	0	0	0	0	0	0	0	0.138833	0	0	0	0.0649477	0.132665	0.0693884	0	0	0	0	21
osa-miR6245	AGTATAGGTGTCGGCTCTATT	0	0.068501	0	0	0	0	0	0	0	0	0.0647778	0	0	0	0	0	0	0.0829633	0	0	0	0	0	0	0	0	0	0	0	0	0	0	0	0	0	0	0	0	0	0	0	0	0	0	0	21
osa-miR6245b-3p	GTATAGGTGTCGGTTCTATTA	0	0.137002	0.0828269	0	0	0	0	0.0650675	0	0	0	0	0	0	0.0749644	0	0	0	0	0	0	0	0	0	0	0	0	0	0	0	0	0.0663988	0.251653	0.0723029	0	0.0703186	0.0987943	0.0612032	0.0649477	0	0.138777	0	0.0749571	0	0	21
osa-miR6245b-5p	TTTAATAGAACCGACACCTAT	0	0	0	0	0.19098	0.148834	0.0733744	0.130135	0.146378	0	0	0	0.0698962	0	0.299857	0.0935831	0.130563	0	0	0	0.192145	0.226793	0	0	0	0.0686003	0	0	0.0846357	0	0.18293	0.132798	0	0	0	0.421912	0.296383	0.244813	0	0.198998	0.0693884	0.145568	0.224871	0.327836	0	21
osa-miR6246	TTGGGGATTTCCTGCCGGAGGAA	0.102491	0.137002	0	0.215284	0	0.22325	0.0733744	0.130135	0	0	0.129556	0.149045	0.139792	0.14801	0.0749644	0.655082	0.195845	0.24889	0	0.073826	0	0	0	0	0	0.0686003	0	0	0	0	0.365861	0.265595	0.18874	0.144606	0	0.0703186	0	0.122406	0.0649477	0.397996	0.0693884	0	0.0749571	0	0.0876617	23
osa-miR6247	TGGCTGATTGACCTAATGGCA	0.204982	0.342505	0.414135	0.0717612	0.38196	0.148834	0.366872	0.0650675	0.146378	0.500237	0.453444	0.29809	0.0698962	0.370025	0.374822	0.187166	0	0	0	0	0	0	0	0	0	0	0	0.0805161	0	0.170838	0	0	0	0.0723029	0	0.0703186	0	0	0	0	0	0	0.0749571	0	0	21
osa-miR6248	TATTTGAGGATGGAGGTAGTA	0.307473	0.411006	0.165654	0.0717612	0.38196	0.297667	0	0.26027	0.0731891	0.300142	0.259111	0.447135	0.139792	0	0.224893	0.467916	0.39169	0.663706	0	0.073826	0.576435	0.226793	0	0	0.332148	0.274401	0.06281	0	0	0.0854192	0	0.331994	0.503307	0.144606	0.0694163	0	0.0987943	0	0.194843	0.397996	0.41633	0.0727842	0	0.245877	0.262985	21
osa-miR6249a>osa-miR6249b	CGTGAAGAGCTCGCCGGCGGC	0	0	0	0	0.28647	0	0.0733744	0.130135	0	0.100047	0	0	0.139792	0.740049	0.299857	0	0.0652816	0.24889	0	0	0.192145	0	0.107138	0	0	0	0	0	0	0	0	0	0	0	0.138833	0	0.197589	0.122406	0.129895	0.265331	0.0693884	0	0	0.163918	0	21
osa-miR6250	GGGGATAGATCGACGCGTCAAG	0	0	0	0.0717612	0	0	0	0	0.0731891	0	0	0	0	0	0.149929	0	0.130563	0.0829633	0	0	0	0	0.107138	0	0	0.0686003	0	0	0	0	0	0	0	0	0	0	0	0	0	0	0	0	0	0	0	22
osa-miR6251	TGTGTAGCCACATTGTAAGGG	6.04698	5.68558	6.54333	1.21994	6.5888	3.79526	2.93498	4.09925	2.04929	6.60313	3.30367	4.62039	4.26367	4.07027	5.92219	2.15241	2.41542	2.57186	0.853218	1.40269	0.960725	1.81435	1.17851	1.8111	2.54646	2.33241	2.13554	0.885677	1.10026	1.7938	4.39033	5.5775	4.02646	2.16909	2.36015	3.30497	3.16142	2.69294	3.05254	3.05131	3.67758	3.78478	3.22315	4.09795	3.85711	21
osa-miR6252	ATTCGTTGTATTAAGAGAGGGTT	0	0.068501	0	0	0	0.0744168	0.0733744	0	0	0	0	0	0	0	0	0	0	0	0	0	0	0	0	0	0.110716	0	0.06281	0	0	0	0	0	0.314567	0.0723029	0	0.0703186	0.0987943	0	0	0.132665	0	0	0	0	0.175323	23
osa-miR6253	GAGGAAAGTGGGCAGTTGGGTT	0	0	0	0.645851	0	0	0	0	0	0	0	0	0	0	0	0	0	0	0	0	0	0	0	0	0	0	0	0	0	0	0	0	0	0	0	0	0	0.0612032	0	0	0	0	0	0	0	22
osa-miR6254	TGCTCCGGATATTATGGCATG	0.204982	0.548008	0.579789	0.0717612	0.572939	0.595334	0.586995	0.715743	0.512324	1.20057	0.971667	0.223567	0.629066	0.518035	0.674679	0.935831	0.979225	0.995559	0.0775653	0.073826	0.38429	0	0.321413	0.417945	0.221432	0.617402	0.25124	0.40258	0.169271	0.0854192	0.548791	1.52717	1.25827	0.0723029	0.555331	0.773505	0.493971	0.18361	0.259791	0.596994	0.208165	0.509489	0.299828	0.327836	0.0876617	21
osa-miR6255	TGGGAAAAATGGGCAGTTGAGT	0	0	0	0.645851	0	0	0	0.0650675	0.0731891	0	0	0	0	0	0	0	0	0	0.0775653	0	0	0	0	0.139315	0	0.0686003	0	0	0	0	0	0.0663988	0	0	0	0	0	0	0	0.0663327	0	0	0	0.081959	0	22
osa-miR6256	GTAGTACTCGGTTGTAGGTGTA	0.102491	0	0	0	0.0954899	0	0	0	0.0731891	0	0	0.149045	0	0	0	0	0	0	0	0	0	0	0	0	0	0	0	0	0	0	0	0	0	0	0	0	0	0.122406	0	0	0	0	0	0.081959	0	22
osa-miR7692-3p	TGACTTGGCATGCTTACGTGGCAC	0	0.068501	0	0	0.0954899	0.0744168	0.0733744	0.0650675	0.0731891	0.100047	0.0647778	0.149045	0	0.0740049	0	0	0.0652816	0	0	0	0	0	0	0	0	0.137201	0	0	0	0	0	0.0663988	0	0.0723029	0.138833	0.210956	0	0	0.0649477	0.198998	0.138777	0.145568	0	0.081959	0	24
osa-miR7692-5p	GATCCAAAAAAGTGCCACGTGAGC	0	0	0.165654	0	0.0954899	0.0744168	0	0	0.219567	0.100047	0.259111	0.149045	0.0698962	0.14801	0.0749644	0	0	0.0829633	0	0	0	0	0	0	0.221432	0.0686003	0.06281	0	0	0	0	0	0	0	0	0	0	0	0.0649477	0.0663327	0	0	0	0	0.175323	24
osa-miR7693-3p	GACGTCCATCGATGAAGAGCGA	0	0.137002	0	0	0	0	0.146749	0	0	0	0	0	0.0698962	0	0	0	0	0	0	0	0	0	0	0	0	0	0	0	0	0	0	0	0	0	0	0	0	0	0	0	0	0.0727842	0	0	0	22
osa-miR7693-5p	GTTTCCGCTCTTCATCGATGGCTG	0.204982	0.753511	0.579789	0.0717612	0.47745	0.372084	0.220123	0.585608	0.439135	1.10052	0.194333	0	0.629066	0.59204	0.599715	0.0935831	0.39169	0.24889	0.310261	0.073826	0	0.226793	0.214275	0.139315	0.553579	0.343001	0.12562	0	0.59245	0.597935	0.274396	0.531191	0.18874	0.361515	0.138833	0.210956	0.197589	0.244813	0.519582	0.464329	0.485719	0.218353	0.374785	0.737631	0.701293	24
osa-miR7694-3p	CCATATTCGTAGTGCTAGGTGG	0.512456	0.068501	0.331308	0	0	0	0.146749	0	0.0731891	0.100047	0	0.0745225	0	0.0740049	0.0749644	0.467916	0.261127	0.0829633	0.0775653	0	0	0.226793	0	0.139315	0	0	0.18843	0	0.0846357	0	0.365861	0.132798	0.0629134	0.0723029	0	0.0703186	0.197589	0.0612032	0.0649477	0.265331	0.138777	0	0.374785	0.081959	0.175323	22
osa-miR7694-5p	AACCTAGTACTGGATTAGTCACCA	0.307473	0.274004	0.248481	0	0.19098	0.0744168	0.146749	0	0	0	0.129556	0.447135	0.0698962	0.29602	0.0749644	0.187166	0.326408	0	0	0.073826	0	0.226793	0	0	0	0.0686003	0.06281	0.161032	0	0	0	0	0.0629134	0	0.0694163	0.210956	0.0987943	0.0612032	0	0.0663327	0	0	0.0749571	0	0	24
osa-miR7695-3p	ACGTGATGTGCCACGTAGGCA	0.819929	0.479507	0.248481	0.0717612	0.572939	0.297667	0.293498	0.325338	0.0731891	0.200095	0.194333	0.0745225	0.279585	0.0740049	0.599715	0.280749	0.130563	0.0829633	0	0	0.576435	0.226793	0.107138	0	0	0.205801	0.06281	0	0	0	0.365861	0.265595	0.0629134	0.144606	0	0.0703186	0	0.0612032	0	0	0	0.0727842	0	0.081959	0.175323	21
osa-miR7695-5p	TGCCTATGTGGCACGCCACGTGAA	1.94733	1.16452	1.73937	0.430567	1.24137	1.3395	0.807119	0.910945	0.658702	0.300142	1.29556	0.670702	0.908651	0.666044	1.27439	0.0935831	0.130563	0.165927	0.775653	1.698	1.34502	1.81435	0.749963	1.11452	0.332148	0.891804	0.75372	0.644129	0.0846357	0.256258	0.457326	0.199197	0.440394	1.15685	1.18008	1.33605	0.592766	0.612032	0.324739	0.994991	1.52654	1.01898	1.19931	0.491754	0.964278	24
osa-miR810a	TCATAAGCCCACCACATGTGG	0	0	0.0828269	0	0	0.148834	0	0.130135	0.292756	0	0.194333	0.0745225	0.349481	0	0.374822	0.187166	0.39169	0.0829633	0	0.073826	0.38429	0.226793	0.321413	0	0.221432	0.137201	0	0	0	0	0	0.265595	0.125827	0.0723029	0.138833	0.0703186	0.0987943	0.0612032	0.129895	0.198998	0.208165	0.145568	0	0.081959	0	21
osa-miR810b.1	TGAACACCGATATGCGTCATC	14.1438	14.7277	14.3291	3.01397	12.7956	6.02776	5.28296	8.52384	5.12324	13.2063	8.42111	12.0726	14.3986	7.4745	13.2687	4.02407	3.13352	4.31409	2.0167	2.95304	7.49366	7.48417	4.82119	4.45808	8.30369	6.44843	3.39174	2.496	3.30079	3.33135	7.68308	9.03024	6.29134	5.92884	5.55331	6.68027	11.2625	13.4035	11.236	6.43427	9.15927	6.84171	10.5689	15.1624	11.922	21
osa-miR810b.2	AAGTGATTTAATTATGCCGTT	1.22989	0.822012	0.662615	0.0717612	0.763919	0.148834	1.24737	0.78081	0.512324	0.200095	0.259111	0.447135	0.768859	0.29602	1.79914	0.280749	0.522253	0.49778	0.387827	0.516782	0.38429	0	0.857101	0.975206	0.442863	0.411602	0.37686	0.161032	0	0.170838	0.18293	0.331994	0.56622	0.144606	0.208249	0.210956	0.296383	0.367219	0.259791	0.464329	0.208165	0.291137	0.224871	0.081959	0.262985	21
osa-miR812a>osa-miR812b>osa-miR812c>osa-miR812d>osa-miR812e	GACGGACGGTTAAACGTTGGAC	0.102491	0.068501	0.0828269	0	0	0	0	0.0650675	0	0	0	0.0745225	0.0698962	0.14801	0	0	0.130563	0.49778	0.0775653	0	0.192145	0	0.107138	0	0	0.137201	0	0	0	0	0	0.0663988	0.0629134	0.0723029	0	0.140637	0	0.244813	0.194843	0	0	0.145568	0.0749571	0.081959	0.0876617	22
osa-miR812f	ACGGATGATTAAAGTTGGACACGG	4.71459	3.21955	4.63831	1.2917	7.44821	3.42317	3.88884	4.16432	3.58627	6.00284	4.27533	5.2911	4.82284	2.59017	3.3734	6.92515	6.72401	5.30965	1.86157	3.91278	4.41934	4.76266	5.99971	4.31877	4.76078	7.75183	2.19835	2.25445	4.06251	4.0147	4.39033	5.24551	6.16551	2.24139	2.22132	2.03924	3.55659	2.44813	2.9876	6.6996	4.85719	4.36705	4.27255	3.44228	3.33114	24
osa-miR812g>osa-miR812h>osa-miR812i>osa-miR812j	AAGACGGATGATTAAAGTTGGACA	4.30463	10.5492	11.2645	3.73158	8.30762	8.4091	6.75045	6.63689	7.90442	8.80417	6.15389	7.9739	6.50035	6.29042	4.87268	4.58557	5.6795	6.13928	1.08591	2.36243	3.8429	5.66983	4.82119	2.64699	5.31436	5.55662	2.38678	2.09342	2.45444	2.30632	3.75007	7.37027	7.10921	2.6029	4.02615	2.53147	5.53248	4.46783	3.96181	8.02626	4.99596	5.82274	3.22315	3.93403	4.55841	24
osa-miR812k>osa-miR812l>osa-miR812m	ACGAACGGTTAAAGTTGGACGCGG	0.102491	0.205503	0.165654	0.0717612	0.19098	0.0744168	0.146749	0.195203	0	0.100047	0	0.223567	0.279585	0.29602	0.0749644	0	0.456971	0.24889	0	0.295304	0.38429	0.226793	0.107138	0.55726	0.110716	0.137201	0.06281	0	0.0846357	0.0854192	0.274396	0.132798	0.18874	0.216909	0.0694163	0.0703186	0.0987943	0.18361	0.0649477	0.530662	0.485719	0.0727842	0.149914	0.245877	0.175323	24
osa-miR812n-3p>osa-miR812t>osa-miR812u	ACGGAAAATCATGGCTGCACTTAA	0.614947	1.09602	0.662615	0.215284	0.572939	1.04184	0.440247	1.04108	0.512324	0.700331	0.453444	0.521657	0.768859	1.11007	0.899572	2.24599	2.35014	2.40593	0.542957	0.516782	1.53716	0.226793	0.42855	1.53247	1.21787	1.1662	0.6281	0.805161	0.253907	0.512515	0.548791	1.99197	1.63575	0.50612	0.416498	0.140637	0.69156	0.489626	0.779373	2.65331	0.832661	1.52847	0.374785	0.573713	1.05194	24
osa-miR812n-5p	AAGTGCAGCCATGAGTTTCCGTGC	0.204982	0	0	0.0717612	0.0954899	0	0.0733744	0	0.0731891	0.300142	0.0647778	0.149045	0.0698962	0.0740049	0.149929	0.187166	0.130563	0.331853	0	0.221478	0	0	0.107138	0	0	0.205801	0.06281	0	0	0.0854192	0.365861	1.06238	0.75496	0.361515	0.624747	0.140637	0.296383	0.244813	0.194843	0.994991	0.208165	0.509489	0.224871	0.327836	0.262985	24
osa-miR812o-3p	GAACGGTCAAATGTTAGACACGGA	0	0.137002	0	0	0.28647	0.0744168	0	0.0650675	0	0	0.0647778	0.0745225	0	0	0	0	0	0	0	0	0	0	0	0	0	0	0	0	0	0	0.18293	0	0	0	0	0	0	0.0612032	0.0649477	0	0	0	0	0	0.0876617	24
osa-miR812o-5p	CGTGTTCAACGTTTGACTGTC	0	0.068501	0.0828269	0.0717612	0	0	0	0	0	0.200095	0.0647778	0	0	0.0740049	0.149929	0.187166	0	0	0	0	0	0	0.107138	0	0	0.137201	0	0	0	0	0.0914652	0.132798	0.0629134	0	0	0	0.0987943	0	0.0649477	0	0	0	0	0.163918	0	21
osa-miR812p	GACGGACGATTAAAGTTGGGCATG	1.1274	1.16452	1.15958	0.430567	1.14588	0.22325	0.146749	0.715743	0.80508	2.10099	0.647778	1.11784	0.419377	0.518035	0.674679	0.655082	1.17507	1.07852	0.465392	0.812086	1.53716	2.26793	0.642826	1.39315	2.87861	1.57781	0.37686	0.966193	0.761721	0.597935	13.6283	22.0444	21.5164	11.207	9.71828	19.3376	12.4481	12.363	13.1194	17.5782	21.0941	18.9967	14.2418	14.8346	8.76617	24
osa-miR812q	ACGTTGGGTACGAATATCTACGGC	0	0.068501	0	0	0	0	0	0	0	0	0	0.149045	0	0	0	0	0	0.165927	0	0	0	0	0	0	0	0	0	0	0	0	0.457326	0.132798	0.0629134	0	0	0.140637	0	0.18361	0	0.331664	0.208165	0	0.299828	0.081959	0.175323	24
osa-miR812r	ACGTTAGACACGAATTTCTACGGC	0.307473	0.548008	0.414135	0.0717612	0	0.297667	0.146749	0.26027	0.219567	0.800379	0.259111	0.372612	0.698962	0.666044	0.299857	0.187166	0.326408	0.414816	0.155131	0.221478	0.576435	0.226793	0.321413	0.417945	0.221432	0.205801	0.25124	0	0.0846357	0.170838	0.457326	1.12878	0.18874	0.50612	0.0694163	0.421912	0.197589	0.367219	0.0649477	0.198998	0.277554	0.291137	0.299828	0	0.175323	24
osa-miR812s	AAGACGGACAATCAAACGTTGGAC	0.204982	0.411006	0.331308	0	0.28647	0.0744168	0.220123	0.130135	0.0731891	0	0.0647778	0	0.349481	0.0740049	0.0749644	0.374332	0.326408	0.0829633	0.155131	0.073826	0.192145	0.226793	0	0	0.332148	0.274401	0	0	0.169271	0.170838	0.0914652	0.132798	0.125827	0	0	0.0703186	0.197589	0.18361	0.129895	0.132665	0.0693884	0.218353	0.149914	0.409795	0.175323	24
osa-miR814a>osa-miR814b>osa-miR814c	CACTTCATAGTACAACGAATCT	0.307473	0.68501	0.165654	0.0717612	0.47745	0.148834	0	0.52054	0.0731891	0.400189	0.129556	0	0.698962	0.0740049	0.824608	0.561499	0.130563	0.49778	0.155131	0.147652	1.15287	0.680379	0	0	0.221432	0.343001	0.12562	0.161032	0	0	0.274396	0	0.251653	0.0723029	0.0694163	0	0.395177	0.306016	0.389686	0.265331	0.277554	0.145568	0.299828	0.163918	0.350647	22
osa-miR815a>osa-miR815b>osa-miR815c	AAGGGGATTGAGGAGATTGGG	0.102491	0	0.165654	0	0	0	0	0.325338	0	0.200095	0.0647778	0.0745225	0.209689	0	0.149929	0.187166	0.195845	0.165927	0.0775653	0.147652	0.192145	0	0.107138	0	0.110716	0.274401	0.18843	0.0805161	0	0	0	0.199197	0.251653	0	0.0694163	0.140637	0.0987943	0.18361	0	0.0663327	0.138777	0.291137	0	0.081959	0.175323	21
osa-miR817	TCCAACTTGAGGCCCGATTGA	0	0	0	0	0.19098	0.0744168	0	0	0	0	0	0	0	0	0.0749644	0	0	0	0	0	0	0	0	0	0	0	0	0	0	0	0	0	0	0	0	0	0.197589	0	0	0	0	0	0	0	0	21
osa-miR820a>osa-miR820b>osa-miR820c	TCGGCCTCGTGGATGGACCAG	74.8185	74.1866	74.9584	11.1947	86.4184	33.1899	36.3203	52.1191	34.7648	89.9426	46.5104	68.4861	67.1004	47.9552	72.2657	90.4013	78.0768	78.1514	17.4522	33.2955	81.4695	83.2331	47.1405	56.4226	87.9084	104.753	26.5686	21.2562	23.5287	25.5404	31.647	59.4934	57.5657	26.3906	33.3893	33.9639	67.9705	65.5486	66.9611	90.2125	60.7148	56.7717	57.0423	54.6666	52.4217	21
osa-miR827	TTAGATGACCATCAGCAAACA	1.33238	3.42505	2.65046	0.358806	2.8647	1.63717	2.20123	3.05817	1.24421	1.40066	1.36033	1.49045	3.14533	1.11007	3.59829	157.688	56.7297	73.3395	11.3245	58.6178	30.3589	78.4704	87.8528	98.6351	82.4833	126.225	37.686	14.976	4.23179	12.215	3.10982	8.76465	6.29134	2.6029	2.91549	2.10956	9.48425	5.07987	4.54634	6.16894	5.75924	8.80689	3.74785	3.03248	6.22398	21

## Sheet: Table S3
Table S3: miRNA invovled in PAMP-triggered immunity (PTI)
	miRNA_id	LTH_CK_6 hr			LTH_chitin_6 hr			BaseMean	lfcSE	stat	Fold Change	Fold Change (Log2)	pValue	qValue	Regulation	Sequence	Length
		repeat 1	repeat 2	repeat 3	repeat 1	repeat 2	repeat 3
chitin_6 hr vs ck_6 hr	osa-miR1320-5p	0.629066	0.222015	0.524751	1.76099	0.650675	2.41524	16.991	0.765275	3.18231	5.40894	2.43535	0.00146104	0.0763913	Up	TGGAACGGAGGAATTTTATAG	21
	osa-miR1432-5p	16.6353	5.40236	15.2927	53.49	13.0135	23.1278	327.054	0.618962	3.03318	3.67418	1.87742	0.00241993	0.0984106	Up	ATCAGGAGAGATGACACCGAC	21
	osa-miR168a-5p	423.711	319.849	403.833	529.103	351.69	740.747	6948.89	0.461249	2.33389	2.10892	1.0765	0.0196015	0.298923	Up	TCGCTTGGTGCAGATCGGGAC	21
	osa-miR169i-5p.2	5.31211	1.5541	4.198	14.0145	4.09925	12.5153	110.86	0.631586	3.34793	4.33042	2.11451	0.000814174	0.0744969	Up	TGGTGATAAGGGTGTAGCTCTG	22
	osa-miR1865-5p	1.11834	0.814054	1.19943	2.20123	1.62669	2.12248	22.8645	0.525041	2.76385	2.73423	1.45114	0.00571229	0.174225	Up	TGCTAGTGATGGTGATTCTTCGAC	24
	osa-miR2873a	34.7384	19.9073	41.98	78.7308	24.9209	54.5991	642.85	0.538397	2.44522	2.49061	1.3165	0.0144764	0.298923	Up	AAGTTTGGACTTAAATTTGGTAAC	24
	osa-miR2877	7.26921	7.32649	10.495	19.004	6.11635	21.0053	185.776	0.583044	2.53582	2.78658	1.47849	0.0112185	0.273731	Up	TTGCATCCTCTGCACTTTGGGCCT	24
	osa-miR395b>osa-miR395d>osa-miR395e>osa-miR395g>osa-miR395h>osa-miR395i>osa-miR395j>osa-miR395k>osa-miR395l>osa-miR395s>osa-miR395m>osa-miR395n>osa-miR395p>osa-miR395q>osa-miR395r>osa-miR395y	0.349481	0.888059	0.449786	0.880493	1.69176	1.02465	13.0687	0.670472	2.21369	2.79765	1.48421	0.0268503	0.377969	Up	GTGAAGTGTTTGGGGGAACTC	21
	osa-miR398b	51.6533	29.676	52.7	108.741	65.8483	165.481	1255.23	0.507638	3.85988	3.88906	1.95942	0.000113443	0.0207602	Up	TGTGTTCTCAGGTCGCCCCTG	21
	osa-miR5814	6.08097	6.58644	8.92076	14.6749	6.37662	10.1733	131.56	0.489355	2.19368	2.10452	1.07349	0.0282582	0.383056	Up	AATCAAGTTAGGAACCATGCAAGT	24
	osa-miR166g-5p	2.02699	2.59017	1.19943	0.0733744	0.585608	0.219567	14.0924	0.775394	-3.04962	0.194164	-2.36466	0.00229134	0.0984106	Down	AATGGAGGCTGATCCAAGATC	21
	osa-miR2871a-3p>osa-miR2871b-3p	10.135	5.77239	16.6421	1.98111	6.44168	3.14713	91.3436	0.496	-2.07856	0.489383	-1.03096	0.0376581	0.430714	Down	TATTTTAGTTTCTATGGTCAC	21
	osa-miR396e-5p	5785.94	4433.71	6374	1970.32	2250.56	1584.03	47909.3	0.262752	-3.94014	0.487921	-1.03528	8.14e-05	0.0207602	Down	TCCACAGGCTTTCTTGAACTG	21

## Sheet: Table S4
Table S4: miRNA invovled in effector-triggered susceptibility (ETS)
	miRNA_id	LTH_melo_12 hr			LTH_Guy11_12 hr			BaseMean	lfcSE	stat	Fold Change	Fold Change (Log2)	pValue	qValue	Regulation	Sequence	Length
		repeat 1	repeat 2	repeat 3	repeat 1	repeat 2	repeat 3
Guy11_12 hr vs moelo_12 hr	osa-miR164d	2.32503	6.03682	1.75868	12.0226	2.21478	29.3982	94.3735	0.619222	4.01919	5.613	2.48877	5.83984e-05	0.00946055	Up	TGGAGAAGCAGGGCACGTGCT	21
	osa-miR1861b>osa-miR1861f>osa-miR1861i>osa-miR1861l	2.32503	0.480202	1.19339	2.24939	1.47652	5.9565	24.7608	0.680501	2.32337	2.99189	1.58106	0.0201591	0.753639	Up	CGATCTTGAGGCAGGAACTGAG	22
	osa-miR398a	0.110716	1.30341	0.75372	3.18018	0.147652	15.5637	33.2127	0.914585	3.3565	8.3966	3.06981	0.000789353	0.0767251	Up	TGTGTTCTCAGGTCACCCCTT	21
	osa-miR398b	86.0262	81.7715	30.7769	412.88	64.3024	195.988	1986.98	0.603265	4.38001	6.2433	2.64231	1.18673e-05	0.00576749	Up	TGTGTTCTCAGGTCGCCCCTG	21
	osa-miR408-3p	338.569	322.627	94.7175	1332.96	137.759	984.359	6790.54	0.621163	4.03918	5.69221	2.50899	5.3638e-05	0.00946055	Up	CTGCACTGCCTCTTCCCTGGC	21
	osa-miR528-3p	20.9253	22.7067	6.34381	38.4724	2.65773	46.8834	253.194	0.658986	2.22798	2.76678	1.46821	0.0258818	0.798631	Up	CCTGTGCTTGCCTCTTCCATT	21
	osa-miR528-5p	66.8724	91.3756	14.3835	202.678	26.2082	123.165	1081.42	0.637592	3.06401	3.87338	1.95359	0.0021839	0.151625	Up	TGGAAGGGGCATGCAGAGGAG	21
	osa-miR1882e-3p	0.221432	5.07642	6.40662	0	0.073826	0	22.3249	2.05454	-3.16564	0.0110183	-6.50395	0.00154741	0.12534	Down	GAAATGATCTTGGACGTAATCTAG	24
	osa-miR399d	36.0934	45.6878	14.2579	4.65392	11.0001	10.568	189.264	0.451266	-2.63727	0.438269	-1.19011	0.00835766	0.507728	Down	TGCCAAAGGAGAGTTGCCCTG	21
	osa-miR399j	23.2503	16.3269	5.15042	1.24104	3.91278	8.07009	84.0679	0.516211	-2.47035	0.413162	-1.27522	0.0134981	0.656009	Down	TGCCAAAGGAGAGTTGCCCTA	21
	miRNA_id	LTH_melo_24 hr			LTH_Guy11_24 hr			BaseMean	lfcSE	stat	Fold Change	Fold Change (Log2)	pValue	qValue	Regulation	Sequence	Length
		repeat 1	repeat 2	repeat 3	repeat 1	repeat 2	repeat 3
Guy11_24 hr vs moelo_24 hr	osa-miR11340-5p	0.40258	0.338543	0.768773	2.49472	1.92848	1.53247	9.57825	0.637277	2.16171	2.59837	1.37761	0.0306404	0.210451	Up	ATCCGATCTACGATCCGATTACAC	24
	osa-miR11342-3p	1.44929	0.253907	0.427096	4.30907	3.4284	2.22904	15.5455	0.778302	1.9998	2.94128	1.55645	0.0455223	0.232967	Up	CTCGTTAGATTCGTCTCGCAAA	22
	osa-miR1437b-5p	1.28826	1.10026	1.11045	6.577	2.78558	3.48288	20.3662	0.441283	2.62654	2.2331	1.15905	0.00862576	0.0978836	Up	GGGAGGAAACAGTGCCTAGTG	21
	osa-miR169r-3p	1.20774	0.338543	0.854192	6.577	1.7142	3.34356	16.6214	0.646804	2.30865	2.81521	1.49324	0.0209632	0.1658	Up	TGGCAAGTCTCCTCGGCTACC	21
	osa-miR171b>osa-miR171c-3p>osa-miR171d-3p>osa-miR171e-3p>osa-miR171f-3p	3.54271	5.41669	4.10012	26.308	11.0352	10.17	74.76	0.373802	3.04622	2.2018	1.13868	0.00231739	0.0403225	Up	TGATTGAGCCGTGCCAATATC	21
	osa-miR172a>osa-miR172d-3p	0.966193	0.59245	1.02503	7.93776	2.78558	4.04014	20.5243	0.494299	3.59573	3.428	1.77737	0.000323483	0.00938101	Up	AGAATCTTGATGATGCTGCAT	21
	osa-miR1883a>osa-miR1883b	1.04671	0.59245	0.768773	3.1751	2.67844	2.08973	13.6798	0.55671	1.98677	2.15256	1.10605	0.0469483	0.235644	Up	ACCTGTGACGGGCCGAGAATGGAA	24
	osa-miR2876-3p	2.0129	1.52344	3.07509	10.2057	4.92833	7.10507	36.5732	0.393014	2.75522	2.1182	1.08284	0.00586531	0.0721332	Up	TTCCTATATGAACACTGTTGC	21
	osa-miR396e-5p	335.591	365.203	549.246	3841.2	1863.23	623.853	9028.54	0.564153	2.87886	3.08253	1.62411	0.00399119	0.061566	Up	TCCACAGGCTTTCTTGAACTG	21
	osa-miR397b	0.40258	0.846357	1.02503	9.29852	0.964238	2.7863	16.7027	0.765411	2.17132	3.16444	1.66195	0.0299072	0.210451	Up	TTATTGAGTGCAGCGTTGATG	21
	osa-miR408-5p	2.09342	4.82424	2.648	26.7616	3.74982	11.9811	60.079	0.621997	2.13973	2.5156	1.3309	0.0323768	0.216676	Up	CAGGGATGAGGCAGAGCATGG	21
	osa-miR5144-5p	8.21264	5.9245	7.34605	26.9884	24.3202	25.216	129.537	0.343434	3.59896	2.35546	1.23601	0.000319488	0.00938101	Up	TTCTTGTGCTGCTGAAGAGAC	21
	osa-miR528-3p	3.30116	4.40106	3.33135	51.2553	3.85695	10.7273	81.8686	0.732075	2.2525	3.13616	1.649	0.0242906	0.186466	Up	CCTGTGCTTGCCTCTTCCATT	21
	osa-miR5504	0.724645	0.507814	0.597935	3.1751	5.35688	8.91617	25.1944	0.687033	3.98117	6.6585	2.7352	6.85758e-05	0.00298305	Up	AGTGACGGGAGGACTGCAAGG	21
	osa-miR5542	0.483097	0.253907	1.28129	4.98945	2.14275	1.8111	13.188	0.697992	2.08143	2.73743	1.45282	0.0373942	0.228075	Up	TTTGAGAAGGTATCATGAGAT	21
	osa-miR5788	1.85187	2.28516	2.39174	9.07173	6.42826	8.21959	39.2152	0.351527	3.54872	2.37425	1.24747	0.000387114	0.00973186	Up	TGGATGTGACATACTCTAGTA	21
	osa-miR827	14.976	4.23179	12.215	78.4704	87.8528	98.6351	378.567	0.569243	4.40009	5.67541	2.50472	1.08204e-05	0.000706029	Up	TTAGATGACCATCAGCAAACA	21
	osa-miR1862e	86.9574	109.011	130.606	84.3671	62.9969	55.5867	814.888	0.262563	-4.94783	0.406374	-1.29912	7.50461e-07	9.79352e-05	Down	CTAGATTTGTTTATTTTGGGACGG	24
	osa-miR1882e-3p	7.40748	5.83986	8.79818	0	0	0.139315	39.5065	1.24269	-6.20345	0.00477935	-7.70897	5.52395e-10	1.44175e-07	Down	GAAATGATCTTGGACGTAATCTAG	24
	osa-miR2877	2.25445	3.04689	2.648	2.72152	1.07138	1.53247	20.0106	0.452491	-2.86152	0.40759	-1.29481	0.00421616	0.061566	Down	TTGCATCCTCTGCACTTTGGGCCT	24
	osa-miR5150-5p	5.79716	5.24741	7.94399	6.35021	4.60692	2.92562	49.6934	0.39351	-2.74343	0.473171	-1.07956	0.00608019	0.0721332	Down	AGCTTCTGACAGCTGCAGTTTCTC	24
	osa-miR5814	7.72954	7.53258	6.2356	6.35021	4.07123	5.5726	57.1886	0.338074	-3.16164	0.476693	-1.06887	0.00156885	0.0314977	Down	AATCAAGTTAGGAACCATGCAAGT	24

## Sheet: Table S5
Table S5: miRNA invovled in effector-triggered imminity (ETI)
	miRNA_id	Pizt_RB22_18 hr			Pizt_AvrPizt_18 hr			BaseMean	lfcSE	stat	Fold Change	Fold Change (Log2)	pValue	qValue	Regulation	Sequence	Length
		repeat 1	repeat 2	repeat 3	repeat 1	repeat 2	repeat 3
avrPizt 18 hr vs RB22 18 hr	osa-miR1319a	1.19399	1.45716	1.16455	1.51836	1.18008	1.8986	20.8018	0.489081	-2.09186	2.03227	1.02309	0.0364512	0.759642	Up	AACCGGCATCTGTAATATATTATA	24
	osa-miR166j-3p	128.299	141.129	174.853	168.335	103.176	169.96	2110.58	0.252203	-2.96502	1.67921	0.747786	0.00302666	0.262815	Up	GAATGACGTCCGGTCTGAAGA	21
	osa-miR1862e	83.8446	102.001	89.5973	95.5845	91.5601	141.762	1486.38	0.285845	-3.46677	1.98751	0.99096	0.000526749	0.137218	Up	CTAGATTTGTTTATTTTGGGACGG	24
	osa-miR1863a	5.30662	4.43984	5.82863	6.10864	3.90436	5.62549	74.9914	0.333814	-2.27301	1.69204	0.758761	0.0230258	0.705673	Up	AGCTCTGATACCATGTTAGATTAG	24
	osa-miR1882e-3p	1423.23	1959.21	2113.78	2071.7	1785.67	2836.79	30222	0.331821	-3.04278	2.01343	1.00966	0.00234405	0.24425	Up	GAAATGATCTTGGACGTAATCTAG	24
	osa-miR398b	63.1488	79.5885	117.11	102.815	87.1175	94.2973	1348.51	0.373415	-2.33398	1.82962	0.871544	0.0195968	0.680661	Up	TGTGTTCTCAGGTCGCCCCTG	21
	osa-miR1425-3p	8.42426	6.45312	8.00626	1.80757	1.73541	2.53147	59.1291	0.351456	3.28475	0.449239	-1.15444	0.00102074	0.177269	Down	CAGCAAGAACTGGATCTTAAT	21
	osa-miR393b-5p	9.55191	3.81636	5.82274	2.386	1.59658	0.632868	48.0223	0.569097	2.0942	0.437754	-1.19181	0.0362418	0.759642	Down	TCCAAAGGGATCGCATTGATCT	22
	osa-miR396a-5p>osa-miR396b-5p	113.164	113.936	126.572	52.7088	28.9466	44.582	1026.76	0.3492	2.03723	0.610726	-0.711402	0.0416267	0.807392	Down	TTCCACAGCTTTCTTGAACTG	21
	osa-miR397b	2.25531	2.9837	1.89239	0.795332	0.138833	0.140637	16.3742	0.767034	2.49302	0.265682	-1.91223	0.0126662	0.549926	Down	TTATTGAGTGCAGCGTTGATG	21
	osa-miR408-5p	50.4792	84.0293	227.014	29.7888	12.0784	28.1274	894.572	0.609125	2.72472	0.316506	-1.65969	0.00643561	0.337706	Down	CAGGGATGAGGCAGAGCATGG	21
	osa-miR444a-3p.2>osa-miR444d.2>osa-miR444e	26.0688	20.2614	20.7435	7.3749	8.53821	6.53963	187.879	0.285472	2.77823	0.5771	-0.793107	0.00546562	0.337706	Down	TGCAGTTGCTGCCTCAAGCTT	21
	miRNA_id	Pizt_RB22_42 hr			Pizt_AvrPizt_42 hr			BaseMean	lfcSE	stat	Fold Change	Fold Change (Log2)	pValue	qValue	Regulation	Sequence	Length
		repeat 1	repeat 2	repeat 3	repeat 1	repeat 2	repeat 3
avrPizt 42 hr vs RB22 42 hr	osa-miR169f.1>osa-miR169g	0	0.409795	0	1.97589	2.44813	2.33812	15.5679	0.847898	-4.83929	17.1868	4.10323	1.30301e-06	0.000674961	Up	TAGCCAAGGATGACTTGCCTA	21
	osa-miR169e	1.79897	1.31134	2.10388	0.0987943	0	0	11.1479	1.30815	4.58743	0.0156137	-6.00104	4.48734e-06	0.00116222	Down	TAGCCAAGGATGACTTGCCGG	21

## Sheet: Table S6
	PTI															ETS															ETI
	LTH_0 hr			LTH_chitin_3hr			LTH_chitin_6 hr			LTH_CK_3 hr			LTH_CK_6 hr			LTH2_0 hr			LTH_Guy11_12 hr			LTH_Guy11_24 hr			LTH_melo_12 hr			LTH_melo_24 hr			Pizt_0 hr			Pizt_AvrPzit_18 hr			Pizt_AvrPizt_42 hr			Pizt_RB22_18 hr			Pizt_RB22_42 hr
miRNA_id	repeat1	repeat2	repeat3	repeat1	repeat2	repeat3	repeat1	repeat2	repeat3	repeat1	repeat2	repeat3	repeat1	repeat2	repeat3	repeat1	repeat2	repeat3	repeat1	repeat2	repeat3	repeat1	repeat2	repeat3	repeat1	repeat2	repeat3	repeat1	repeat2	repeat3	repeat1	repeat2	repeat3	repeat1	repeat2	repeat3	repeat1	repeat2	repeat3	repeat1	repeat2	repeat3	repeat1	repeat2	repeat3	Sequence	Length
1 common element in "PTI", "ETS" and "ETI":
osa-miR398b	108.026	168.855	154.969	60.7817	245.218	154.34	108.741	65.8483	165.481	160.576	109.993	147.331	51.6533	29.676	52.7	44.9199	88.5872	104.202	412.88	64.3024	195.988	860	52.176	73.5584	86.0262	81.7715	30.7769	59.9845	62.1226	64.8332	40.0618	38.1129	52.3439	102.815	87.1175	94.2973	155.799	174.123	175.359	63.1488	79.5885	117.11	204.333	246.287	139.47	TGTGTTCTCAGGTCGCCCCTG	21
3 common elements in "PTI" and "ETS":
osa-miR2877	8.50676	16.5772	11.5958	2.36812	13.5596	17.1159	19.004	6.11635	21.0053	19.5092	13.9272	19.7485	7.26921	7.32649	10.495	2.33958	3.39464	2.07408	0.775653	1.18122	2.1136	2.72152	1.07138	1.53247	2.98933	3.63581	2.76364	2.25445	3.04689	2.648	4.66473	6.63988	5.03307	3.18133	4.85914	6.18804	4.05056	7.28318	4.2216	7.2966	5.82863	5.24046	6.67118	6.88455	5.2597	TTGCATCCTCTGCACTTTGGGCCT	24
osa-miR5814	8.0968	8.97363	10.3534	2.08107	10.4084	11.1625	14.6749	6.37662	10.1733	13.6064	9.58711	15.0535	6.08097	6.58644	8.92076	18.5295	13.5133	14.9334	3.64557	6.93964	4.80363	6.35021	4.07123	5.5726	6.20009	18.7965	7.85125	7.72954	7.53258	6.2356	12.0734	18.7909	20.9501	6.65187	4.92856	9.70397	9.28666	6.85476	5.32571	20.0325	12.4899	18.0505	8.91989	11.8021	8.06487	AATCAAGTTAGGAACCATGCAAGT	24
osa-miR396e-5p	1817.47	3139.4	5228.78	1080.08	3537.23	2190.09	1970.32	2250.56	1584.03	4215.4	2763.23	2114.8	5785.94	4433.71	6374	2260.87	1676.11	7538.21	1354.14	467.687	3825.22	3841.2	1863.23	623.853	4721.81	1263.34	560.768	335.591	365.203	549.246	1060.54	5748.74	5208.47	803.213	1871.6	1898.11	2929.94	953.73	919.855	5451.62	1514.75	1417.11	1039.43	2597.61	1007.14	TCCACAGGCTTTCTTGAACTG	21
4 common elements in "ETS" and "ETI":
osa-miR1882e-3p	0.204982	0.548008	0.248481	0.0717612	0.0954899	0.0744168	0	0	0.219567	0	0	0	0.0698962	0.0740049	0.299857	0	0.0652816	0	0	0.073826	0	0	0	0.139315	0.221432	5.07642	6.40662	7.40748	5.83986	8.79818	1990.74	1624.25	911.048	2071.7	1785.67	2836.79	3188.39	3072.46	2705.66	1423.23	2113.78	1959.21	3467.89	3682.66	3075.96	GAAATGATCTTGGACGTAATCTAG	24
osa-miR397b	0.409964	0.959014	0.496962	0.143522	0.668429	0.22325	0.146749	0.130135	0.292756	0.500237	0.129556	0	0.0698962	0	0.299857	11.1364	10.9673	14.8504	1.86157	0.516782	3.26647	9.29852	0.964238	2.7863	2.32503	1.30341	0.37686	0.40258	0.846357	1.02503	2.56103	0.59759	15.98	0.795332	0.138833	0.140637	1.38312	1.8361	1.88348	2.25531	2.9837	1.89239	3.59794	4.26187	0.701293	TTATTGAGTGCAGCGTTGATG	21
osa-miR408-5p	0.204982	0.890513	0.414135	0.143522	0.28647	0.148834	0.293498	0.195203	0.219567	0.300142	0.0647778	0.89427	0.629066	0.14801	0.524751	94.8933	25.5904	26.7971	20.5548	4.06043	30.5511	26.7616	3.74982	11.9811	21.811	22.7067	6.59505	2.09342	4.82424	2.648	11.2502	29.4811	90.7211	29.7888	12.0784	28.1274	26.0817	20.3807	22.2771	50.4792	84.0293	227.014	40.4019	37.1274	22.4414	CAGGGATGAGGCAGAGCATGG	21
osa-miR1862e	73.0762	163.58	159.028	43.7026	185.25	262.989	247.492	198.456	284.193	164.678	153.135	255.239	194.871	218.907	182.463	62.4199	60.0591	56.3321	70.1966	95.3831	108.754	84.3671	62.9969	55.5867	114.591	104.135	97.1043	86.9574	109.011	130.606	123.021	96.6767	62.5359	95.5845	91.5601	141.762	86.7414	102.577	98.4607	83.8446	102.001	89.5973	168.204	123.922	115.363	CTAGATTTGTTTATTTTGGGACGG	24

## Sheet: Table S7
Table S7: The predicted target genes of miRNAs invovled in PTI
miRNA_id	Transcript	Target_start	Target_end	Score	product	gene	GO_id	GO_term	pahtway	pathway_description
osa-miR168a-5p	LOC_Os11g40284.1	2325	2344	3.5	retrotransposon protein, putative, unclassified, expressed	LOC_Os11g40284	NA	NA	NA	NA
osa-miR168a-5p	LOC_Os09g02700.1	2381	2401	4	polyadenylate-binding protein, putative, expressed	LOC_Os09g02700	GO:0006412,GO:0008150,GO:0008135,GO:0003723,GO:0005829	translation|biological_process|translation factor activity, nucleic acid binding|RNA binding|cytosol	path:osa03018,path:osa03013,path:osa03015	RNA degradation |RNA transport |mRNA surveillance pathway
osa-miR168a-5p	LOC_Os05g49710.1	3373	3392	4	retrotransposon protein, putative, unclassified, expressed	LOC_Os05g49710	NA	NA	NA	NA
osa-miR168a-5p	LOC_Os03g03260.1	1769	1788	4	homeobox domain containing protein, expressed	LOC_Os03g03260	GO:0003677,GO:0005515,GO:0009058,GO:0006139,GO:0009653,GO:0007275,GO:0003700	DNA binding|protein binding|biosynthetic process|nucleobase, nucleoside, nucleotide and nucleic acid metabolic process|anatomical structure morphogenesis|multicellular organismal development|sequence-specific DNA binding transcription factor activity	NA	NA
osa-miR1432-5p	LOC_Os03g59790.1	45	65	1	EF hand family protein, putative, expressed	LOC_Os03g59790	GO:0005488,GO:0000003,GO:0005737	binding|reproduction|cytoplasm	NA	NA
osa-miR1432-5p	LOC_Os03g59870.1	30	50	1	EF hand family protein, putative, expressed	LOC_Os03g59870	GO:0005575,GO:0005488,GO:0008150	cellular_component|binding|biological_process	NA	NA
osa-miR1432-5p	LOC_Os03g59770.1	117	137	1	EF hand family protein, putative, expressed	LOC_Os03g59770	GO:0005575,GO:0005515,GO:0005488,GO:0008150	cellular_component|protein binding|binding|biological_process	NA	NA
osa-miR1432-5p	LOC_Os04g51610.1	147	167	3	calcium-transporting ATPase, plasma membrane-type, putative, expressed	LOC_Os04g51610	GO:0006810,GO:0009987,GO:0016020,GO:0005575,GO:0016787,GO:0005215,GO:0005515,GO:0009607,GO:0009056,GO:0006139,GO:0005886	transport|cellular process|membrane|cellular_component|hydrolase activity|transporter activity|protein binding|response to biotic stimulus|catabolic process|nucleobase, nucleoside, nucleotide and nucleic acid metabolic process|plasma membrane	NA	NA
osa-miR1432-5p	LOC_Os04g51610.3	147	167	3	calcium-transporting ATPase, plasma membrane-type, putative, expressed	LOC_Os04g51610	GO:0006810,GO:0009987,GO:0016020,GO:0005575,GO:0016787,GO:0005215,GO:0005515,GO:0009607,GO:0009056,GO:0006139,GO:0005886	transport|cellular process|membrane|cellular_component|hydrolase activity|transporter activity|protein binding|response to biotic stimulus|catabolic process|nucleobase, nucleoside, nucleotide and nucleic acid metabolic process|plasma membrane	NA	NA
osa-miR1432-5p	LOC_Os05g07210.1	1166	1186	4	metal cation transporter, putative, expressed	LOC_Os05g07210	GO:0016020,GO:0005215,GO:0006810,GO:0009987,GO:0009607	membrane|transporter activity|transport|cellular process|response to biotic stimulus	NA	NA
osa-miR2877	LOC_Os03g12950.1	620	643	3.5	AP2-like ethylene-responsive transcription factor AINTEGUMENTA, putative, expressed	LOC_Os03g12950	GO:0009653,GO:0007275,GO:0003677,GO:0005634,GO:0009058,GO:0006139,GO:0009987,GO:0000003,GO:0003700	anatomical structure morphogenesis|multicellular organismal development|DNA binding|nucleus|biosynthetic process|nucleobase, nucleoside, nucleotide and nucleic acid metabolic process|cellular process|reproduction|sequence-specific DNA binding transcription factor activity	NA	NA
osa-miR398b	LOC_Os07g46990.1	124	144	2.5	copper/zinc superoxide dismutase, putative, expressed	LOC_Os07g46990	GO:0008152,GO:0006950,GO:0009987,GO:0003824,GO:0009607,GO:0008150,GO:0005737,GO:0005829,GO:0005488,GO:0005576,GO:0009628	metabolic process|response to stress|cellular process|catalytic activity|response to biotic stimulus|biological_process|cytoplasm|cytosol|binding|extracellular region|response to abiotic stimulus	path:osa04146	Peroxisome
osa-miR398b	LOC_Os01g68770.1	134	153	3.5	selenium-binding protein, putative, expressed	LOC_Os01g68770	GO:0008152,GO:0009987,GO:0008150,GO:0005575,GO:0005829,GO:0005488,GO:0006950	metabolic process|cellular process|biological_process|cellular_component|cytosol|binding|response to stress	NA	NA
osa-miR398b	LOC_Os11g09780.1	500	520	4	expressed protein	LOC_Os11g09780	NA	NA	NA	NA
osa-miR396e-5p	LOC_Os02g45570.1	629	649	1	growth regulating factor protein, putative, expressed	LOC_Os02g45570	GO:0005634,GO:0007275	nucleus|multicellular organismal development	NA	NA
osa-miR396e-5p	LOC_Os02g45570.2	838	858	1	growth regulating factor protein, putative, expressed	LOC_Os02g45570	GO:0005634,GO:0007275	nucleus|multicellular organismal development	NA	NA
osa-miR396e-5p	LOC_Os06g10310.1	423	443	1	growth regulating factor protein, putative, expressed	LOC_Os06g10310	GO:0005634,GO:0007275	nucleus|multicellular organismal development	NA	NA
osa-miR396e-5p	LOC_Os06g02560.2	605	625	1	growth-regulating factor, putative, expressed	LOC_Os06g02560	GO:0005634,GO:0007275	nucleus|multicellular organismal development	NA	NA
osa-miR396e-5p	LOC_Os04g51190.3	535	555	1	growth-regulating factor, putative, expressed	LOC_Os04g51190	GO:0005634,GO:0007275	nucleus|multicellular organismal development	NA	NA
osa-miR396e-5p	LOC_Os04g51190.1	535	555	1	growth-regulating factor, putative, expressed	LOC_Os04g51190	GO:0005634,GO:0007275	nucleus|multicellular organismal development	NA	NA
osa-miR396e-5p	LOC_Os04g51190.2	535	555	1	growth-regulating factor, putative, expressed	LOC_Os04g51190	GO:0005634,GO:0007275	nucleus|multicellular organismal development	NA	NA
osa-miR396e-5p	LOC_Os02g47280.2	570	590	1	growth-regulating factor, putative, expressed	LOC_Os02g47280	GO:0005634,GO:0007275	nucleus|multicellular organismal development	NA	NA
osa-miR396e-5p	LOC_Os06g02560.1	605	625	1	growth-regulating factor, putative, expressed	LOC_Os06g02560	GO:0005634,GO:0007275	nucleus|multicellular organismal development	NA	NA
osa-miR396e-5p	LOC_Os06g02560.3	625	645	1	growth-regulating factor, putative, expressed	LOC_Os06g02560	GO:0005634,GO:0007275	nucleus|multicellular organismal development	NA	NA
osa-miR396e-5p	LOC_Os02g47280.1	667	687	1	growth-regulating factor, putative, expressed	LOC_Os02g47280	GO:0005634,GO:0007275	nucleus|multicellular organismal development	NA	NA
osa-miR396e-5p	LOC_Os02g53690.1	570	590	1	growth regulating factor protein, putative, expressed	LOC_Os02g53690	GO:0005634,GO:0007275	nucleus|multicellular organismal development	NA	NA
osa-miR396e-5p	LOC_Os03g47140.1	947	967	1	growth regulating factor protein, putative, expressed	LOC_Os03g47140	GO:0005634,GO:0005515,GO:0007275	nucleus|protein binding|multicellular organismal development	NA	NA
osa-miR396e-5p	LOC_Os04g24190.1	827	847	2	growth-regulating factor 11, putative, expressed	LOC_Os04g24190	NA	NA	NA	NA
osa-miR396e-5p	LOC_Os04g48510.1	858	878	3	growth regulating factor protein, putative, expressed	LOC_Os04g48510	GO:0005634,GO:0007275	nucleus|multicellular organismal development	NA	NA
osa-miR396e-5p	LOC_Os03g51970.1	419	439	3	growth-regulating factor, putative, expressed	LOC_Os03g51970	GO:0005634,GO:0005515,GO:0007275	nucleus|protein binding|multicellular organismal development	NA	NA
osa-miR396e-5p	LOC_Os12g29980.2	732	752	3	growth regulating factor protein, putative, expressed	LOC_Os12g29980	GO:0005634,GO:0007275	nucleus|multicellular organismal development	NA	NA
osa-miR396e-5p	LOC_Os12g29980.1	774	794	3	growth regulating factor protein, putative, expressed	LOC_Os12g29980	GO:0005634,GO:0007275	nucleus|multicellular organismal development	NA	NA
osa-miR396e-5p	LOC_Os11g35030.1	869	889	3.5	growth regulating factor protein, putative, expressed	LOC_Os11g35030	GO:0005634,GO:0005515,GO:0007275	nucleus|protein binding|multicellular organismal development	NA	NA
osa-miR396e-5p	LOC_Os11g35030.2	1556	1576	3.5	growth regulating factor protein, putative, expressed	LOC_Os11g35030	GO:0005634,GO:0005515,GO:0007275	nucleus|protein binding|multicellular organismal development	NA	NA
osa-miR396e-5p	LOC_Os01g64280.1	2441	2461	3.5	sorting nexin 1, putative, expressed	LOC_Os01g64280	GO:0006810,GO:0009987,GO:0016020,GO:0005623,GO:0009628,GO:0009606,GO:0008150,GO:0007165,GO:0007275,GO:0008289,GO:0005768,GO:0005829	transport|cellular process|membrane|cell|response to abiotic stimulus|tropism|biological_process|signal transduction|multicellular organismal development|lipid binding|endosome|cytosol	NA	NA
osa-miR396e-5p	LOC_Os08g09110.1	1150	1169	4	NB-ARC domain containing protein, expressed	LOC_Os08g09110	GO:0005623,GO:0000166,GO:0006950	cell|nucleotide binding|response to stress	NA	NA
osa-miR396e-5p	LOC_Os12g03290.1	966	985	4	AP2 domain containing protein, expressed	LOC_Os12g03290	GO:0003677,GO:0005634,GO:0009058,GO:0006139,GO:0006091,GO:0005975,GO:0009056,GO:0008150,GO:0003700,GO:0009987,GO:0006629	DNA binding|nucleus|biosynthetic process|nucleobase, nucleoside, nucleotide and nucleic acid metabolic process|generation of precursor metabolites and energy|carbohydrate metabolic process|catabolic process|biological_process|sequence-specific DNA binding transcription factor activity|cellular process|lipid metabolic process	NA	NA
osa-miR396e-5p	LOC_Os11g03540.1	984	1003	4	AP2 domain containing protein, expressed	LOC_Os11g03540	GO:0003677,GO:0005634,GO:0009058,GO:0006139,GO:0006091,GO:0005975,GO:0009056,GO:0008150,GO:0003700,GO:0009987,GO:0006629	DNA binding|nucleus|biosynthetic process|nucleobase, nucleoside, nucleotide and nucleic acid metabolic process|generation of precursor metabolites and energy|carbohydrate metabolic process|catabolic process|biological_process|sequence-specific DNA binding transcription factor activity|cellular process|lipid metabolic process	NA	NA
osa-miR1320-5p	LOC_Os05g47550.1	2223	2243	2.5	ANTH/ENTH domain containing protein, putative, expressed	LOC_Os05g47550	GO:0016020,GO:0005515,GO:0006810,GO:0016043,GO:0009987,GO:0009058,GO:0006464,GO:0008289,GO:0005488	membrane|protein binding|transport|cellular component organization|cellular process|biosynthetic process|protein modification process|lipid binding|binding	NA	NA
osa-miR1320-5p	LOC_Os01g64100.1	1069	1090	2.5	glycosyl hydrolase, putative, expressed	LOC_Os01g64100	GO:0006950,GO:0008152,GO:0009628,GO:0003824,GO:0005623,GO:0005488,GO:0016787,GO:0009991,GO:0007154	response to stress|metabolic process|response to abiotic stimulus|catalytic activity|cell|binding|hydrolase activity|response to extracellular stimulus|cell communication	path:osa00520	Amino sugar and nucleotide sugar metabolism
osa-miR1320-5p	LOC_Os06g10980.1	1805	1825	3.5	xyloglucan fucosyltransferase, putative, expressed	LOC_Os06g10980	GO:0009058,GO:0005975,GO:0009987,GO:0016020,GO:0016740,GO:0008152	biosynthetic process|carbohydrate metabolic process|cellular process|membrane|transferase activity|metabolic process	NA	NA
osa-miR1320-5p	LOC_Os11g29660.1	2759	2780	3.5	transposon protein, putative, CACTA, En/Spm sub-class, expressed	LOC_Os11g29660	NA	NA	NA	NA
osa-miR1320-5p	LOC_Os01g73670.3	2668	2687	3.5	expressed protein	LOC_Os01g73670	NA	NA	NA	NA
osa-miR1320-5p	LOC_Os01g73670.2	2763	2782	3.5	expressed protein	LOC_Os01g73670	NA	NA	NA	NA
osa-miR1320-5p	LOC_Os01g73670.1	2775	2794	3.5	expressed protein	LOC_Os01g73670	NA	NA	NA	NA
osa-miR1320-5p	LOC_Os01g73670.4	2778	2797	3.5	expressed protein	LOC_Os01g73670	NA	NA	NA	NA
osa-miR1320-5p	LOC_Os10g19322.1	2761	2780	3.5	transposon protein, putative, CACTA, En/Spm sub-class, expressed	LOC_Os10g19322	NA	NA	NA	NA
osa-miR1320-5p	LOC_Os06g42280.1	3214	3233	3.5	transposon protein, putative, CACTA, En/Spm sub-class, expressed	LOC_Os06g42280	NA	NA	NA	NA
osa-miR1320-5p	LOC_Os12g42220.1	1209	1229	4	expressed protein	LOC_Os12g42220	GO:0003674,GO:0005575,GO:0008150	molecular_function|cellular_component|biological_process	NA	NA
osa-miR1320-5p	LOC_Os03g17240.1	2724	2745	4	ankyrin repeat-containing protein, putative, expressed	LOC_Os03g17240	GO:0006950,GO:0009628,GO:0005886	response to stress|response to abiotic stimulus|plasma membrane	NA	NA
osa-miR1320-5p	LOC_Os07g12330.3	14	34	4	tryptophan/tyrosine permease family protein, putative, expressed	LOC_Os07g12330	GO:0006810,GO:0016020,GO:0009987,GO:0005215	transport|membrane|cellular process|transporter activity	NA	NA
osa-miR1320-5p	LOC_Os07g12330.2	14	34	4	tryptophan/tyrosine permease family protein, putative, expressed	LOC_Os07g12330	GO:0006810,GO:0016020,GO:0009987,GO:0005215	transport|membrane|cellular process|transporter activity	NA	NA
osa-miR1320-5p	LOC_Os05g37700.1	3204	3225	4	periplasmic beta-glucosidase precursor, putative, expressed	LOC_Os05g37700	GO:0016787,GO:0005829,GO:0005975	hydrolase activity|cytosol|carbohydrate metabolic process	NA	NA
osa-miR1320-5p	LOC_Os05g37700.2	3265	3286	4	periplasmic beta-glucosidase precursor, putative, expressed	LOC_Os05g37700	GO:0016787,GO:0005829,GO:0005975	hydrolase activity|cytosol|carbohydrate metabolic process	NA	NA
osa-miR1320-5p	LOC_Os06g11880.1	2759	2780	4	transposon protein, putative, CACTA, En/Spm sub-class, expressed	LOC_Os06g11880	NA	NA	NA	NA
osa-miR1320-5p	LOC_Os06g06760.3	46	66	4	protein kinase, putative, expressed	LOC_Os06g06760	GO:0008152,GO:0009987,GO:0000166,GO:0016301,GO:0006950,GO:0006464,GO:0003824,GO:0005622	metabolic process|cellular process|nucleotide binding|kinase activity|response to stress|protein modification process|catalytic activity|intracellular	NA	NA
osa-miR1320-5p	LOC_Os06g06760.2	46	66	4	protein kinase, putative, expressed	LOC_Os06g06760	GO:0008152,GO:0009987,GO:0000166,GO:0016301,GO:0006950,GO:0006464,GO:0003824,GO:0005622	metabolic process|cellular process|nucleotide binding|kinase activity|response to stress|protein modification process|catalytic activity|intracellular	NA	NA
osa-miR1320-5p	LOC_Os06g06760.1	46	66	4	protein kinase, putative, expressed	LOC_Os06g06760	GO:0008152,GO:0009987,GO:0000166,GO:0016301,GO:0006950,GO:0006464,GO:0003824,GO:0005622	metabolic process|cellular process|nucleotide binding|kinase activity|response to stress|protein modification process|catalytic activity|intracellular	NA	NA
osa-miR1320-5p	LOC_Os11g06620.1	3281	3302	4	transposon protein, putative, CACTA, En/Spm sub-class, expressed	LOC_Os11g06620	NA	NA	NA	NA
osa-miR1320-5p	LOC_Os07g29850.1	2453	2474	4	transposon protein, putative, CACTA, En/Spm sub-class, expressed	LOC_Os07g29850	NA	NA	NA	NA
osa-miR1320-5p	LOC_Os09g39150.1	2654	2675	4	transposon protein, putative, CACTA, En/Spm sub-class, expressed	LOC_Os09g39150	NA	NA	NA	NA
osa-miR1320-5p	LOC_Os12g34370.2	2314	2333	4	adaptor complexes medium subunit family protein, expressed	LOC_Os12g34370	GO:0006810,GO:0009987,GO:0016020,GO:0005737	transport|cellular process|membrane|cytoplasm	NA	NA
osa-miR1320-5p	LOC_Os06g04195.1	819	838	4	expressed protein	LOC_Os06g04195	NA	NA	NA	NA
osa-miR1320-5p	LOC_Os06g12940.1	567	586	4	expressed protein	LOC_Os06g12940	GO:0003674,GO:0005575,GO:0008150	molecular_function|cellular_component|biological_process	NA	NA
osa-miR1865-5p	LOC_Os02g07120.1	272	295	4	HEAT repeat family protein, putative, expressed	LOC_Os02g07120	GO:0007275,GO:0009719,GO:0005515,GO:0005618,GO:0005829,GO:0005488,GO:0005886,GO:0000003,GO:0009791	multicellular organismal development|response to endogenous stimulus|protein binding|cell wall|cytosol|binding|plasma membrane|reproduction|post-embryonic development	NA	NA

## Sheet: Table S8
Table S8: The predicted target genes of miRNAs invovled in ETS
miRNA_id	Transcript	Target_start	Target_end	Score	product	gene	GO_id	GO_term	pahtway	pathway_description
osa-miR528-3p	LOC_Os01g67170.1	656	675	3.5	expressed protein	LOC_Os01g67170	GO:0003674,GO:0008150	molecular_function|biological_process	NA	NA
osa-miR528-3p	LOC_Os01g14160.1	787	807	4	retrotransposon, putative, centromere-specific, expressed	LOC_Os01g14160	NA	NA	NA	NA
osa-miR528-3p	LOC_Os12g11440.1	427	447	4	retrotransposon protein, putative, unclassified, expressed	LOC_Os12g11440	NA	NA	NA	NA
osa-miR528-3p	LOC_Os11g01670.1	437	456	4	expressed protein	LOC_Os11g01670	NA	NA	NA	NA
osa-miR528-3p	LOC_Os05g04220.2	620	640	4	nitrogen regulatory protein P-II, putative, expressed	LOC_Os05g04220	GO:0009058,GO:0009987,GO:0005488,GO:0008152,GO:0000166,GO:0009628,GO:0019748,GO:0008150,GO:0006629,GO:0005515,GO:0005829,GO:0030234,GO:0009536	biosynthetic process|cellular process|binding|metabolic process|nucleotide binding|response to abiotic stimulus|secondary metabolic process|biological_process|lipid metabolic process|protein binding|cytosol|enzyme regulator activity|plastid	NA	NA
osa-miR528-3p	LOC_Os05g04220.1	527	547	4	nitrogen regulatory protein P-II, putative, expressed	LOC_Os05g04220	GO:0009058,GO:0009987,GO:0005488,GO:0008152,GO:0000166,GO:0009628,GO:0019748,GO:0008150,GO:0006629,GO:0005515,GO:0005829,GO:0030234,GO:0009536	biosynthetic process|cellular process|binding|metabolic process|nucleotide binding|response to abiotic stimulus|secondary metabolic process|biological_process|lipid metabolic process|protein binding|cytosol|enzyme regulator activity|plastid	NA	NA
osa-miR528-3p	LOC_Os01g05440.1	872	891	4	XH domain containing protein, expressed	LOC_Os01g05440	GO:0003674,GO:0005575,GO:0008150	molecular_function|cellular_component|biological_process	NA	NA
osa-miR11342-3p	LOC_Os04g45834.2	1166	1187	1	DUF584 domain containing protein, putative, expressed	LOC_Os04g45834	GO:0003674,GO:0008150	molecular_function|biological_process	NA	NA
osa-miR11342-3p	LOC_Os04g24414.1	101	122	1.5	expressed protein	LOC_Os04g24414	NA	NA	NA	NA
osa-miR11342-3p	LOC_Os04g24414.3	101	122	1.5	expressed protein	LOC_Os04g24414	NA	NA	NA	NA
osa-miR11342-3p	LOC_Os04g24414.2	101	122	1.5	expressed protein	LOC_Os04g24414	NA	NA	NA	NA
osa-miR11342-3p	LOC_Os01g41145.1	291	312	2	retrotransposon protein, putative, unclassified, expressed	LOC_Os01g41145	NA	NA	NA	NA
osa-miR11342-3p	LOC_Os01g51870.1	1078	1099	3	methyltransferase, putative, expressed	LOC_Os01g51870	GO:0005575,GO:0008152,GO:0016740,GO:0009987	cellular_component|metabolic process|transferase activity|cellular process	NA	NA
osa-miR11342-3p	LOC_Os01g25300.1	561	582	4	expressed protein	LOC_Os01g25300	NA	NA	NA	NA
osa-miR399d	LOC_Os08g45000.1	292	312	2	inorganic phosphate transporter, putative, expressed	LOC_Os08g45000	GO:0006810,GO:0016020,GO:0009987,GO:0005215,GO:0005886	transport|membrane|cellular process|transporter activity|plasma membrane	NA	NA
osa-miR399d	LOC_Os05g48390.1	821	841	2.5	ubiquitin conjugating enzyme protein, putative, expressed	LOC_Os05g48390	GO:0005575,GO:0006810,GO:0009991,GO:0007154,GO:0006950,GO:0006464,GO:0008150,GO:0003824	cellular_component|transport|response to extracellular stimulus|cell communication|response to stress|protein modification process|biological_process|catalytic activity	NA	NA
osa-miR399d	LOC_Os10g31864.1	4084	4103	3	expressed protein	LOC_Os10g31864	GO:0000166,GO:0005575,GO:0016043,GO:0009058,GO:0006139,GO:0009056,GO:0016787,GO:0009536,GO:0005515	nucleotide binding|cellular_component|cellular component organization|biosynthetic process|nucleobase, nucleoside, nucleotide and nucleic acid metabolic process|catabolic process|hydrolase activity|plastid|protein binding	NA	NA
osa-miR399d	LOC_Os04g55230.1	4033	4052	3	tetratricopeptide repeat domain containing protein, putative, expressed	LOC_Os04g55230	GO:0005488,GO:0009719	binding|response to endogenous stimulus	NA	NA
osa-miR399d	LOC_Os05g48390.1	1147	1167	3	ubiquitin conjugating enzyme protein, putative, expressed	LOC_Os05g48390	GO:0005575,GO:0006810,GO:0009991,GO:0007154,GO:0006950,GO:0006464,GO:0008150,GO:0003824	cellular_component|transport|response to extracellular stimulus|cell communication|response to stress|protein modification process|biological_process|catalytic activity	NA	NA
osa-miR399d	LOC_Os05g48390.1	904	924	3	ubiquitin conjugating enzyme protein, putative, expressed	LOC_Os05g48390	GO:0005575,GO:0006810,GO:0009991,GO:0007154,GO:0006950,GO:0006464,GO:0008150,GO:0003824	cellular_component|transport|response to extracellular stimulus|cell communication|response to stress|protein modification process|biological_process|catalytic activity	NA	NA
osa-miR399d	LOC_Os05g48390.1	988	1008	3	ubiquitin conjugating enzyme protein, putative, expressed	LOC_Os05g48390	GO:0005575,GO:0006810,GO:0009991,GO:0007154,GO:0006950,GO:0006464,GO:0008150,GO:0003824	cellular_component|transport|response to extracellular stimulus|cell communication|response to stress|protein modification process|biological_process|catalytic activity	NA	NA
osa-miR399d	LOC_Os05g45350.2	1110	1130	3.5	dnaJ domain containing protein, expressed	LOC_Os05g45350	GO:0019538,GO:0009987,GO:0005515,GO:0009536	protein metabolic process|cellular process|protein binding|plastid	NA	NA
osa-miR399d	LOC_Os05g48390.1	950	970	3.5	ubiquitin conjugating enzyme protein, putative, expressed	LOC_Os05g48390	GO:0005575,GO:0006810,GO:0009991,GO:0007154,GO:0006950,GO:0006464,GO:0008150,GO:0003824	cellular_component|transport|response to extracellular stimulus|cell communication|response to stress|protein modification process|biological_process|catalytic activity	NA	NA
osa-miR399d	LOC_Os05g48390.1	1033	1053	3.5	ubiquitin conjugating enzyme protein, putative, expressed	LOC_Os05g48390	GO:0005575,GO:0006810,GO:0009991,GO:0007154,GO:0006950,GO:0006464,GO:0008150,GO:0003824	cellular_component|transport|response to extracellular stimulus|cell communication|response to stress|protein modification process|biological_process|catalytic activity	NA	NA
osa-miR399d	LOC_Os04g33860.1	498	519	4	expressed protein	LOC_Os04g33860	GO:0003674,GO:0008150,GO:0009536	molecular_function|biological_process|plastid	NA	NA
osa-miR399d	LOC_Os01g68179.1	658	678	4	expressed protein	LOC_Os01g68179	NA	NA	NA	NA
osa-miR399d	LOC_Os06g17500.1	2406	2425	4	expressed protein	LOC_Os06g17500	NA	NA	NA	NA
osa-miR399d	LOC_Os12g40440.1	2138	2157	4	expressed protein	LOC_Os12g40440	GO:0003824,GO:0008152,GO:0009987,GO:0005488,GO:0006950,GO:0009628,GO:0005739,GO:0009056,GO:0009536	catalytic activity|metabolic process|cellular process|binding|response to stress|response to abiotic stimulus|mitochondrion|catabolic process|plastid	path:osa00785	Lipoic acid metabolism
osa-miR5788	LOC_Os12g02330.2	888	908	1	LTPL13 - Protease inhibitor/seed storage/LTP family protein precursor, expressed	LOC_Os12g02330	GO:0008289,GO:0005576,GO:0006950,GO:0009628,GO:0005618,GO:0009719	lipid binding|extracellular region|response to stress|response to abiotic stimulus|cell wall|response to endogenous stimulus	NA	NA
osa-miR5788	LOC_Os11g02400.1	932	952	1	LTPL8 - Protease inhibitor/seed storage/LTP family protein precursor, expressed	LOC_Os11g02400	GO:0008289,GO:0005576,GO:0006950,GO:0009628,GO:0005618,GO:0009719	lipid binding|extracellular region|response to stress|response to abiotic stimulus|cell wall|response to endogenous stimulus	NA	NA
osa-miR5788	LOC_Os11g02400.2	1030	1050	1	LTPL8 - Protease inhibitor/seed storage/LTP family protein precursor, expressed	LOC_Os11g02400	GO:0008289,GO:0005576,GO:0006950,GO:0009628,GO:0005618,GO:0009719	lipid binding|extracellular region|response to stress|response to abiotic stimulus|cell wall|response to endogenous stimulus	NA	NA
osa-miR5788	LOC_Os03g19480.1	3192	3212	2	SET domain containing protein, expressed	LOC_Os03g19480	GO:0005634,GO:0005575,GO:0009058,GO:0006139,GO:0040029,GO:0006950,GO:0009628,GO:0005515,GO:0003700,GO:0000003,GO:0009791,GO:0003723	nucleus|cellular_component|biosynthetic process|nucleobase, nucleoside, nucleotide and nucleic acid metabolic process|regulation of gene expression, epigenetic|response to stress|response to abiotic stimulus|protein binding|sequence-specific DNA binding transcription factor activity|reproduction|post-embryonic development|RNA binding	NA	NA
osa-miR5788	LOC_Os05g45820.1	1264	1284	2.5	heavy metal-associated domain containing protein, expressed	LOC_Os05g45820	GO:0005623,GO:0005488,GO:0006810	cell|binding|transport	NA	NA
osa-miR5788	LOC_Os01g44140.1	27	47	3	expressed protein	LOC_Os01g44140	NA	NA	NA	NA
osa-miR5788	LOC_Os12g44010.1	1685	1705	3	purple acid phosphatase precursor, putative, expressed	LOC_Os12g44010	GO:0005618,GO:0005575,GO:0005829,GO:0016787,GO:0008152,GO:0009987,GO:0008150	cell wall|cellular_component|cytosol|hydrolase activity|metabolic process|cellular process|biological_process	NA	NA
osa-miR5788	LOC_Os03g07430.3	2384	2404	3	protein kinase domain containing protein, expressed	LOC_Os03g07430	GO:0008152,GO:0009987,GO:0005634,GO:0000166,GO:0016301,GO:0006464,GO:0005737,GO:0005515,GO:0005886	metabolic process|cellular process|nucleus|nucleotide binding|kinase activity|protein modification process|cytoplasm|protein binding|plasma membrane	NA	NA
osa-miR5788	LOC_Os03g07430.5	2411	2431	3	protein kinase domain containing protein, expressed	LOC_Os03g07430	GO:0008152,GO:0009987,GO:0005634,GO:0000166,GO:0016301,GO:0006464,GO:0005737,GO:0005515,GO:0005886	metabolic process|cellular process|nucleus|nucleotide binding|kinase activity|protein modification process|cytoplasm|protein binding|plasma membrane	NA	NA
osa-miR5788	LOC_Os03g07430.2	2487	2507	3	protein kinase domain containing protein, expressed	LOC_Os03g07430	GO:0008152,GO:0009987,GO:0005634,GO:0000166,GO:0016301,GO:0006464,GO:0005737,GO:0005515,GO:0005886	metabolic process|cellular process|nucleus|nucleotide binding|kinase activity|protein modification process|cytoplasm|protein binding|plasma membrane	NA	NA
osa-miR5788	LOC_Os03g07430.1	2490	2510	3	protein kinase domain containing protein, expressed	LOC_Os03g07430	GO:0008152,GO:0009987,GO:0005634,GO:0000166,GO:0016301,GO:0006464,GO:0005737,GO:0005515,GO:0005886	metabolic process|cellular process|nucleus|nucleotide binding|kinase activity|protein modification process|cytoplasm|protein binding|plasma membrane	NA	NA
osa-miR5788	LOC_Os01g36350.3	1357	1377	3	cytochrome P450, putative, expressed	LOC_Os01g36350	GO:0003674,GO:0005488,GO:0003824,GO:0008152,GO:0019825	molecular_function|binding|catalytic activity|metabolic process|oxygen binding	NA	NA
osa-miR5788	LOC_Os03g07430.4	3235	3255	3	protein kinase domain containing protein, expressed	LOC_Os03g07430	GO:0008152,GO:0009987,GO:0005634,GO:0000166,GO:0016301,GO:0006464,GO:0005737,GO:0005515,GO:0005886	metabolic process|cellular process|nucleus|nucleotide binding|kinase activity|protein modification process|cytoplasm|protein binding|plasma membrane	NA	NA
osa-miR5788	LOC_Os01g51800.1	1028	1048	3	expressed protein	LOC_Os01g51800	GO:0003674,GO:0005783,GO:0008150	molecular_function|endoplasmic reticulum|biological_process	NA	NA
osa-miR5788	LOC_Os04g32540.2	1543	1563	3	OsSCP24 - Putative Serine Carboxypeptidase homologue, expressed	LOC_Os04g32540	GO:0005618,GO:0019538,GO:0016787,GO:0005575	cell wall|protein metabolic process|hydrolase activity|cellular_component	NA	NA
osa-miR5788	LOC_Os04g32540.1	1817	1837	3	OsSCP24 - Putative Serine Carboxypeptidase homologue, expressed	LOC_Os04g32540	GO:0005618,GO:0019538,GO:0016787,GO:0005575	cell wall|protein metabolic process|hydrolase activity|cellular_component	NA	NA
osa-miR5788	LOC_Os05g39540.1	1505	1525	3	metal cation transporter, putative, expressed	LOC_Os05g39540	GO:0016020,GO:0006810,GO:0009987,GO:0005215,GO:0009607,GO:0005773,GO:0005886	membrane|transport|cellular process|transporter activity|response to biotic stimulus|vacuole|plasma membrane	NA	NA
osa-miR5788	LOC_Os04g43350.1	1022	1042	3	expressed protein	LOC_Os04g43350	GO:0003674,GO:0009536,GO:0016020,GO:0009579,GO:0008150	molecular_function|plastid|membrane|thylakoid|biological_process	NA	NA
osa-miR5788	LOC_Os09g09220.1	2091	2110	3	protein kinase domain containing protein, expressed	LOC_Os09g09220	GO:0005623,GO:0008152,GO:0009987,GO:0016301,GO:0006464,GO:0006950,GO:0009607	cell|metabolic process|cellular process|kinase activity|protein modification process|response to stress|response to biotic stimulus	NA	NA
osa-miR5788	LOC_Os03g19480.1	3230	3249	3	SET domain containing protein, expressed	LOC_Os03g19480	GO:0005634,GO:0005575,GO:0009058,GO:0006139,GO:0040029,GO:0006950,GO:0009628,GO:0005515,GO:0003700,GO:0000003,GO:0009791,GO:0003723	nucleus|cellular_component|biosynthetic process|nucleobase, nucleoside, nucleotide and nucleic acid metabolic process|regulation of gene expression, epigenetic|response to stress|response to abiotic stimulus|protein binding|sequence-specific DNA binding transcription factor activity|reproduction|post-embryonic development|RNA binding	NA	NA
osa-miR5788	LOC_Os06g06490.3	903	923	3.5	U-box domain containing heat shock protein, putative, expressed	LOC_Os06g06490	GO:0009628,GO:0006950,GO:0005488	response to abiotic stimulus|response to stress|binding	NA	NA
osa-miR5788	LOC_Os11g24540.1	2013	2033	3.5	signal peptide peptidase-like 2B, putative, expressed	LOC_Os11g24540	GO:0016020,GO:0005773,GO:0019538,GO:0008152,GO:0016787	membrane|vacuole|protein metabolic process|metabolic process|hydrolase activity	NA	NA
osa-miR5788	LOC_Os11g24540.2	2212	2232	3.5	signal peptide peptidase-like 2B, putative, expressed	LOC_Os11g24540	GO:0016020,GO:0005773,GO:0019538,GO:0008152,GO:0016787	membrane|vacuole|protein metabolic process|metabolic process|hydrolase activity	NA	NA
osa-miR5788	LOC_Os04g53830.1	1210	1230	3.5	3-beta hydroxysteroid dehydrogenase/isomerase family protein, putative, expressed	LOC_Os04g53830	GO:0009058,GO:0009987,GO:0019748,GO:0003824,GO:0008152	biosynthetic process|cellular process|secondary metabolic process|catalytic activity|metabolic process	NA	NA
osa-miR5788	LOC_Os04g43290.3	1534	1554	3.5	ARPC2B, putative, expressed	LOC_Os04g43290	GO:0016043,GO:0009987,GO:0005856,GO:0005198	cellular component organization|cellular process|cytoskeleton|structural molecule activity	NA	NA
osa-miR5788	LOC_Os04g43290.1	1614	1634	3.5	ARPC2B, putative, expressed	LOC_Os04g43290	GO:0016043,GO:0009987,GO:0005856,GO:0005198	cellular component organization|cellular process|cytoskeleton|structural molecule activity	NA	NA
osa-miR5788	LOC_Os04g43290.4	1619	1639	3.5	ARPC2B, putative, expressed	LOC_Os04g43290	GO:0016043,GO:0009987,GO:0005856,GO:0005198	cellular component organization|cellular process|cytoskeleton|structural molecule activity	NA	NA
osa-miR5788	LOC_Os04g43290.2	1742	1762	3.5	ARPC2B, putative, expressed	LOC_Os04g43290	GO:0016043,GO:0009987,GO:0005856,GO:0005198	cellular component organization|cellular process|cytoskeleton|structural molecule activity	NA	NA
osa-miR5788	LOC_Os12g01510.2	2080	2100	4	MRH1, putative, expressed	LOC_Os12g01510	GO:0007165,GO:0009653,GO:0030154,GO:0007275,GO:0016301,GO:0000166,GO:0006464	signal transduction|anatomical structure morphogenesis|cell differentiation|multicellular organismal development|kinase activity|nucleotide binding|protein modification process	NA	NA
osa-miR5788	LOC_Os12g01510.1	2160	2180	4	MRH1, putative, expressed	LOC_Os12g01510	GO:0007165,GO:0009653,GO:0030154,GO:0007275,GO:0016301,GO:0000166,GO:0006464	signal transduction|anatomical structure morphogenesis|cell differentiation|multicellular organismal development|kinase activity|nucleotide binding|protein modification process	NA	NA
osa-miR5788	LOC_Os03g53750.2	1339	1360	4	nuclear prelamin A recognition factor, putative, expressed	LOC_Os03g53750	GO:0003824,GO:0005829,GO:0008152	catalytic activity|cytosol|metabolic process	NA	NA
osa-miR5788	LOC_Os12g01510.4	2305	2325	4	MRH1, putative, expressed	LOC_Os12g01510	GO:0007165,GO:0009653,GO:0030154,GO:0007275,GO:0016301,GO:0000166,GO:0006464	signal transduction|anatomical structure morphogenesis|cell differentiation|multicellular organismal development|kinase activity|nucleotide binding|protein modification process	NA	NA
osa-miR5788	LOC_Os03g53750.1	1356	1377	4	nuclear prelamin A recognition factor, putative, expressed	LOC_Os03g53750	GO:0003824,GO:0005829,GO:0008152	catalytic activity|cytosol|metabolic process	NA	NA
osa-miR5788	LOC_Os12g01510.3	2353	2373	4	MRH1, putative, expressed	LOC_Os12g01510	GO:0007165,GO:0009653,GO:0030154,GO:0007275,GO:0016301,GO:0000166,GO:0006464	signal transduction|anatomical structure morphogenesis|cell differentiation|multicellular organismal development|kinase activity|nucleotide binding|protein modification process	NA	NA
osa-miR5788	LOC_Os02g58670.1	996	1016	4	bZIP transcription factor domain containing protein, expressed	LOC_Os02g58670	GO:0003677,GO:0005634,GO:0009058,GO:0006139,GO:0009908,GO:0005515,GO:0009628,GO:0003700	DNA binding|nucleus|biosynthetic process|nucleobase, nucleoside, nucleotide and nucleic acid metabolic process|flower development|protein binding|response to abiotic stimulus|sequence-specific DNA binding transcription factor activity	NA	NA
osa-miR5788	LOC_Os02g58670.2	1154	1174	4	bZIP transcription factor domain containing protein, expressed	LOC_Os02g58670	NA	NA	NA	NA
osa-miR5788	LOC_Os10g32405.1	319	339	4	expressed protein	LOC_Os10g32405	NA	NA	NA	NA
osa-miR5788	LOC_Os09g22505.1	963	983	4	expressed protein	LOC_Os09g22505	NA	NA	NA	NA
osa-miR5788	LOC_Os08g26730.1	290	309	4	retrotransposon protein, putative, unclassified, expressed	LOC_Os08g26730	NA	NA	NA	NA
osa-miR5788	LOC_Os03g23935.1	2038	2057	4	WD domain, G-beta repeat domain containing protein, expressed	LOC_Os03g23935	GO:0005622,GO:0030154,GO:0006139,GO:0005634,GO:0000166,GO:0005654,GO:0000003,GO:0007275	intracellular|cell differentiation|nucleobase, nucleoside, nucleotide and nucleic acid metabolic process|nucleus|nucleotide binding|nucleoplasm|reproduction|multicellular organismal development	path:osa03040	Spliceosome
osa-miR827	LOC_Os02g45520.1	395	415	2.5	uncharacterized membrane protein, putative, expressed	LOC_Os02g45520	GO:0016020,GO:0005773,GO:0006810,GO:0009987	membrane|vacuole|transport|cellular process	NA	NA
osa-miR827	LOC_Os04g48390.1	334	354	3	uncharacterized membrane protein, putative, expressed	LOC_Os04g48390	GO:0016020,GO:0005773,GO:0006810,GO:0009987	membrane|vacuole|transport|cellular process	NA	NA
osa-miR827	LOC_Os01g12340.1	5342	5361	4	retrotransposon protein, putative, unclassified, expressed	LOC_Os01g12340	NA	NA	NA	NA
osa-miR408-5p	LOC_Os12g40890.1	1241	1260	2.5	OsIAA30 - Auxin-responsive Aux/IAA gene family member, expressed	LOC_Os12g40890	GO:0009719,GO:0005634,GO:0009058,GO:0006139,GO:0003700	response to endogenous stimulus|nucleus|biosynthetic process|nucleobase, nucleoside, nucleotide and nucleic acid metabolic process|sequence-specific DNA binding transcription factor activity	path:osa04075	Plant hormone signal transduction
osa-miR408-5p	LOC_Os11g08569.1	622	641	3	cycloartenol synthase, putative, expressed	LOC_Os11g08569	GO:0007275,GO:0003824,GO:0016043,GO:0009987,GO:0009058,GO:0006629,GO:0005773	multicellular organismal development|catalytic activity|cellular component organization|cellular process|biosynthetic process|lipid metabolic process|vacuole	path:osa00909	Sesquiterpenoid and triterpenoid biosynthesis
osa-miR408-5p	LOC_Os09g25600.1	1496	1515	3.5	AP2 domain containing protein, expressed	LOC_Os09g25600	NA	NA	NA	NA
osa-miR408-5p	LOC_Os10g39390.1	233	253	4	Eukaryotic aspartyl protease domain containing protein, expressed	LOC_Os10g39390	GO:0005623,GO:0019538,GO:0016787	cell|protein metabolic process|hydrolase activity	NA	NA
osa-miR408-5p	LOC_Os02g55030.1	2141	2160	4	hydrolase, NUDIX family, domain containing protein, expressed	LOC_Os02g55030	GO:0019538,GO:0008152,GO:0005515,GO:0016787,GO:0005829,GO:0005773	protein metabolic process|metabolic process|protein binding|hydrolase activity|cytosol|vacuole	NA	NA
osa-miR408-5p	LOC_Os11g06420.2	1208	1227	4	OsFBT13 - F-box and tubby domain containing protein, expressed	LOC_Os11g06420	GO:0008152,GO:0016787,GO:0009058,GO:0006139,GO:0003700,GO:0005886	metabolic process|hydrolase activity|biosynthetic process|nucleobase, nucleoside, nucleotide and nucleic acid metabolic process|sequence-specific DNA binding transcription factor activity|plasma membrane	NA	NA
osa-miR408-5p	LOC_Os11g06420.1	1212	1231	4	OsFBT13 - F-box and tubby domain containing protein, expressed	LOC_Os11g06420	GO:0008152,GO:0016787,GO:0009058,GO:0006139,GO:0003700	metabolic process|hydrolase activity|biosynthetic process|nucleobase, nucleoside, nucleotide and nucleic acid metabolic process|sequence-specific DNA binding transcription factor activity	NA	NA
osa-miR408-5p	LOC_Os08g39390.1	1513	1532	4	ZOS8-10 - C2H2 zinc finger protein, expressed	LOC_Os08g39390	GO:0005634,GO:0009908,GO:0009058,GO:0006139,GO:0005488,GO:0009856,GO:0016043,GO:0009653,GO:0030154,GO:0016049,GO:0007275,GO:0003700,GO:0003676	nucleus|flower development|biosynthetic process|nucleobase, nucleoside, nucleotide and nucleic acid metabolic process|binding|pollination|cellular component organization|anatomical structure morphogenesis|cell differentiation|cell growth|multicellular organismal development|sequence-specific DNA binding transcription factor activity|nucleic acid binding	NA	NA
osa-miR408-5p	LOC_Os07g31530.1	567	586	4	retrotransposon protein, putative, unclassified, expressed	LOC_Os07g31530	NA	NA	NA	NA
osa-miR2877	LOC_Os03g12950.1	620	643	3.5	AP2-like ethylene-responsive transcription factor AINTEGUMENTA, putative, expressed	LOC_Os03g12950	GO:0009653,GO:0007275,GO:0003677,GO:0005634,GO:0009058,GO:0006139,GO:0009987,GO:0000003,GO:0003700	anatomical structure morphogenesis|multicellular organismal development|DNA binding|nucleus|biosynthetic process|nucleobase, nucleoside, nucleotide and nucleic acid metabolic process|cellular process|reproduction|sequence-specific DNA binding transcription factor activity	NA	NA
osa-miR399j	LOC_Os05g48390.1	821	841	2	ubiquitin conjugating enzyme protein, putative, expressed	LOC_Os05g48390	GO:0005575,GO:0006810,GO:0009991,GO:0007154,GO:0006950,GO:0006464,GO:0008150,GO:0003824	cellular_component|transport|response to extracellular stimulus|cell communication|response to stress|protein modification process|biological_process|catalytic activity	NA	NA
osa-miR399j	LOC_Os04g55230.1	4033	4052	2.5	tetratricopeptide repeat domain containing protein, putative, expressed	LOC_Os04g55230	GO:0005488,GO:0009719	binding|response to endogenous stimulus	NA	NA
osa-miR399j	LOC_Os08g45000.1	292	312	3	inorganic phosphate transporter, putative, expressed	LOC_Os08g45000	GO:0006810,GO:0016020,GO:0009987,GO:0005215,GO:0005886	transport|membrane|cellular process|transporter activity|plasma membrane	NA	NA
osa-miR399j	LOC_Os05g48390.1	950	970	3	ubiquitin conjugating enzyme protein, putative, expressed	LOC_Os05g48390	GO:0005575,GO:0006810,GO:0009991,GO:0007154,GO:0006950,GO:0006464,GO:0008150,GO:0003824	cellular_component|transport|response to extracellular stimulus|cell communication|response to stress|protein modification process|biological_process|catalytic activity	NA	NA
osa-miR399j	LOC_Os05g48390.1	1033	1053	3	ubiquitin conjugating enzyme protein, putative, expressed	LOC_Os05g48390	GO:0005575,GO:0006810,GO:0009991,GO:0007154,GO:0006950,GO:0006464,GO:0008150,GO:0003824	cellular_component|transport|response to extracellular stimulus|cell communication|response to stress|protein modification process|biological_process|catalytic activity	NA	NA
osa-miR399j	LOC_Os04g33860.1	498	519	4	expressed protein	LOC_Os04g33860	GO:0003674,GO:0008150,GO:0009536	molecular_function|biological_process|plastid	NA	NA
osa-miR399j	LOC_Os02g12480.6	1893	1913	4	expressed protein	LOC_Os02g12480	NA	NA	NA	NA
osa-miR399j	LOC_Os01g65094.1	521	540	4	expressed protein	LOC_Os01g65094	GO:0003674,GO:0008150,GO:0009536	molecular_function|biological_process|plastid	NA	NA
osa-miR399j	LOC_Os01g57280.1	1320	1339	4	rp1, putative, expressed	LOC_Os01g57280	GO:0005515,GO:0006950	protein binding|response to stress	NA	NA
osa-miR399j	LOC_Os01g57280.2	1571	1590	4	rp1, putative, expressed	LOC_Os01g57280	GO:0005515,GO:0006950	protein binding|response to stress	NA	NA
osa-miR399j	LOC_Os01g57280.3	1571	1590	4	rp1, putative, expressed	LOC_Os01g57280	GO:0005515,GO:0006950	protein binding|response to stress	NA	NA
osa-miR399j	LOC_Os07g30160.1	3629	3648	4	trehalose phosphatase, putative, expressed	LOC_Os07g30160	GO:0016787,GO:0009058,GO:0005975,GO:0009987,GO:0008152	hydrolase activity|biosynthetic process|carbohydrate metabolic process|cellular process|metabolic process	NA	NA
osa-miR399j	LOC_Os05g48390.1	1147	1167	4	ubiquitin conjugating enzyme protein, putative, expressed	LOC_Os05g48390	GO:0005575,GO:0006810,GO:0009991,GO:0007154,GO:0006950,GO:0006464,GO:0008150,GO:0003824	cellular_component|transport|response to extracellular stimulus|cell communication|response to stress|protein modification process|biological_process|catalytic activity	NA	NA
osa-miR399j	LOC_Os05g48390.1	904	924	4	ubiquitin conjugating enzyme protein, putative, expressed	LOC_Os05g48390	GO:0005575,GO:0006810,GO:0009991,GO:0007154,GO:0006950,GO:0006464,GO:0008150,GO:0003824	cellular_component|transport|response to extracellular stimulus|cell communication|response to stress|protein modification process|biological_process|catalytic activity	NA	NA
osa-miR399j	LOC_Os05g48390.1	988	1008	4	ubiquitin conjugating enzyme protein, putative, expressed	LOC_Os05g48390	GO:0005575,GO:0006810,GO:0009991,GO:0007154,GO:0006950,GO:0006464,GO:0008150,GO:0003824	cellular_component|transport|response to extracellular stimulus|cell communication|response to stress|protein modification process|biological_process|catalytic activity	NA	NA
osa-miR164d	LOC_Os06g23650.1	794	814	1	no apical meristem protein, putative, expressed	LOC_Os06g23650	GO:0009987,GO:0009653,GO:0007275,GO:0005575,GO:0009058,GO:0006139,GO:0009791,GO:0009908,GO:0000003,GO:0009790,GO:0003700	cellular process|anatomical structure morphogenesis|multicellular organismal development|cellular_component|biosynthetic process|nucleobase, nucleoside, nucleotide and nucleic acid metabolic process|post-embryonic development|flower development|reproduction|embryo development|sequence-specific DNA binding transcription factor activity	NA	NA
osa-miR164d	LOC_Os06g46270.1	954	974	1	no apical meristem protein, putative, expressed	LOC_Os06g46270	GO:0000003,GO:0009653,GO:0009791,GO:0009790,GO:0009058,GO:0006139,GO:0007275,GO:0009719,GO:0007165,GO:0003700	reproduction|anatomical structure morphogenesis|post-embryonic development|embryo development|biosynthetic process|nucleobase, nucleoside, nucleotide and nucleic acid metabolic process|multicellular organismal development|response to endogenous stimulus|signal transduction|sequence-specific DNA binding transcription factor activity	NA	NA
osa-miR164d	LOC_Os12g41680.1	911	931	1	No apical meristem protein, putative, expressed	LOC_Os12g41680	GO:0000003,GO:0009653,GO:0009791,GO:0009790,GO:0009058,GO:0006139,GO:0007275,GO:0009719,GO:0007165,GO:0003700	reproduction|anatomical structure morphogenesis|post-embryonic development|embryo development|biosynthetic process|nucleobase, nucleoside, nucleotide and nucleic acid metabolic process|multicellular organismal development|response to endogenous stimulus|signal transduction|sequence-specific DNA binding transcription factor activity	NA	NA
osa-miR164d	LOC_Os08g10080.1	772	792	2.5	no apical meristem protein, putative, expressed	LOC_Os08g10080	GO:0000003,GO:0009653,GO:0009791,GO:0009790,GO:0009058,GO:0006139,GO:0007275,GO:0009719,GO:0007165,GO:0003700	reproduction|anatomical structure morphogenesis|post-embryonic development|embryo development|biosynthetic process|nucleobase, nucleoside, nucleotide and nucleic acid metabolic process|multicellular organismal development|response to endogenous stimulus|signal transduction|sequence-specific DNA binding transcription factor activity	NA	NA
osa-miR164d	LOC_Os02g36880.3	835	855	3	No apical meristem protein, putative, expressed	LOC_Os02g36880	GO:0005575,GO:0009058,GO:0006139,GO:0007275,GO:0003700	cellular_component|biosynthetic process|nucleobase, nucleoside, nucleotide and nucleic acid metabolic process|multicellular organismal development|sequence-specific DNA binding transcription factor activity	NA	NA
osa-miR164d	LOC_Os02g36880.1	841	861	3	No apical meristem protein, putative, expressed	LOC_Os02g36880	GO:0005575,GO:0009058,GO:0006139,GO:0007275,GO:0003700	cellular_component|biosynthetic process|nucleobase, nucleoside, nucleotide and nucleic acid metabolic process|multicellular organismal development|sequence-specific DNA binding transcription factor activity	NA	NA
osa-miR164d	LOC_Os02g36880.4	934	954	3	No apical meristem protein, putative, expressed	LOC_Os02g36880	GO:0005575,GO:0009058,GO:0006139,GO:0007275,GO:0003700	cellular_component|biosynthetic process|nucleobase, nucleoside, nucleotide and nucleic acid metabolic process|multicellular organismal development|sequence-specific DNA binding transcription factor activity	NA	NA
osa-miR164d	LOC_Os02g36880.2	937	957	3	No apical meristem protein, putative, expressed	LOC_Os02g36880	GO:0005575,GO:0009058,GO:0006139,GO:0007275,GO:0003700	cellular_component|biosynthetic process|nucleobase, nucleoside, nucleotide and nucleic acid metabolic process|multicellular organismal development|sequence-specific DNA binding transcription factor activity	NA	NA
osa-miR164d	LOC_Os04g38720.1	800	820	3	no apical meristem protein, putative, expressed	LOC_Os04g38720	GO:0005575,GO:0009058,GO:0006139,GO:0007275,GO:0003700	cellular_component|biosynthetic process|nucleobase, nucleoside, nucleotide and nucleic acid metabolic process|multicellular organismal development|sequence-specific DNA binding transcription factor activity	NA	NA
osa-miR164d	LOC_Os02g18690.1	566	587	3	BURP domain containing protein, expressed	LOC_Os02g18690	GO:0005623,GO:0003674,GO:0006950,GO:0009628,GO:0009719	cell|molecular_function|response to stress|response to abiotic stimulus|response to endogenous stimulus	NA	NA
osa-miR164d	LOC_Os09g37700.1	525	545	3.5	proteophosphoglycan ppg4, putative, expressed	LOC_Os09g37700	GO:0003674,GO:0005739,GO:0008150	molecular_function|mitochondrion|biological_process	NA	NA
osa-miR164d	LOC_Os08g17784.2	1069	1088	3.5	purple acid phosphatase, putative, expressed	LOC_Os08g17784	GO:0005623,GO:0016787,GO:0008152,GO:0009987,GO:0008150	cell|hydrolase activity|metabolic process|cellular process|biological_process	NA	NA
osa-miR164d	LOC_Os08g17784.1	1069	1088	3.5	purple acid phosphatase, putative, expressed	LOC_Os08g17784	GO:0005623,GO:0016787,GO:0008152,GO:0009987,GO:0008150	cell|hydrolase activity|metabolic process|cellular process|biological_process	NA	NA
osa-miR164d	LOC_Os03g47310.1	43	63	4	transposon protein, putative, CACTA, En/Spm sub-class, expressed	LOC_Os03g47310	NA	NA	NA	NA
osa-miR164d	LOC_Os08g34660.1	115	136	4	expressed protein	LOC_Os08g34660	NA	NA	NA	NA
osa-miR164d	LOC_Os12g05260.1	202	222	4	phytosulfokines precursor, putative, expressed	LOC_Os12g05260	NA	NA	NA	NA
osa-miR164d	LOC_Os12g13130.3	1318	1337	4	ZOS12-03 - C2H2 zinc finger protein, expressed	LOC_Os12g13130	GO:0005623,GO:0005488,GO:0005622,GO:0008150,GO:0003676	cell|binding|intracellular|biological_process|nucleic acid binding	NA	NA
osa-miR164d	LOC_Os02g09100.1	356	375	4	isoleucyl-tRNA synthetase, cytoplasmic, putative, expressed	LOC_Os02g09100	GO:0008152,GO:0000166,GO:0003824,GO:0008150,GO:0005829,GO:0006412,GO:0006139,GO:0005488	metabolic process|nucleotide binding|catalytic activity|biological_process|cytosol|translation|nucleobase, nucleoside, nucleotide and nucleic acid metabolic process|binding	path:osa00970	Aminoacyl-tRNA biosynthesis
osa-miR164d	LOC_Os02g33640.1	1684	1703	4	expressed protein	LOC_Os02g33640	NA	NA	NA	NA
osa-miR398b	LOC_Os07g46990.1	124	144	2.5	copper/zinc superoxide dismutase, putative, expressed	LOC_Os07g46990	GO:0008152,GO:0006950,GO:0009987,GO:0003824,GO:0009607,GO:0008150,GO:0005737,GO:0005829,GO:0005488,GO:0005576,GO:0009628	metabolic process|response to stress|cellular process|catalytic activity|response to biotic stimulus|biological_process|cytoplasm|cytosol|binding|extracellular region|response to abiotic stimulus	path:osa04146	Peroxisome
osa-miR398b	LOC_Os01g68770.1	134	153	3.5	selenium-binding protein, putative, expressed	LOC_Os01g68770	GO:0008152,GO:0009987,GO:0008150,GO:0005575,GO:0005829,GO:0005488,GO:0006950	metabolic process|cellular process|biological_process|cellular_component|cytosol|binding|response to stress	NA	NA
osa-miR398b	LOC_Os11g09780.1	500	520	4	expressed protein	LOC_Os11g09780	NA	NA	NA	NA
osa-miR396e-5p	LOC_Os02g45570.1	629	649	1	growth regulating factor protein, putative, expressed	LOC_Os02g45570	GO:0005634,GO:0007275	nucleus|multicellular organismal development	NA	NA
osa-miR396e-5p	LOC_Os02g45570.2	838	858	1	growth regulating factor protein, putative, expressed	LOC_Os02g45570	GO:0005634,GO:0007275	nucleus|multicellular organismal development	NA	NA
osa-miR396e-5p	LOC_Os06g10310.1	423	443	1	growth regulating factor protein, putative, expressed	LOC_Os06g10310	GO:0005634,GO:0007275	nucleus|multicellular organismal development	NA	NA
osa-miR396e-5p	LOC_Os06g02560.2	605	625	1	growth-regulating factor, putative, expressed	LOC_Os06g02560	GO:0005634,GO:0007275	nucleus|multicellular organismal development	NA	NA
osa-miR396e-5p	LOC_Os04g51190.3	535	555	1	growth-regulating factor, putative, expressed	LOC_Os04g51190	GO:0005634,GO:0007275	nucleus|multicellular organismal development	NA	NA
osa-miR396e-5p	LOC_Os04g51190.1	535	555	1	growth-regulating factor, putative, expressed	LOC_Os04g51190	GO:0005634,GO:0007275	nucleus|multicellular organismal development	NA	NA
osa-miR396e-5p	LOC_Os04g51190.2	535	555	1	growth-regulating factor, putative, expressed	LOC_Os04g51190	GO:0005634,GO:0007275	nucleus|multicellular organismal development	NA	NA
osa-miR396e-5p	LOC_Os02g47280.2	570	590	1	growth-regulating factor, putative, expressed	LOC_Os02g47280	GO:0005634,GO:0007275	nucleus|multicellular organismal development	NA	NA
osa-miR396e-5p	LOC_Os06g02560.1	605	625	1	growth-regulating factor, putative, expressed	LOC_Os06g02560	GO:0005634,GO:0007275	nucleus|multicellular organismal development	NA	NA
osa-miR396e-5p	LOC_Os06g02560.3	625	645	1	growth-regulating factor, putative, expressed	LOC_Os06g02560	GO:0005634,GO:0007275	nucleus|multicellular organismal development	NA	NA
osa-miR396e-5p	LOC_Os02g47280.1	667	687	1	growth-regulating factor, putative, expressed	LOC_Os02g47280	GO:0005634,GO:0007275	nucleus|multicellular organismal development	NA	NA
osa-miR396e-5p	LOC_Os02g53690.1	570	590	1	growth regulating factor protein, putative, expressed	LOC_Os02g53690	GO:0005634,GO:0007275	nucleus|multicellular organismal development	NA	NA
osa-miR396e-5p	LOC_Os03g47140.1	947	967	1	growth regulating factor protein, putative, expressed	LOC_Os03g47140	GO:0005634,GO:0005515,GO:0007275	nucleus|protein binding|multicellular organismal development	NA	NA
osa-miR396e-5p	LOC_Os04g24190.1	827	847	2	growth-regulating factor 11, putative, expressed	LOC_Os04g24190	NA	NA	NA	NA
osa-miR396e-5p	LOC_Os04g48510.1	858	878	3	growth regulating factor protein, putative, expressed	LOC_Os04g48510	GO:0005634,GO:0007275	nucleus|multicellular organismal development	NA	NA
osa-miR396e-5p	LOC_Os03g51970.1	419	439	3	growth-regulating factor, putative, expressed	LOC_Os03g51970	GO:0005634,GO:0005515,GO:0007275	nucleus|protein binding|multicellular organismal development	NA	NA
osa-miR396e-5p	LOC_Os12g29980.2	732	752	3	growth regulating factor protein, putative, expressed	LOC_Os12g29980	GO:0005634,GO:0007275	nucleus|multicellular organismal development	NA	NA
osa-miR396e-5p	LOC_Os12g29980.1	774	794	3	growth regulating factor protein, putative, expressed	LOC_Os12g29980	GO:0005634,GO:0007275	nucleus|multicellular organismal development	NA	NA
osa-miR396e-5p	LOC_Os11g35030.1	869	889	3.5	growth regulating factor protein, putative, expressed	LOC_Os11g35030	GO:0005634,GO:0005515,GO:0007275	nucleus|protein binding|multicellular organismal development	NA	NA
osa-miR396e-5p	LOC_Os11g35030.2	1556	1576	3.5	growth regulating factor protein, putative, expressed	LOC_Os11g35030	GO:0005634,GO:0005515,GO:0007275	nucleus|protein binding|multicellular organismal development	NA	NA
osa-miR396e-5p	LOC_Os01g64280.1	2441	2461	3.5	sorting nexin 1, putative, expressed	LOC_Os01g64280	GO:0006810,GO:0009987,GO:0016020,GO:0005623,GO:0009628,GO:0009606,GO:0008150,GO:0007165,GO:0007275,GO:0008289,GO:0005768,GO:0005829	transport|cellular process|membrane|cell|response to abiotic stimulus|tropism|biological_process|signal transduction|multicellular organismal development|lipid binding|endosome|cytosol	NA	NA
osa-miR396e-5p	LOC_Os08g09110.1	1150	1169	4	NB-ARC domain containing protein, expressed	LOC_Os08g09110	GO:0005623,GO:0000166,GO:0006950	cell|nucleotide binding|response to stress	NA	NA
osa-miR396e-5p	LOC_Os12g03290.1	966	985	4	AP2 domain containing protein, expressed	LOC_Os12g03290	GO:0003677,GO:0005634,GO:0009058,GO:0006139,GO:0006091,GO:0005975,GO:0009056,GO:0008150,GO:0003700,GO:0009987,GO:0006629	DNA binding|nucleus|biosynthetic process|nucleobase, nucleoside, nucleotide and nucleic acid metabolic process|generation of precursor metabolites and energy|carbohydrate metabolic process|catabolic process|biological_process|sequence-specific DNA binding transcription factor activity|cellular process|lipid metabolic process	NA	NA
osa-miR396e-5p	LOC_Os11g03540.1	984	1003	4	AP2 domain containing protein, expressed	LOC_Os11g03540	GO:0003677,GO:0005634,GO:0009058,GO:0006139,GO:0006091,GO:0005975,GO:0009056,GO:0008150,GO:0003700,GO:0009987,GO:0006629	DNA binding|nucleus|biosynthetic process|nucleobase, nucleoside, nucleotide and nucleic acid metabolic process|generation of precursor metabolites and energy|carbohydrate metabolic process|catabolic process|biological_process|sequence-specific DNA binding transcription factor activity|cellular process|lipid metabolic process	NA	NA
osa-miR2876-3p	LOC_Os03g49730.2	1684	1704	4	zinc finger protein, putative, expressed	LOC_Os03g49730	GO:0005488,GO:0008150	binding|biological_process	NA	NA
osa-miR2876-3p	LOC_Os03g49730.1	1687	1707	4	zinc finger protein, putative, expressed	LOC_Os03g49730	GO:0005488,GO:0008150	binding|biological_process	NA	NA
osa-miR11340-5p	LOC_Os04g09580.1	3962	3985	2	expressed protein	LOC_Os04g09580	NA	NA	NA	NA
osa-miR11340-5p	LOC_Os11g27799.1	2913	2936	4	expressed protein	LOC_Os11g27799	NA	NA	NA	NA
osa-miR169r-3p	LOC_Os05g43070.1	9	29	2.5	expressed protein	LOC_Os05g43070	NA	NA	NA	NA
osa-miR169r-3p	LOC_Os03g62150.1	21	41	3.5	heat shock protein DnaJ, putative, expressed	LOC_Os03g62150	GO:0019538,GO:0009987,GO:0005575,GO:0005515	protein metabolic process|cellular process|cellular_component|protein binding	NA	NA
osa-miR169r-3p	LOC_Os06g37300.2	1174	1195	4	cytochrome P450, putative, expressed	LOC_Os06g37300	GO:0005623,GO:0005783,GO:0016020,GO:0009536,GO:0019825,GO:0009987,GO:0006629,GO:0009719,GO:0007165,GO:0009058	cell|endoplasmic reticulum|membrane|plastid|oxygen binding|cellular process|lipid metabolic process|response to endogenous stimulus|signal transduction|biosynthetic process	NA	NA
osa-miR169r-3p	LOC_Os06g37300.1	1089	1110	4	cytochrome P450, putative, expressed	LOC_Os06g37300	GO:0005623,GO:0005783,GO:0016020,GO:0009536,GO:0019825,GO:0009987,GO:0006629,GO:0009719,GO:0007165,GO:0009058	cell|endoplasmic reticulum|membrane|plastid|oxygen binding|cellular process|lipid metabolic process|response to endogenous stimulus|signal transduction|biosynthetic process	NA	NA
osa-miR169r-3p	LOC_Os09g33555.1	151	172	4	expressed protein	LOC_Os09g33555	NA	NA	NA	NA
osa-miR169r-3p	LOC_Os11g34640.1	375	394	4	expressed protein	LOC_Os11g34640	NA	NA	NA	NA
osa-miR5542	LOC_Os06g20879.2	1355	1375	2	expressed protein	LOC_Os06g20879	NA	NA	NA	NA
osa-miR5542	LOC_Os06g20879.1	1355	1375	2	expressed protein	LOC_Os06g20879	NA	NA	NA	NA
osa-miR5542	LOC_Os12g03720.2	971	991	3	glucosamine--fructose-6-phosphate aminotransferase 1, putative, expressed	LOC_Os12g03720	GO:0008152,GO:0009058,GO:0005975,GO:0030246,GO:0005829,GO:0016740	metabolic process|biosynthetic process|carbohydrate metabolic process|carbohydrate binding|cytosol|transferase activity	path:osa00250,path:osa00520	Alanine, aspartate and glutamate metabolism |Amino sugar and nucleotide sugar metabolism
osa-miR5542	LOC_Os01g66760.1	1352	1372	3.5	inactive receptor kinase At2g26730 precursor, putative, expressed	LOC_Os01g66760	GO:0005634,GO:0000166,GO:0016301,GO:0006464,GO:0007165,GO:0005515,GO:0005886	nucleus|nucleotide binding|kinase activity|protein modification process|signal transduction|protein binding|plasma membrane	NA	NA
osa-miR5542	LOC_Os04g40470.1	1687	1707	3.5	cytochrome P450, putative, expressed	LOC_Os04g40470	GO:0005623,GO:0003674,GO:0005488,GO:0003824,GO:0008152,GO:0019825	cell|molecular_function|binding|catalytic activity|metabolic process|oxygen binding	NA	NA
osa-miR5542	LOC_Os01g47800.1	3209	3228	3.5	AAA-type ATPase family protein, putative, expressed	LOC_Os01g47800	GO:0008152,GO:0000166,GO:0005575,GO:0016787,GO:0009056,GO:0006139	metabolic process|nucleotide binding|cellular_component|hydrolase activity|catabolic process|nucleobase, nucleoside, nucleotide and nucleic acid metabolic process	NA	NA
osa-miR5542	LOC_Os11g01820.1	2966	2986	3.5	ATCHX, putative, expressed	LOC_Os11g01820	GO:0006810,GO:0009987,GO:0005215	transport|cellular process|transporter activity	NA	NA
osa-miR5542	LOC_Os05g35130.1	79	99	4	retrotransposon protein, putative, unclassified	LOC_Os05g35130	NA	NA	NA	NA
osa-miR5542	LOC_Os07g42180.1	2476	2496	4	exportin 1, putative, expressed	LOC_Os07g42180	GO:0009653,GO:0007275,GO:0009908,GO:0006810,GO:0009987,GO:0005829,GO:0003723,GO:0005215	anatomical structure morphogenesis|multicellular organismal development|flower development|transport|cellular process|cytosol|RNA binding|transporter activity	path:osa03013	RNA transport
osa-miR398a	LOC_Os07g46990.1	124	144	3	copper/zinc superoxide dismutase, putative, expressed	LOC_Os07g46990	GO:0008152,GO:0006950,GO:0009987,GO:0003824,GO:0009607,GO:0008150,GO:0005737,GO:0005829,GO:0005488,GO:0005576,GO:0009628	metabolic process|response to stress|cellular process|catalytic activity|response to biotic stimulus|biological_process|cytoplasm|cytosol|binding|extracellular region|response to abiotic stimulus	path:osa04146	Peroxisome
osa-miR398a	LOC_Os10g09370.1	196	216	4	retrotransposon protein, putative, unclassified, expressed	LOC_Os10g09370	NA	NA	NA	NA
osa-miR5504	LOC_Os03g63640.1	1271	1291	3	transposon protein, putative, unclassified, expressed	LOC_Os03g63640	NA	NA	NA	NA
osa-miR5504	LOC_Os12g27370.1	61	81	4	expressed protein	LOC_Os12g27370	GO:0003677,GO:0005634,GO:0009058,GO:0006259,GO:0003676	DNA binding|nucleus|biosynthetic process|DNA metabolic process|nucleic acid binding	NA	NA
osa-miR5504	LOC_Os03g16650.1	74	94	4	retrotransposon protein, putative, Ty1-copia subclass	LOC_Os03g16650	NA	NA	NA	NA
osa-miR5504	LOC_Os03g16630.1	74	94	4	retrotransposon protein, putative, Ty1-copia subclass, expressed	LOC_Os03g16630	NA	NA	NA	NA
osa-miR5504	LOC_Os01g53350.2	313	334	4	anthocyanidin 5,3-O-glucosyltransferase, putative, expressed	LOC_Os01g53350	GO:0016740,GO:0008152,GO:0005829	transferase activity|metabolic process|cytosol	NA	NA
osa-miR5504	LOC_Os01g53350.1	313	334	4	anthocyanidin 5,3-O-glucosyltransferase, putative, expressed	LOC_Os01g53350	GO:0016740,GO:0008152,GO:0005829	transferase activity|metabolic process|cytosol	NA	NA
osa-miR5144-5p	LOC_Os09g01610.1	776	796	3	clumping factor B, putative, expressed	LOC_Os09g01610	NA	NA	NA	NA
osa-miR5144-5p	LOC_Os07g37400.1	373	394	4	OsFBX257 - F-box domain containing protein, expressed	LOC_Os07g37400	GO:0003674,GO:0005575,GO:0008150	molecular_function|cellular_component|biological_process	NA	NA
osa-miR5144-5p	LOC_Os12g42960.1	1390	1410	4	expressed protein	LOC_Os12g42960	GO:0005575,GO:0006139,GO:0016043,GO:0005488	cellular_component|nucleobase, nucleoside, nucleotide and nucleic acid metabolic process|cellular component organization|binding	NA	NA
osa-miR5144-5p	LOC_Os07g30120.1	113	132	4	expressed protein	LOC_Os07g30120	NA	NA	NA	NA
osa-miR5144-5p	LOC_Os04g35240.1	1328	1348	4	CAMK_CAMK_like.25 - CAMK includes calcium/calmodulin depedent protein kinases, expressed	LOC_Os04g35240	GO:0008152,GO:0009987,GO:0005634,GO:0006950,GO:0009628,GO:0016301,GO:0006464,GO:0009719,GO:0005515,GO:0005829	metabolic process|cellular process|nucleus|response to stress|response to abiotic stimulus|kinase activity|protein modification process|response to endogenous stimulus|protein binding|cytosol	path:osa04075	Plant hormone signal transduction
osa-miR5144-5p	LOC_Os03g39900.1	864	884	4	retrotransposon protein, putative, unclassified, expressed	LOC_Os03g39900	NA	NA	NA	NA
osa-miR5144-5p	LOC_Os01g42060.1	1701	1722	4	expressed protein	LOC_Os01g42060	GO:0009856,GO:0009605,GO:0007275,GO:0003674,GO:0009790,GO:0005886	pollination|response to external stimulus|multicellular organismal development|molecular_function|embryo development|plasma membrane	NA	NA
osa-miR5144-5p	LOC_Os02g56520.1	2594	2613	4	expressed protein	LOC_Os02g56520	GO:0005618,GO:0008150	cell wall|biological_process	NA	NA
osa-miR5144-5p	LOC_Os07g30800.1	410	431	4	immunophilin, putative, expressed	LOC_Os07g30800	GO:0016020,GO:0003824,GO:0008152,GO:0009579,GO:0005515,GO:0009536,GO:0006464,GO:0016043,GO:0006091,GO:0015979,GO:0005488	membrane|catalytic activity|metabolic process|thylakoid|protein binding|plastid|protein modification process|cellular component organization|generation of precursor metabolites and energy|photosynthesis|binding	NA	NA
osa-miR528-5p	LOC_Os07g38290.1	528	547	2	plastocyanin-like domain containing protein, putative, expressed	LOC_Os07g38290	GO:0003674,GO:0005488,GO:0016020	molecular_function|binding|membrane	NA	NA
osa-miR528-5p	LOC_Os06g37150.1	2000	2020	3	L-ascorbate oxidase precursor, putative, expressed	LOC_Os06g37150	GO:0005618,GO:0005488,GO:0008152,GO:0003824	cell wall|binding|metabolic process|catalytic activity	NA	NA
osa-miR528-5p	LOC_Os08g04310.1	247	267	3.5	plastocyanin-like domain containing protein, putative, expressed	LOC_Os08g04310	GO:0003674,GO:0005488,GO:0016020	molecular_function|binding|membrane	NA	NA
osa-miR528-5p	LOC_Os06g06050.1	2648	2668	3.5	OsFBL27 - F-box domain and LRR containing protein, expressed	LOC_Os06g06050	GO:0005634,GO:0006950,GO:0009628,GO:0009653,GO:0007275,GO:0006464,GO:0005622,GO:0008150,GO:0003824,GO:0006810,GO:0019538,GO:0009056,GO:0009987	nucleus|response to stress|response to abiotic stimulus|anatomical structure morphogenesis|multicellular organismal development|protein modification process|intracellular|biological_process|catalytic activity|transport|protein metabolic process|catabolic process|cellular process	NA	NA
osa-miR528-5p	LOC_Os01g03620.1	58	79	3.5	multicopper oxidase domain containing protein, expressed	LOC_Os01g03620	GO:0009991,GO:0007154,GO:0006950,GO:0005783,GO:0003824,GO:0009628,GO:0005488,GO:0008152,GO:0007275	response to extracellular stimulus|cell communication|response to stress|endoplasmic reticulum|catalytic activity|response to abiotic stimulus|binding|metabolic process|multicellular organismal development	NA	NA
osa-miR528-5p	LOC_Os01g03640.1	44	65	3.5	multicopper oxidase domain containing protein, expressed	LOC_Os01g03640	GO:0009991,GO:0007154,GO:0006950,GO:0005783,GO:0003824,GO:0009628,GO:0005488,GO:0008152,GO:0007275	response to extracellular stimulus|cell communication|response to stress|endoplasmic reticulum|catalytic activity|response to abiotic stimulus|binding|metabolic process|multicellular organismal development	NA	NA
osa-miR528-5p	LOC_Os04g53710.1	13	32	3.5	plastocyanin-like domain containing protein, putative, expressed	LOC_Os04g53710	GO:0003674,GO:0005488,GO:0016020	molecular_function|binding|membrane	NA	NA
osa-miR528-5p	LOC_Os04g39120.1	269	289	4	copper amine oxidase, putative, expressed	LOC_Os04g39120	GO:0003824,GO:0005488,GO:0008152,GO:0005773	catalytic activity|binding|metabolic process|vacuole	NA	NA
osa-miR528-5p	LOC_Os04g04330.2	3520	3541	4	receptor-like protein kinase 2 precursor, putative, expressed	LOC_Os04g04330	GO:0008152,GO:0009987,GO:0016301,GO:0006464,GO:0005886	metabolic process|cellular process|kinase activity|protein modification process|plasma membrane	NA	NA
osa-miR528-5p	LOC_Os04g04330.1	3543	3564	4	receptor-like protein kinase 2 precursor, putative, expressed	LOC_Os04g04330	GO:0008152,GO:0009987,GO:0016301,GO:0006464,GO:0005886	metabolic process|cellular process|kinase activity|protein modification process|plasma membrane	NA	NA
osa-miR528-5p	LOC_Os08g42640.1	630	650	4	zinc finger, C3HC4 type domain containing protein, expressed	LOC_Os08g42640	GO:0006464,GO:0005488,GO:0003824	protein modification process|binding|catalytic activity	NA	NA
osa-miR528-5p	LOC_Os03g63390.1	141	160	4	plastocyanin-like domain containing protein, putative, expressed	LOC_Os03g63390	GO:0009908,GO:0009856,GO:0003674,GO:0005576,GO:0005488,GO:0030312	flower development|pollination|molecular_function|extracellular region|binding|external encapsulating structure	NA	NA
osa-miR528-5p	LOC_Os03g50160.1	173	192	4	plastocyanin-like domain containing protein, putative, expressed	LOC_Os03g50160	GO:0009908,GO:0009856,GO:0003674,GO:0005576,GO:0005488,GO:0030312	flower development|pollination|molecular_function|extracellular region|binding|external encapsulating structure	NA	NA
osa-miR528-5p	LOC_Os12g05290.1	1460	1480	4	retrotransposon protein, putative, unclassified, expressed	LOC_Os12g05290	NA	NA	NA	NA
osa-miR528-5p	LOC_Os06g49350.1	1460	1480	4	retrotransposon protein, putative, unclassified, expressed	LOC_Os06g49350	NA	NA	NA	NA
osa-miR528-5p	LOC_Os01g71840.1	1421	1441	4	retrotransposon protein, putative, unclassified, expressed	LOC_Os01g71840	NA	NA	NA	NA
osa-miR528-5p	LOC_Os03g03724.2	146	166	4	expressed protein	LOC_Os03g03724	NA	NA	NA	NA
osa-miR528-5p	LOC_Os03g03724.1	146	166	4	expressed protein	LOC_Os03g03724	NA	NA	NA	NA
osa-miR528-5p	LOC_Os12g19600.1	22	41	4	hypothetical protein	LOC_Os12g19600	NA	NA	NA	NA
osa-miR528-5p	LOC_Os01g66170.1	15	34	4	SNARE associated Golgi protein, putative, expressed	LOC_Os01g66170	GO:0008150,GO:0009536	biological_process|plastid	NA	NA
osa-miR528-5p	LOC_Os09g20090.1	229	248	4	L-ascorbate oxidase precursor, putative, expressed	LOC_Os09g20090	GO:0005488,GO:0008152,GO:0003824	binding|metabolic process|catalytic activity	NA	NA
osa-miR528-5p	LOC_Os01g62600.1	39	59	4	laccase precursor protein, putative, expressed	LOC_Os01g62600	GO:0005623,GO:0005576,GO:0006950,GO:0009628,GO:0008152	cell|extracellular region|response to stress|response to abiotic stimulus|metabolic process	NA	NA
osa-miR528-5p	LOC_Os12g36620.1	2594	2613	4	pentatricopeptide, putative, expressed	LOC_Os12g36620	GO:0005575,GO:0008150	cellular_component|biological_process	NA	NA
osa-miR528-5p	LOC_Os08g36420.3	389	409	4	metal cation transporter, putative, expressed	LOC_Os08g36420	GO:0005623,GO:0016020,GO:0006810,GO:0009987,GO:0005215	cell|membrane|transport|cellular process|transporter activity	NA	NA
osa-miR528-5p	LOC_Os08g36420.5	389	409	4	metal cation transporter, putative, expressed	LOC_Os08g36420	GO:0005623,GO:0016020,GO:0006810,GO:0009987,GO:0005215	cell|membrane|transport|cellular process|transporter activity	NA	NA
osa-miR528-5p	LOC_Os08g36420.4	700	720	4	metal cation transporter, putative, expressed	LOC_Os08g36420	GO:0005623,GO:0016020,GO:0006810,GO:0009987,GO:0005215	cell|membrane|transport|cellular process|transporter activity	NA	NA
osa-miR528-5p	LOC_Os08g36420.1	389	409	4	metal cation transporter, putative, expressed	LOC_Os08g36420	GO:0005623,GO:0016020,GO:0006810,GO:0009987,GO:0005215	cell|membrane|transport|cellular process|transporter activity	NA	NA
osa-miR528-5p	LOC_Os08g36420.2	389	409	4	metal cation transporter, putative, expressed	LOC_Os08g36420	GO:0005623,GO:0016020,GO:0006810,GO:0009987,GO:0005215	cell|membrane|transport|cellular process|transporter activity	NA	NA
osa-miR528-5p	LOC_Os01g08340.1	1549	1568	4	zinc finger family protein, putative, expressed	LOC_Os01g08340	GO:0005488,GO:0005886	binding|plasma membrane	NA	NA
osa-miR528-5p	LOC_Os08g40700.1	188	208	4	retrotransposon protein, putative, unclassified, expressed	LOC_Os08g40700	NA	NA	NA	NA
osa-miR1862e	LOC_Os04g31120.1	1891	1914	3	OsFBK14 - F-box domain and kelch repeat containing protein, expressed	LOC_Os04g31120	GO:0003674,GO:0008150	molecular_function|biological_process	NA	NA
osa-miR1862e	LOC_Os04g31120.6	1950	1973	3	OsFBK14 - F-box domain and kelch repeat containing protein, expressed	LOC_Os04g31120	GO:0003674,GO:0008150	molecular_function|biological_process	NA	NA
osa-miR1862e	LOC_Os04g31120.2	2025	2048	3	OsFBK14 - F-box domain and kelch repeat containing protein, expressed	LOC_Os04g31120	GO:0003674,GO:0008150	molecular_function|biological_process	NA	NA
osa-miR1862e	LOC_Os04g31120.4	2383	2406	3	OsFBK14 - F-box domain and kelch repeat containing protein, expressed	LOC_Os04g31120	GO:0003674,GO:0008150	molecular_function|biological_process	NA	NA
osa-miR1862e	LOC_Os04g31120.3	2460	2483	3	OsFBK14 - F-box domain and kelch repeat containing protein, expressed	LOC_Os04g31120	GO:0003674,GO:0008150	molecular_function|biological_process	NA	NA
osa-miR1862e	LOC_Os04g31120.5	3919	3942	3	OsFBK14 - F-box domain and kelch repeat containing protein, expressed	LOC_Os04g31120	GO:0003674,GO:0008150	molecular_function|biological_process	NA	NA
osa-miR1862e	LOC_Os02g30730.1	2707	2730	3.5	SART-1 family protein, putative, expressed	LOC_Os02g30730	GO:0005634,GO:0007275,GO:0009653,GO:0003674,GO:0009908,GO:0009791,GO:0005730,GO:0008150	nucleus|multicellular organismal development|anatomical structure morphogenesis|molecular_function|flower development|post-embryonic development|nucleolus|biological_process	path:osa03040	Spliceosome
osa-miR1862e	LOC_Os02g30730.2	2783	2806	3.5	SART-1 family protein, putative, expressed	LOC_Os02g30730	GO:0005634,GO:0007275,GO:0009653,GO:0003674,GO:0009908,GO:0009791,GO:0005730,GO:0008150	nucleus|multicellular organismal development|anatomical structure morphogenesis|molecular_function|flower development|post-embryonic development|nucleolus|biological_process	path:osa03040	Spliceosome
osa-miR408-3p	LOC_Os03g15340.1	85	105	1	plastocyanin-like domain containing protein, putative, expressed	LOC_Os03g15340	GO:0009908,GO:0009856,GO:0003674,GO:0005576,GO:0005488,GO:0030312	flower development|pollination|molecular_function|extracellular region|binding|external encapsulating structure	NA	NA
osa-miR408-3p	LOC_Os01g03530.1	1551	1571	1.5	multicopper oxidase domain containing protein, expressed	LOC_Os01g03530	GO:0009991,GO:0007154,GO:0006950,GO:0005783,GO:0003824,GO:0009628,GO:0005488,GO:0008152,GO:0007275	response to extracellular stimulus|cell communication|response to stress|endoplasmic reticulum|catalytic activity|response to abiotic stimulus|binding|metabolic process|multicellular organismal development	NA	NA
osa-miR408-3p	LOC_Os01g03530.2	1379	1399	1.5	multicopper oxidase domain containing protein, expressed	LOC_Os01g03530	GO:0009991,GO:0007154,GO:0006950,GO:0005783,GO:0003824,GO:0009628,GO:0005488,GO:0008152,GO:0007275	response to extracellular stimulus|cell communication|response to stress|endoplasmic reticulum|catalytic activity|response to abiotic stimulus|binding|metabolic process|multicellular organismal development	NA	NA
osa-miR408-3p	LOC_Os06g15600.1	54	74	1.5	plastocyanin-like domain containing protein, putative, expressed	LOC_Os06g15600	GO:0009908,GO:0009856,GO:0003674,GO:0005576,GO:0005488,GO:0030312	flower development|pollination|molecular_function|extracellular region|binding|external encapsulating structure	NA	NA
osa-miR408-3p	LOC_Os03g50140.1	252	272	3	plastocyanin-like domain containing protein, putative, expressed	LOC_Os03g50140	GO:0009908,GO:0009856,GO:0003674,GO:0005576,GO:0005488,GO:0030312	flower development|pollination|molecular_function|extracellular region|binding|external encapsulating structure	NA	NA
osa-miR408-3p	LOC_Os02g49850.1	130	150	3	plastocyanin-like domain containing protein, putative, expressed	LOC_Os02g49850	GO:0009908,GO:0009856,GO:0003674,GO:0005576,GO:0005488,GO:0030312	flower development|pollination|molecular_function|extracellular region|binding|external encapsulating structure	NA	NA
osa-miR408-3p	LOC_Os08g37670.1	657	677	3	plastocyanin-like domain containing protein, putative, expressed	LOC_Os08g37670	GO:0003674,GO:0005488,GO:0016020	molecular_function|binding|membrane	NA	NA
osa-miR408-3p	LOC_Os03g49820.1	131	151	3.5	expressed protein	LOC_Os03g49820	NA	NA	NA	NA
osa-miR408-3p	LOC_Os02g43660.1	681	701	3.5	plastocyanin-like domain containing protein, putative, expressed	LOC_Os02g43660	GO:0003674,GO:0005488,GO:0016020	molecular_function|binding|membrane	NA	NA
osa-miR408-3p	LOC_Os10g26030.1	499	519	3.5	retrotransposon protein, putative, unclassified, expressed	LOC_Os10g26030	NA	NA	NA	NA
osa-miR408-3p	LOC_Os07g04460.1	52	73	3.5	expressed protein	LOC_Os07g04460	NA	NA	NA	NA
osa-miR408-3p	LOC_Os05g05860.1	40	60	4	retrotransposon protein, putative, unclassified, expressed	LOC_Os05g05860	NA	NA	path:osa03020,path:osa00230,path:osa00240	RNA polymerase |Purine metabolism |Pyrimidine metabolism
osa-miR408-3p	LOC_Os04g22990.1	4552	4572	4	retrotransposon protein, putative, unclassified, expressed	LOC_Os04g22990	NA	NA	NA	NA
osa-miR408-3p	ChrSy.fgenesh.mRNA.77	1606	1626	4
osa-miR408-3p	LOC_Os06g11490.1	741	761	4	plastocyanin-like domain containing protein, putative, expressed	LOC_Os06g11490	GO:0003674,GO:0005488,GO:0016020	molecular_function|binding|membrane	NA	NA
osa-miR408-3p	LOC_Os07g43540.1	184	204	4	ORC6 - Putative origin recognition complex subunit 6, expressed	LOC_Os07g43540	GO:0005622,GO:0003677,GO:0005515,GO:0009058,GO:0006259	intracellular|DNA binding|protein binding|biosynthetic process|DNA metabolic process	NA	NA
osa-miR408-3p	LOC_Os11g25440.1	339	359	4	expressed protein	LOC_Os11g25440	NA	NA	NA	NA
osa-miR408-3p	LOC_Os02g52180.1	927	947	4	plastocyanin-like domain containing protein, putative, expressed	LOC_Os02g52180	GO:0003674,GO:0005488,GO:0016020	molecular_function|binding|membrane	NA	NA
osa-miR408-3p	LOC_Os05g12160.1	53	73	4	expressed protein	LOC_Os05g12160	NA	NA	NA	NA
osa-miR408-3p	LOC_Os04g21490.1	536	555	4	conserved hypothetical protein	LOC_Os04g21490	NA	NA	NA	NA
osa-miR1882e-3p	LOC_Os10g20480.3	1750	1773	3.5	transposon protein, putative, CACTA, En/Spm sub-class, expressed	LOC_Os10g20480	NA	NA	NA	NA
osa-miR5150-5p	LOC_Os05g40880.1	200	223	3.5	expressed protein	LOC_Os05g40880	NA	NA	NA	NA
osa-miR1437b-5p	LOC_Os07g17840.1	594	615	3.5	transposon protein, putative, unclassified, expressed	LOC_Os07g17840	NA	NA	NA	NA
osa-miR1437b-5p	LOC_Os06g13740.1	1563	1583	3.5	transposon protein, putative, unclassified, expressed	LOC_Os06g13740	NA	NA	NA	NA
osa-miR1437b-5p	LOC_Os11g41070.1	657	676	4	expressed protein	LOC_Os11g41070	NA	NA	NA	NA
osa-miR397b	LOC_Os01g62490.1	761	781	2	laccase precursor protein, putative, expressed	LOC_Os01g62490	GO:0005623,GO:0005576,GO:0009058,GO:0009987,GO:0019748,GO:0008152,GO:0003824	cell|extracellular region|biosynthetic process|cellular process|secondary metabolic process|metabolic process|catalytic activity	NA	NA
osa-miR397b	LOC_Os05g38410.1	747	767	3	laccase precursor protein, putative, expressed	LOC_Os05g38410	GO:0005623,GO:0005576,GO:0009058,GO:0009987,GO:0019748,GO:0008152,GO:0003824	cell|extracellular region|biosynthetic process|cellular process|secondary metabolic process|metabolic process|catalytic activity	NA	NA
osa-miR397b	LOC_Os05g38420.1	747	767	3	laccase precursor protein, putative, expressed	LOC_Os05g38420	GO:0005623,GO:0005576,GO:0009058,GO:0009987,GO:0019748,GO:0008152,GO:0003824	cell|extracellular region|biosynthetic process|cellular process|secondary metabolic process|metabolic process|catalytic activity	NA	NA
osa-miR397b	LOC_Os11g48060.1	1180	1200	3	laccase-22 precursor, putative, expressed	LOC_Os11g48060	GO:0005623,GO:0005576,GO:0009058,GO:0009987,GO:0019748,GO:0008152,GO:0003824	cell|extracellular region|biosynthetic process|cellular process|secondary metabolic process|metabolic process|catalytic activity	NA	NA
osa-miR397b	LOC_Os01g63200.1	666	686	4	laccase precursor protein, putative, expressed	LOC_Os01g63200	GO:0009056,GO:0009987,GO:0019748,GO:0005623,GO:0005576,GO:0008152	catabolic process|cellular process|secondary metabolic process|cell|extracellular region|metabolic process	NA	NA
osa-miR397b	LOC_Os12g15680.1	749	769	4	laccase precursor protein, putative, expressed	LOC_Os12g15680	NA	NA	NA	NA
osa-miR397b	LOC_Os01g63180.1	1088	1108	4	laccase-6 precursor, putative, expressed	LOC_Os01g63180	NA	NA	NA	NA

## Sheet: Table S9
Table S9: The predicted target genes of miRNAs invovled in ETI
miRNA_id	Transcript	Target_start	Target_end	Score	product	gene	GO_id	GO_term	pahtway	pathway_description
miRNA_id	Transcript	Target_start	Target_end	Score	product	gene	GO_id	GO_term	pahtway	pathway_description
osa-miR1863a	LOC_Os05g13804.1	36	58	2	expressed protein	LOC_Os05g13804	NA	NA	NA	NA
osa-miR1863a	LOC_Os10g37090.1	38	60	3	expressed protein	LOC_Os10g37090	NA	NA	NA	NA
osa-miR1863a	LOC_Os05g45130.1	59	83	4	retrotransposon protein, putative, unclassified, expressed	LOC_Os05g45130	NA	NA	NA	NA
osa-miR1863a	LOC_Os06g38480.2	15	37	4	retrotransposon protein, putative, unclassified, expressed	LOC_Os06g38480	NA	NA	NA	NA
osa-miR1863a	LOC_Os06g38480.1	15	37	4	retrotransposon protein, putative, unclassified, expressed	LOC_Os06g38480	NA	NA	NA	NA
osa-miR408-5p	LOC_Os12g40890.1	1241	1260	2.5	OsIAA30 - Auxin-responsive Aux/IAA gene family member, expressed	LOC_Os12g40890	GO:0009719,GO:0005634,GO:0009058,GO:0006139,GO:0003700	response to endogenous stimulus|nucleus|biosynthetic process|nucleobase, nucleoside, nucleotide and nucleic acid metabolic process|sequence-specific DNA binding transcription factor activity	path:osa04075	Plant hormone signal transduction
osa-miR408-5p	LOC_Os11g08569.1	622	641	3	cycloartenol synthase, putative, expressed	LOC_Os11g08569	GO:0007275,GO:0003824,GO:0016043,GO:0009987,GO:0009058,GO:0006629,GO:0005773	multicellular organismal development|catalytic activity|cellular component organization|cellular process|biosynthetic process|lipid metabolic process|vacuole	path:osa00909	Sesquiterpenoid and triterpenoid biosynthesis
osa-miR408-5p	LOC_Os09g25600.1	1496	1515	3.5	AP2 domain containing protein, expressed	LOC_Os09g25600	NA	NA	NA	NA
osa-miR408-5p	LOC_Os10g39390.1	233	253	4	Eukaryotic aspartyl protease domain containing protein, expressed	LOC_Os10g39390	GO:0005623,GO:0019538,GO:0016787	cell|protein metabolic process|hydrolase activity	NA	NA
osa-miR408-5p	LOC_Os02g55030.1	2141	2160	4	hydrolase, NUDIX family, domain containing protein, expressed	LOC_Os02g55030	GO:0019538,GO:0008152,GO:0005515,GO:0016787,GO:0005829,GO:0005773	protein metabolic process|metabolic process|protein binding|hydrolase activity|cytosol|vacuole	NA	NA
osa-miR408-5p	LOC_Os11g06420.2	1208	1227	4	OsFBT13 - F-box and tubby domain containing protein, expressed	LOC_Os11g06420	GO:0008152,GO:0016787,GO:0009058,GO:0006139,GO:0003700,GO:0005886	metabolic process|hydrolase activity|biosynthetic process|nucleobase, nucleoside, nucleotide and nucleic acid metabolic process|sequence-specific DNA binding transcription factor activity|plasma membrane	NA	NA
osa-miR408-5p	LOC_Os11g06420.1	1212	1231	4	OsFBT13 - F-box and tubby domain containing protein, expressed	LOC_Os11g06420	GO:0008152,GO:0016787,GO:0009058,GO:0006139,GO:0003700	metabolic process|hydrolase activity|biosynthetic process|nucleobase, nucleoside, nucleotide and nucleic acid metabolic process|sequence-specific DNA binding transcription factor activity	NA	NA
osa-miR408-5p	LOC_Os08g39390.1	1513	1532	4	ZOS8-10 - C2H2 zinc finger protein, expressed	LOC_Os08g39390	GO:0005634,GO:0009908,GO:0009058,GO:0006139,GO:0005488,GO:0009856,GO:0016043,GO:0009653,GO:0030154,GO:0016049,GO:0007275,GO:0003700,GO:0003676	nucleus|flower development|biosynthetic process|nucleobase, nucleoside, nucleotide and nucleic acid metabolic process|binding|pollination|cellular component organization|anatomical structure morphogenesis|cell differentiation|cell growth|multicellular organismal development|sequence-specific DNA binding transcription factor activity|nucleic acid binding	NA	NA
osa-miR408-5p	LOC_Os07g31530.1	567	586	4	retrotransposon protein, putative, unclassified, expressed	LOC_Os07g31530	NA	NA	NA	NA
osa-miR398b	LOC_Os07g46990.1	124	144	2.5	copper/zinc superoxide dismutase, putative, expressed	LOC_Os07g46990	GO:0008152,GO:0006950,GO:0009987,GO:0003824,GO:0009607,GO:0008150,GO:0005737,GO:0005829,GO:0005488,GO:0005576,GO:0009628	metabolic process|response to stress|cellular process|catalytic activity|response to biotic stimulus|biological_process|cytoplasm|cytosol|binding|extracellular region|response to abiotic stimulus	path:osa04146	Peroxisome
osa-miR398b	LOC_Os01g68770.1	134	153	3.5	selenium-binding protein, putative, expressed	LOC_Os01g68770	GO:0008152,GO:0009987,GO:0008150,GO:0005575,GO:0005829,GO:0005488,GO:0006950	metabolic process|cellular process|biological_process|cellular_component|cytosol|binding|response to stress	NA	NA
osa-miR398b	LOC_Os11g09780.1	500	520	4	expressed protein	LOC_Os11g09780	NA	NA	NA	NA
osa-miR1319a	LOC_Os11g02379.1	1207	1230	0	LTPL6 - Protease inhibitor/seed storage/LTP family protein precursor, expressed	LOC_Os11g02379	NA	NA	NA	NA
osa-miR1862e	LOC_Os04g31120.1	1891	1914	3	OsFBK14 - F-box domain and kelch repeat containing protein, expressed	LOC_Os04g31120	GO:0003674,GO:0008150	molecular_function|biological_process	NA	NA
osa-miR1862e	LOC_Os04g31120.6	1950	1973	3	OsFBK14 - F-box domain and kelch repeat containing protein, expressed	LOC_Os04g31120	GO:0003674,GO:0008150	molecular_function|biological_process	NA	NA
osa-miR1862e	LOC_Os04g31120.2	2025	2048	3	OsFBK14 - F-box domain and kelch repeat containing protein, expressed	LOC_Os04g31120	GO:0003674,GO:0008150	molecular_function|biological_process	NA	NA
osa-miR1862e	LOC_Os04g31120.4	2383	2406	3	OsFBK14 - F-box domain and kelch repeat containing protein, expressed	LOC_Os04g31120	GO:0003674,GO:0008150	molecular_function|biological_process	NA	NA
osa-miR1862e	LOC_Os04g31120.3	2460	2483	3	OsFBK14 - F-box domain and kelch repeat containing protein, expressed	LOC_Os04g31120	GO:0003674,GO:0008150	molecular_function|biological_process	NA	NA
osa-miR1862e	LOC_Os04g31120.5	3919	3942	3	OsFBK14 - F-box domain and kelch repeat containing protein, expressed	LOC_Os04g31120	GO:0003674,GO:0008150	molecular_function|biological_process	NA	NA
osa-miR1862e	LOC_Os02g30730.1	2707	2730	3.5	SART-1 family protein, putative, expressed	LOC_Os02g30730	GO:0005634,GO:0007275,GO:0009653,GO:0003674,GO:0009908,GO:0009791,GO:0005730,GO:0008150	nucleus|multicellular organismal development|anatomical structure morphogenesis|molecular_function|flower development|post-embryonic development|nucleolus|biological_process	path:osa03040	Spliceosome
osa-miR1862e	LOC_Os02g30730.2	2783	2806	3.5	SART-1 family protein, putative, expressed	LOC_Os02g30730	GO:0005634,GO:0007275,GO:0009653,GO:0003674,GO:0009908,GO:0009791,GO:0005730,GO:0008150	nucleus|multicellular organismal development|anatomical structure morphogenesis|molecular_function|flower development|post-embryonic development|nucleolus|biological_process	path:osa03040	Spliceosome
osa-miR169e	LOC_Os07g06470.2	1214	1234	3	nuclear transcription factor Y subunit, putative, expressed	LOC_Os07g06470	GO:0005634,GO:0005654,GO:0009058,GO:0006139,GO:0003700	nucleus|nucleoplasm|biosynthetic process|nucleobase, nucleoside, nucleotide and nucleic acid metabolic process|sequence-specific DNA binding transcription factor activity	NA	NA
osa-miR169e	LOC_Os07g06470.1	1425	1445	3	nuclear transcription factor Y subunit, putative, expressed	LOC_Os07g06470	GO:0005634,GO:0005654,GO:0009058,GO:0006139,GO:0003700	nucleus|nucleoplasm|biosynthetic process|nucleobase, nucleoside, nucleotide and nucleic acid metabolic process|sequence-specific DNA binding transcription factor activity	NA	NA
osa-miR169e	LOC_Os04g51370.2	1536	1555	3	protein kinase, putative, expressed	LOC_Os04g51370	GO:0008152,GO:0009987,GO:0016301,GO:0000166,GO:0005575,GO:0005829,GO:0006464,GO:0009719	metabolic process|cellular process|kinase activity|nucleotide binding|cellular_component|cytosol|protein modification process|response to endogenous stimulus	NA	NA
osa-miR169e	LOC_Os04g51370.1	1536	1555	3	protein kinase, putative, expressed	LOC_Os04g51370	GO:0008152,GO:0009987,GO:0016301,GO:0000166,GO:0005575,GO:0005829,GO:0006464,GO:0009719	metabolic process|cellular process|kinase activity|nucleotide binding|cellular_component|cytosol|protein modification process|response to endogenous stimulus	NA	NA
osa-miR169e	LOC_Os02g18064.1	636	657	3.5	expressed protein	LOC_Os02g18064	NA	NA	NA	NA
osa-miR169e	LOC_Os03g07880.3	756	776	3.5	nuclear transcription factor Y subunit, putative, expressed	LOC_Os03g07880	GO:0005654,GO:0009058,GO:0006139,GO:0003700	nucleoplasm|biosynthetic process|nucleobase, nucleoside, nucleotide and nucleic acid metabolic process|sequence-specific DNA binding transcription factor activity	NA	NA
osa-miR169e	LOC_Os03g07880.1	844	864	3.5	nuclear transcription factor Y subunit, putative, expressed	LOC_Os03g07880	GO:0005634,GO:0005654,GO:0009058,GO:0006139,GO:0003700,GO:0009536	nucleus|nucleoplasm|biosynthetic process|nucleobase, nucleoside, nucleotide and nucleic acid metabolic process|sequence-specific DNA binding transcription factor activity|plastid	NA	NA
osa-miR169e	LOC_Os03g07880.2	993	1013	3.5	nuclear transcription factor Y subunit, putative, expressed	LOC_Os03g07880	GO:0005654,GO:0009058,GO:0006139,GO:0003700	nucleoplasm|biosynthetic process|nucleobase, nucleoside, nucleotide and nucleic acid metabolic process|sequence-specific DNA binding transcription factor activity	NA	NA
osa-miR169e	LOC_Os07g41720.1	1169	1189	3.5	nuclear transcription factor Y subunit, putative, expressed	LOC_Os07g41720	GO:0005654,GO:0009058,GO:0006139,GO:0003700	nucleoplasm|biosynthetic process|nucleobase, nucleoside, nucleotide and nucleic acid metabolic process|sequence-specific DNA binding transcription factor activity	NA	NA
osa-miR169e	LOC_Os07g41720.2	1302	1322	3.5	nuclear transcription factor Y subunit, putative, expressed	LOC_Os07g41720	GO:0005654,GO:0009058,GO:0006139,GO:0003700	nucleoplasm|biosynthetic process|nucleobase, nucleoside, nucleotide and nucleic acid metabolic process|sequence-specific DNA binding transcription factor activity	NA	NA
osa-miR169e	LOC_Os03g29760.3	1264	1284	3.5	nuclear transcription factor Y subunit, putative, expressed	LOC_Os03g29760	GO:0005634,GO:0005654,GO:0009058,GO:0006139,GO:0003700,GO:0009536	nucleus|nucleoplasm|biosynthetic process|nucleobase, nucleoside, nucleotide and nucleic acid metabolic process|sequence-specific DNA binding transcription factor activity|plastid	NA	NA
osa-miR169e	LOC_Os03g29760.1	1284	1304	3.5	nuclear transcription factor Y subunit, putative, expressed	LOC_Os03g29760	GO:0005634,GO:0005654,GO:0009058,GO:0006139,GO:0003700,GO:0009536	nucleus|nucleoplasm|biosynthetic process|nucleobase, nucleoside, nucleotide and nucleic acid metabolic process|sequence-specific DNA binding transcription factor activity|plastid	NA	NA
osa-miR169e	LOC_Os03g29760.2	1364	1384	3.5	nuclear transcription factor Y subunit, putative, expressed	LOC_Os03g29760	GO:0005634,GO:0005654,GO:0009058,GO:0006139,GO:0003700,GO:0009536	nucleus|nucleoplasm|biosynthetic process|nucleobase, nucleoside, nucleotide and nucleic acid metabolic process|sequence-specific DNA binding transcription factor activity|plastid	NA	NA
osa-miR169e	LOC_Os02g53620.1	988	1008	3.5	nuclear transcription factor Y subunit, putative, expressed	LOC_Os02g53620	GO:0005654,GO:0009058,GO:0006139,GO:0003700	nucleoplasm|biosynthetic process|nucleobase, nucleoside, nucleotide and nucleic acid metabolic process|sequence-specific DNA binding transcription factor activity	NA	NA
osa-miR169e	LOC_Os12g42400.2	1202	1222	4	nuclear transcription factor Y subunit, putative, expressed	LOC_Os12g42400	GO:0005634,GO:0005654,GO:0009058,GO:0006139,GO:0003700	nucleus|nucleoplasm|biosynthetic process|nucleobase, nucleoside, nucleotide and nucleic acid metabolic process|sequence-specific DNA binding transcription factor activity	NA	NA
osa-miR169e	LOC_Os12g42400.3	1247	1267	4	nuclear transcription factor Y subunit, putative, expressed	LOC_Os12g42400	GO:0005634,GO:0005654,GO:0009058,GO:0006139,GO:0003700	nucleus|nucleoplasm|biosynthetic process|nucleobase, nucleoside, nucleotide and nucleic acid metabolic process|sequence-specific DNA binding transcription factor activity	NA	NA
osa-miR169e	LOC_Os12g42400.1	1256	1276	4	nuclear transcription factor Y subunit, putative, expressed	LOC_Os12g42400	GO:0005634,GO:0005654,GO:0009058,GO:0006139,GO:0003700	nucleus|nucleoplasm|biosynthetic process|nucleobase, nucleoside, nucleotide and nucleic acid metabolic process|sequence-specific DNA binding transcription factor activity	NA	NA
osa-miR169e	LOC_Os04g37970.1	101	122	4	transporter family protein, putative, expressed	LOC_Os04g37970	GO:0006810,GO:0016020,GO:0009987,GO:0005215	transport|membrane|cellular process|transporter activity	NA	NA
osa-miR169e	LOC_Os03g48970.4	1228	1248	4	nuclear transcription factor Y subunit, putative, expressed	LOC_Os03g48970	GO:0007275,GO:0005654,GO:0009058,GO:0006139,GO:0003700,GO:0000003,GO:0009791,GO:0009790	multicellular organismal development|nucleoplasm|biosynthetic process|nucleobase, nucleoside, nucleotide and nucleic acid metabolic process|sequence-specific DNA binding transcription factor activity|reproduction|post-embryonic development|embryo development	NA	NA
osa-miR169e	LOC_Os03g48970.1	1236	1256	4	nuclear transcription factor Y subunit, putative, expressed	LOC_Os03g48970	GO:0007275,GO:0005654,GO:0009058,GO:0006139,GO:0003700,GO:0000003,GO:0009791,GO:0009790	multicellular organismal development|nucleoplasm|biosynthetic process|nucleobase, nucleoside, nucleotide and nucleic acid metabolic process|sequence-specific DNA binding transcription factor activity|reproduction|post-embryonic development|embryo development	NA	NA
osa-miR169e	LOC_Os03g48970.2	1765	1785	4	nuclear transcription factor Y subunit, putative, expressed	LOC_Os03g48970	GO:0007275,GO:0005654,GO:0009058,GO:0006139,GO:0003700,GO:0000003,GO:0009791,GO:0009790	multicellular organismal development|nucleoplasm|biosynthetic process|nucleobase, nucleoside, nucleotide and nucleic acid metabolic process|sequence-specific DNA binding transcription factor activity|reproduction|post-embryonic development|embryo development	NA	NA
osa-miR169e	LOC_Os03g48970.3	1935	1955	4	nuclear transcription factor Y subunit, putative, expressed	LOC_Os03g48970	GO:0007275,GO:0005654,GO:0009058,GO:0006139,GO:0003700,GO:0000003,GO:0009791,GO:0009790	multicellular organismal development|nucleoplasm|biosynthetic process|nucleobase, nucleoside, nucleotide and nucleic acid metabolic process|sequence-specific DNA binding transcription factor activity|reproduction|post-embryonic development|embryo development	NA	NA
osa-miR1882e-3p	LOC_Os10g20480.3	1750	1773	3.5	transposon protein, putative, CACTA, En/Spm sub-class, expressed	LOC_Os10g20480	NA	NA	NA	NA
osa-miR393b-5p	LOC_Os05g05800.1	1697	1717	1	OsFBL21 - F-box domain and LRR containing protein, expressed	LOC_Os05g05800	GO:0009719,GO:0009991,GO:0007154,GO:0006950,GO:0005488,GO:0009653,GO:0009791,GO:0009908,GO:0007165,GO:0006464,GO:0009607,GO:0007275,GO:0005622,GO:0003824,GO:0005515,GO:0019538,GO:0009056,GO:0009987	response to endogenous stimulus|response to extracellular stimulus|cell communication|response to stress|binding|anatomical structure morphogenesis|post-embryonic development|flower development|signal transduction|protein modification process|response to biotic stimulus|multicellular organismal development|intracellular|catalytic activity|protein binding|protein metabolic process|catabolic proces…	NA	NA
osa-miR393b-5p	LOC_Os04g32460.2	1822	1842	1	OsFBL16 - F-box domain and LRR containing protein, expressed	LOC_Os04g32460	GO:0005488,GO:0009908,GO:0006464,GO:0009607,GO:0007275,GO:0003824,GO:0016020,GO:0005773,GO:0005515	binding|flower development|protein modification process|response to biotic stimulus|multicellular organismal development|catalytic activity|membrane|vacuole|protein binding	NA	NA
osa-miR393b-5p	LOC_Os04g32460.1	2224	2244	1	OsFBL16 - F-box domain and LRR containing protein, expressed	LOC_Os04g32460	GO:0005488,GO:0009908,GO:0006464,GO:0009607,GO:0007275,GO:0003824,GO:0016020,GO:0005773,GO:0005515	binding|flower development|protein modification process|response to biotic stimulus|multicellular organismal development|catalytic activity|membrane|vacuole|protein binding	NA	NA
osa-miR393b-5p	LOC_Os04g58734.1	284	305	3.5	expressed protein	LOC_Os04g58734	NA	NA	NA	NA
osa-miR1425-3p	LOC_Os09g27950.1	955	974	2.5	galactosyltransferase, putative, expressed	LOC_Os09g27950	GO:0009058,GO:0006464,GO:0005975,GO:0016740,GO:0008152,GO:0005794	biosynthetic process|protein modification process|carbohydrate metabolic process|transferase activity|metabolic process|Golgi apparatus	NA	NA
osa-miR1425-3p	LOC_Os08g09250.2	482	501	3	glyoxalase family protein, putative, expressed	LOC_Os08g09250	GO:0003824,GO:0008152,GO:0005777,GO:0005773,GO:0005488,GO:0008150,GO:0005829,GO:0005975,GO:0009536,GO:0005886	catalytic activity|metabolic process|peroxisome|vacuole|binding|biological_process|cytosol|carbohydrate metabolic process|plastid|plasma membrane	path:osa00620	Pyruvate metabolism
osa-miR1425-3p	LOC_Os08g09250.1	482	501	3	glyoxalase family protein, putative, expressed	LOC_Os08g09250	GO:0003824,GO:0008152,GO:0005777,GO:0005773,GO:0005488,GO:0008150,GO:0005829,GO:0005975,GO:0009536,GO:0005886	catalytic activity|metabolic process|peroxisome|vacuole|binding|biological_process|cytosol|carbohydrate metabolic process|plastid|plasma membrane	path:osa00620	Pyruvate metabolism
osa-miR1425-3p	LOC_Os08g09250.3	1272	1291	3	glyoxalase family protein, putative, expressed	LOC_Os08g09250	GO:0003824,GO:0008152,GO:0006950,GO:0009628,GO:0009579,GO:0005488,GO:0005975,GO:0009536	catalytic activity|metabolic process|response to stress|response to abiotic stimulus|thylakoid|binding|carbohydrate metabolic process|plastid	path:osa00620	Pyruvate metabolism
osa-miR1425-3p	LOC_Os01g04840.1	734	754	4	vacuolar protein sorting-associating protein 4B, putative, expressed	LOC_Os01g04840	GO:0005634,GO:0008152,GO:0000166,GO:0005575,GO:0009653,GO:0016043,GO:0030154,GO:0007275,GO:0005737,GO:0006810,GO:0009987,GO:0005515,GO:0016787,GO:0005768	nucleus|metabolic process|nucleotide binding|cellular_component|anatomical structure morphogenesis|cellular component organization|cell differentiation|multicellular organismal development|cytoplasm|transport|cellular process|protein binding|hydrolase activity|endosome	NA	NA
osa-miR1425-3p	LOC_Os09g10010.1	410	430	4	expressed protein	LOC_Os09g10010	NA	NA	NA	NA
osa-miR397b	LOC_Os01g62490.1	761	781	2	laccase precursor protein, putative, expressed	LOC_Os01g62490	GO:0005623,GO:0005576,GO:0009058,GO:0009987,GO:0019748,GO:0008152,GO:0003824	cell|extracellular region|biosynthetic process|cellular process|secondary metabolic process|metabolic process|catalytic activity	NA	NA
osa-miR397b	LOC_Os05g38410.1	747	767	3	laccase precursor protein, putative, expressed	LOC_Os05g38410	GO:0005623,GO:0005576,GO:0009058,GO:0009987,GO:0019748,GO:0008152,GO:0003824	cell|extracellular region|biosynthetic process|cellular process|secondary metabolic process|metabolic process|catalytic activity	NA	NA
osa-miR397b	LOC_Os05g38420.1	747	767	3	laccase precursor protein, putative, expressed	LOC_Os05g38420	GO:0005623,GO:0005576,GO:0009058,GO:0009987,GO:0019748,GO:0008152,GO:0003824	cell|extracellular region|biosynthetic process|cellular process|secondary metabolic process|metabolic process|catalytic activity	NA	NA
osa-miR397b	LOC_Os11g48060.1	1180	1200	3	laccase-22 precursor, putative, expressed	LOC_Os11g48060	GO:0005623,GO:0005576,GO:0009058,GO:0009987,GO:0019748,GO:0008152,GO:0003824	cell|extracellular region|biosynthetic process|cellular process|secondary metabolic process|metabolic process|catalytic activity	NA	NA
osa-miR397b	LOC_Os01g63200.1	666	686	4	laccase precursor protein, putative, expressed	LOC_Os01g63200	GO:0009056,GO:0009987,GO:0019748,GO:0005623,GO:0005576,GO:0008152	catabolic process|cellular process|secondary metabolic process|cell|extracellular region|metabolic process	NA	NA
osa-miR397b	LOC_Os12g15680.1	749	769	4	laccase precursor protein, putative, expressed	LOC_Os12g15680	NA	NA	NA	NA
osa-miR397b	LOC_Os01g63180.1	1088	1108	4	laccase-6 precursor, putative, expressed	LOC_Os01g63180	NA	NA	NA	NA
